# Supplementary material
Source: PubMed Central journal article supplement (PMC3954459)

# A Broadly Applicable NHC–Cu-Catalyzed Approach for Efficient, Site- and Enantioselective Coupling of Readily Accessible (Pinacolato)alkenylboron Compounds to Allylic Phosphates and Applications to Natural Product Synthesis

Fang Gao, James L. Carr and Amir H. Hoveyda\*

*Department of Chemistry, Merkert Chemistry Center,  
Boston College, Chestnut Hill, Massachusetts 02467*

## SUPPORTING INFORMATION

### Table of Contents

|                                                                                                                                                                                 |         |
|---------------------------------------------------------------------------------------------------------------------------------------------------------------------------------|---------|
| General.....                                                                                                                                                                    | S2      |
| Reagents and Imidazolium Salts.....                                                                                                                                             | S3–S4   |
| Characterization Data for New Allylic Phosphates.....                                                                                                                           | S5      |
| Representative Experimental Procedure for Cu-Catalyzed Enantioselective Allylic Substitution (EAS) with <i>trans</i> -1,2-Disubstituted Alkenylboron Reagents.....              | S5–S6   |
| Characterization Data for Compounds in Table 1 & Scheme 3–4 .....                                                                                                               | S6–S12  |
| Synthesis of Irregular Monoterpene and Its Characterization Data.....                                                                                                           | S12–S13 |
| Cu-Catalyzed Enantioselective Allylic Substitution (EAS) with Alkyl-Substituted <i>cis</i> -Alkenylboron Reagents and Characterization Data for Compounds in Scheme 5 and 6.... | S13–S25 |
| Cu-Catalyzed Enantioselective Allylic Substitution (EAS) with Aryl-Substituted <i>cis</i> -Alkenylboron Reagents and Characterization Data for Compounds in Scheme 7 and 8...   | S25–S27 |
| Formal Synthesis of Heliespirone A and Heliannuol E and Characterization Data for Compounds in Scheme 9.....                                                                    | S27–S31 |
| Synthesis of Santolina Alcohol and Its Characterization Data (eq 1).....                                                                                                        | S31     |
| Cu-Catalyzed Enantioselective Allylic Substitution (EAS) with Heterocycle-Substituted Alkenylboron Reagents and Characterization Data for Compounds in Scheme 10.....           | S31–S38 |
| Diastereo- and Enantioselective Synthesis of Semburin and Characterization Data for Compounds in Scheme 11.....                                                                 | S38–S42 |

|                                                                                                                                                                 |         |
|-----------------------------------------------------------------------------------------------------------------------------------------------------------------|---------|
| Cu-Catalyzed Enantioselective Allylic Substitution (EAS) with 1,1-Disubstituted Alkenylboron Reagents and Characterization Data for Compounds in Scheme 12..... | S42–S43 |
| Cu-Catalyzed Enantioselective Allylic Substitution (EAS) with Vinyl–B(pin) and Characterization Data for Compounds in Scheme 13.....                            | S43–S47 |
| X-Ray Crystallography Data for Compound <b>47a</b> .....                                                                                                        | S47–S57 |

**General.** Infrared (IR) spectra were recorded on a Bruker FT-IR Alpha (ATR mode) spectrophotometer,  $\nu_{\max}$  in  $\text{cm}^{-1}$ . Bands are characterized as broad (br), strong (s), medium (m), and weak (w).  $^1\text{H}$  NMR spectra were recorded on a Varian Unity INOVA 400 (400 MHz) spectrometer. Chemical shifts are reported in ppm from tetramethylsilane with the solvent resonance as the internal standard ( $\text{CDCl}_3$ : 7.26 ppm). Data are reported as follows: chemical shift, integration, multiplicity (s = singlet, d = doublet, t = triplet, q = quartet, m = multiplet), and coupling constants (Hz).  $^{13}\text{C}$  NMR spectra were recorded on a Varian Unity INOVA 400 (100 MHz) spectrometer with complete proton decoupling. Chemical shifts are reported in ppm from tetramethylsilane with the solvent resonance as the internal standard ( $\text{CDCl}_3$ : 77.16 ppm). High-resolution mass spectrometry was performed on a Micromass LCT ESI-MS (positive mode) at the Mass Spectrometry Facility, Boston College. Enantiomer ratios were determined by GLC analysis (gas liquid chromatography) with an Agilent chromatograph (Alltech Associated Chiral dex CD-BDM column (30 m x 0.25 mm)), HPLC analysis (high-performance liquid chromatography) with a Shimadzu chromatograph (Chiral Technologies Chiralcel OD-H (4.6 x 250 mm), Chiral Technologies Chiralpak AD-H (4.6 x 250 mm), Chiral Technologies Chiralcel OJ-H (4.6 x 250 mm) Chiral Technologies Chiralpak AS-H (4.6 x 250 mm)) in comparison with authentic racemic materials. Specific rotations were measured on a Rudolph Research Analytical Autopol IV Polarimeter.

Unless otherwise noted, all reactions were carried out with distilled and degassed solvents under an atmosphere of dry  $\text{N}_2$  in oven- (135 °C) or flame-dried glassware with standard dry box or vacuum-line techniques. Diethylether, benzene and dichloromethane (Fisher Scientific) were purified by passing through two alumina columns under a positive pressure of dry argon by a modified Innovative Technologies purification system. Tetrahydrofuran (Aldrich Chemical Co.) was purified by distillation from sodium benzophenone ketyl immediately prior to use unless otherwise specified. All work-up and purification procedures were carried out with reagent grade solvents (purchased from Fisher Scientific) under air. All substrates are prepared according to previously reported procedures and the characterization data of the unknown compounds will be disclosed within this text;<sup>1</sup> all substrates possess *E* olefin geometry and purities are established by  $^1\text{H}$  NMR analysis (400 MHz). Allylic phosphate that yields product **16** is prepared according to a previously reported procedure<sup>1b</sup> from the corresponding alcohol, which has been disclosed before.<sup>2</sup> Allylic phosphates **1d**<sup>3a</sup> and **39**<sup>3b</sup> are synthesized according to the general phosphorylation procedure<sup>1</sup> from the corresponding alcohols reported in previous studies.<sup>3</sup>

## ■ Reagents and Imidazolinium Salts:

**9-Borabicyclo[3.3.1]nonane (0.5 M in thf):** purchased from Aldrich Chemical Co. and used as received.

**(Z)-2-(9-Bromonon-1-en-1-yl)-4,4,5,5-tetramethyl-1,3,2-dioxaborolane:** prepared according to a previously disclosed procedure.<sup>4</sup>

**tert-Butanol:** purchased from Aldrich Chemical Co. and used as received.

**(Z)-2-(2-Butoxyvinyl)-4,4,5,5-tetramethyl-1,3,2-dioxaborolane:** prepared according to a previously disclosed procedure.<sup>4</sup>

**tert-Butyl hydroperoxide solution (5.0~6.0 M in decane):** purchased from Aldrich Chemical Co. and used as received.

**tert-Butyl (2-(4,4,5,5-tetramethyl-1,3,2-dioxaborolan-2-yl)allyl)carbamate (56):** prepared according to a previously disclosed procedure.<sup>5</sup>

**tert-Butyl 4-(4,4,5,5-tetramethyl-1,3,2-dioxaborolan-2-yl)-3,6-dihydropyridine-1(2H)-carboxylate (41):** purchased from Frontier Scientific Inc. and used as received.

**tert-Butyl (Z)-(3-(4,4,5,5-tetramethyl-1,3,2-dioxaborolan-2-yl)allyl)carbamate:** prepared according to a previously disclosed procedure.<sup>4</sup>

**(Z)-tert-Butyldimethyl((3-(4,4,5,5-tetramethyl-1,3,2-dioxaborolan-2-yl)allyl)oxy)silane (24):** prepared according to a previously reported procedure.<sup>4</sup>

**(Z)-tert-Butyldimethyl((4-(4,4,5,5-tetramethyl-1,3,2-dioxaborolan-2-yl)but-3-en-2-yl)oxy)silane (34):** prepared according to a previously disclosed procedure.<sup>6</sup>

**Copper(I) chloride:** purchased from Strem Chemicals Inc. and used as received.

**Dess-Martin Periodinane:** purchased from TCI America and used as received.

**1,2-Dichloroethane:** purchased from Aldrich Chemical Co. and used as received.

**(E)-2-(3,3-Diethoxyprop-1-en-1-yl)-4,4,5,5-tetramethyl-1,3,2-dioxaborolane (10):** generously donated to us by Frontier Scientific Inc. and used as received.

**2-(3,4-Dihydro-2H-pyran-6-yl)-4,4,5,5-tetramethyl-1,3,2-dioxaborolane:** purchased from Frontier Scientific Inc. and used as received.

**2-(3,6-Dihydro-2H-pyran-4-yl)-4,4,5,5-tetramethyl-1,3,2-dioxaborolane (49):** purchased from Frontier Scientific Inc. as a dark brown oil and used as a white solid after purification through silica gel column chromatography.

**Diisobutylaluminum hydride (neat):** purchased from Aldrich Chemical Co. and used as received.

**Ethanol (200 proof):** purchased from Fisher Scientific and used as received.

**(E)-Ethyl 3-(4,4,5,5-tetramethyl-1,3,2-dioxaborolan-2-yl)acrylate (14):** generously donated to us by Frontier Scientific Inc. and used as received.

**Imidazolinium salt 9a and 9b:** prepared according to a previously reported procedure.<sup>1e</sup>

**Imidazolinium salt 9c:** prepared according to a previously reported procedure.<sup>7</sup>

**Imidazolinium salt 52:** prepared according to a previously reported procedure.<sup>8</sup>

**Imidazolinium salts 4 and 5:** prepared according to a previously reported procedure.<sup>9</sup>

**Imidazolinium salt 6:** prepared according to a previously reported procedure.<sup>10</sup>

**Imidazolinium salt 7:** prepared according to a previously reported procedure.<sup>11</sup>

**Imidazolinium salt 8:** prepared according to a previously reported procedure.<sup>1d</sup>

**Lithium borohydride solution (2.0 M in tetrahydrofuran):** purchased from Aldrich Chemical Co. and used as received.

**(Z)-2-(9-((4-Methoxybenzyl)oxy)non-1-en-1-yl)-4,4,5,5-tetramethyl-1,3,2-dioxaborolane:** prepared according to a previously reported procedure.<sup>4</sup>

**(Z)-2-(4-Methoxystyryl)-4,4,5,5-tetramethyl-1,3,2-dioxaborolane (32):** prepared according to a previously reported procedure.<sup>4</sup>

**Methylithium (1.6 M solution in diethylether):** purchased from Acros Organics and used as received from an Acroseal container.

**Methylmagnesium iodide (~1.0 M solution in Et<sub>2</sub>O):** prepared from methyl iodide and Mg turnings in diethylether and used immediately after titration.

**Poly(methylhydrosiloxane):** purchased from Aldrich Chemical Co. and used as received.

**Potassium hydroxide:** purchased from Fisher Scientific and used as received.

**Pyridinium chlorochromate:** purchased from Aldrich Chemical Co. and used as received.

**Pyridinium *p*-toluenesulfonate:** purchased from Aldrich Chemical Co. and used as received.

**Sodium bicarbonate:** purchased from Fisher Scientific and used as received.

**Sodium methoxide:** purchased from Strem Chemicals Inc. and used as received.

**Sodium perborate tetrahydrate:** purchased from Aldrich Chemical Co. and used as received.

**Tetrabutylammonium fluoride (1.0 M solution in tetrahydrofuran):** purchased from Aldrich Chemical Co. and used as received.

**4,4,5,5-Tetramethyl-2-(2-methylprop-1-en-1-yl)-1,3,2-dioxaborolane (40):** purchased from Frontier Scientific Inc. and used as received.

**(E)-4,4,5,5-Tetramethyl-2-(oct-1-en-1-yl)-1,3,2-dioxaborolane (2):** purchased from Aldrich Chemical Co. and purified by distillation over CaH<sub>2</sub>.

**4,4,5,5-Tetramethyl-2-(1-phenylvinyl)-1,3,2-dioxaborolane:** purchased from Aldrich Chemical Co. and used as received.

**(Z)-4,4,5,5-Tetramethyl-2-(prop-1-en-1-yl)-1,3,2-dioxaborolane (18):** purchased from Aldrich Chemical Co. and used as received.

**(Z)-4,4,5,5-Tetramethyl-2-styryl-1,3,2-dioxaborolane (30):** prepared according to a previously reported procedure.<sup>4</sup>

**Titanium(IV) isopropoxide:** purchased from Aldrich Chemical Co. and used as received.

**Vinylboronic acid pinacol ester (22):** purchased from Aldrich Chemical Co. and used immediately after vacuum transfer under N<sub>2</sub> atmosphere.



### ■ Characterization Data for Allylic Phosphates

**(E)-4-((Diethoxyphosphoryl)oxy)-3-methylbut-2-en-1-yl acetate (substrate that leads to compound 17, Scheme 4):** IR (neat): 2985 (w), 2934 (w), 1737 (s), 1444 (w), 1368 (w), 1230 (s), 1166 (w), 1004 (s), 955 (s), 877 (m), 801 (m), 750 (w), 590 (w), 506 (m), 421 (w)  $\text{cm}^{-1}$ ;  $^1\text{H}$  NMR (400 MHz,  $\text{CDCl}_3$ ):  $\delta$  5.66–5.62 (1H, m), 4.60 (2H, dd,  $J = 7.2, 0.8$  Hz), 4.22 (2H, d,  $J = 6.4$  Hz), 4.09 (4H, ddq,  $J = 7.6, 6.8, 0.8$  Hz), 2.02 (3H, s), 1.73 (3H, d,  $J = 0.8$  Hz), 1.31 (6H, dt,  $J = 6.8, 0.8$  Hz);  $^{13}\text{C}$  NMR (100 MHz,  $\text{CDCl}_3$ ):  $\delta$  171.0, 136.0 (d,  $J = 7.6$  Hz), 122.0, 71.5 (d,  $J = 5.3$  Hz), 63.9 (d,  $J = 6.0$  Hz), 60.6, 21.0, 16.0 (d,  $J = 6.8$  Hz), 13.8; HRMS (ESI+): Calcd for  $\text{C}_{11}\text{H}_{21}\text{P}_1\text{Na}_1\text{O}_6$  [ $\text{M}+\text{Na}$ ] $^+$ : 303.0968, Found: 303.0966.

**(E)-3-(2,5-Dimethoxy-4-methylphenyl)allyl diethyl phosphate (1d):** IR (neat): 2984 (w), 2937 (w), 2833 (w), 1508 (m), 1466 (m), 1401 (m), 1271 (m), 1211 (s), 1038 (s), 975 (s), 860 (w), 818 (w), 543 (w)  $\text{cm}^{-1}$ ;  $^1\text{H}$  NMR (400 MHz,  $\text{CDCl}_3$ ):  $\delta$  6.97 (1H, d,  $J = 15.6$  Hz), 6.90 (1H, s), 6.70 (1H, s), 6.29 (1H, dt,  $J = 16.0, 6.0$  Hz), 4.70 (2H, ddd,  $J = 8.0, 5.6, 1.6$  Hz), 4.14 (4H, dq,  $J = 7.2, 7.2$  Hz), 3.81 (3H, s), 3.80 (3H, s), 2.22 (3H, s), 1.35 (6H, dt,  $J = 7.2, 0.8$  Hz);  $^{13}\text{C}$  NMR (100 MHz,  $\text{CDCl}_3$ ):  $\delta$  152.0, 151.1, 129.4, 128.2, 123.2 (d,  $J = 6.9$  Hz), 122.8, 114.7, 109.0, 68.8 (d,  $J = 5.3$  Hz), 63.9 (d,  $J = 6.0$  Hz), 56.4, 56.1, 16.6, 16.3 (d,  $J = 6.9$  Hz); HRMS (ESI+): Calcd for  $\text{C}_{16}\text{H}_{25}\text{P}_1\text{O}_6$  [ $\text{M}$ ] $^+$ : 344.13887, Found: 344.13780.

**(E)-Diethyl (4-hydroxy-4-methylpent-2-en-1-yl) phosphate (39):** IR (neat): 3410 (w), 2972 (w), 2925 (w), 1464 (w), 1372 (w), 1256 (m), 1164 (w), 1019 (s), 968 (s), 802 (m), 547 (w), 526 (w)  $\text{cm}^{-1}$ ;  $^1\text{H}$  NMR (400 MHz,  $\text{CDCl}_3$ ):  $\delta$  5.93 (1H, dt,  $J = 15.6, 1.2$  Hz), 5.78 (1H, dt,  $J = 15.6, 6.0$  Hz), 4.51 (2H, ddd,  $J = 8.0, 5.6, 0.8$  Hz), 4.10 (4H, dq,  $J = 7.2, 7.2$  Hz), 1.33 (6H, dt,  $J = 7.2, 0.8$  Hz), s), 1.31 (6H, s);  $^{13}\text{C}$  NMR (100 MHz,  $\text{CDCl}_3$ ):  $\delta$  142.5, 121.4 (d,  $J = 6.9$  Hz), 70.5, 67.6 (d,  $J = 5.3$  Hz), 63.9 (d,  $J = 6.1$  Hz), 29.7 (d,  $J = 8.3$  Hz), 16.3 (d,  $J = 6.8$  Hz); HRMS (ESI+): Calcd for  $\text{C}_{10}\text{H}_{21}\text{P}_1\text{Na}_1\text{O}_5$  [ $\text{M}+\text{Na}$ ] $^+$ : 275.1019, Found: 275.1017.

■ **Experimental Procedure for NHC–Cu-Catalyzed Enantioselective Allylic Substitution (EAS) with *trans*-1,2-Disubstituted Alkenylboron Reagents (Table 1):** In an  $\text{N}_2$ -filled glove box, an oven-dried 1-dram vial (15 x 45 mm) with a magnetic stir bar is charged with imidazolium salt **9b** (4.7 mg, 0.0055 mmol), NaOMe (10.8 mg, 0.200 mmol) and CuCl (0.5 mg, 0.005 mmol). The vial is sealed with a cap (phenolic open top cap with a red PTFE/white silicone septum) and electrical tape before removal from the glove box. To the vial under an  $\text{N}_2$  atmosphere is added tetrahydrofuran (thf, 0.5 mL) and the resulting suspension is allowed to stir at 22 °C for one hour. The suspension turns from off-white to light-yellow during catalyst formation. Meanwhile, in a separate vial, cinnamyl diethyl phosphate **1a** (27.0 mg, 0.100 mmol) and (*E*)-4,4,5,5-tetramethyl-2-(oct-1-en-1-yl)-1,3,2-dioxaborolane **2** (47.6 mg, 0.200 mmol) are weighted out and the vial is sealed and purged with  $\text{N}_2$  flow for 10 min before thf (0.5 mL) is added through a syringe. The stock solution is transferred through a syringe to the reaction vessel that contains the in situ-formed catalyst and the resulting yellow solution is allowed to stir at 22 °C for additional 24 h. At this point, the mixture is allowed to pass through a short plug of silica gel eluted with  $\text{Et}_2\text{O}$ . The filtrate is concentrated under reduced pressure to provide a

yellow oil residue, which is purified by silica gel column chromatography (100% hexanes) to afford product **3** as colorless oil (22.1 mg, 0.0968 mmol, 97% yield). (*S,E*)-Undeca-1,4-dien-3-ylbenzene (**3**, Table 1). The product has been previously reported and spectral data match those previously described.<sup>1b</sup> <sup>1</sup>H NMR (400 MHz, CDCl<sub>3</sub>): δ 7.31–7.28 (2H, m), 7.21–7.18 (3H, m), 6.02 (1H, ddd, *J* = 16.8, 10.0, 6.8 Hz), 5.60 (1H, ddt, *J* = 15.6, 7.2, 1.6 Hz), 5.50 (1H, ddt, *J* = 15.2, 6.8, 0.8 Hz), 5.11 (1H, d, *J* = 10.0 Hz), 5.05 (1H, d, *J* = 17.2 Hz), 4.06 (1H, dd, *J* = 6.8, 6.8 Hz), 2.05 (2H, dt, *J* = 7.2, 7.2 Hz), 1.37–1.25 (8H, m), 0.88 (3H, t, *J* = 7.2 Hz). Specific Rotation:  $[\alpha]_D^{20} +15.1$  (*c* 0.467, CHCl<sub>3</sub>) for an enantiomerically enriched sample of 92:8 er.

**Determination of stereochemical identity:** Literature value ( $[\alpha]_D^{20} -11.0$  (*c* 1.49, CHCl<sub>3</sub>), 89.5:10.5 er) is assigned to the (*R*) enantiomer.<sup>1b</sup>

Enantiomeric purity is determined by HPLC analysis of the derived primary alcohol (obtained from hydroboration of the terminal olefin with 9-BBN, followed by oxidation with NaBO<sub>3</sub>•4H<sub>2</sub>O) in comparison with authentic racemic material (92:8 er shown; Chiralcel OD column, 99/1 hexanes/*i*-PrOH, 0.8 mL/min, 220 nm).

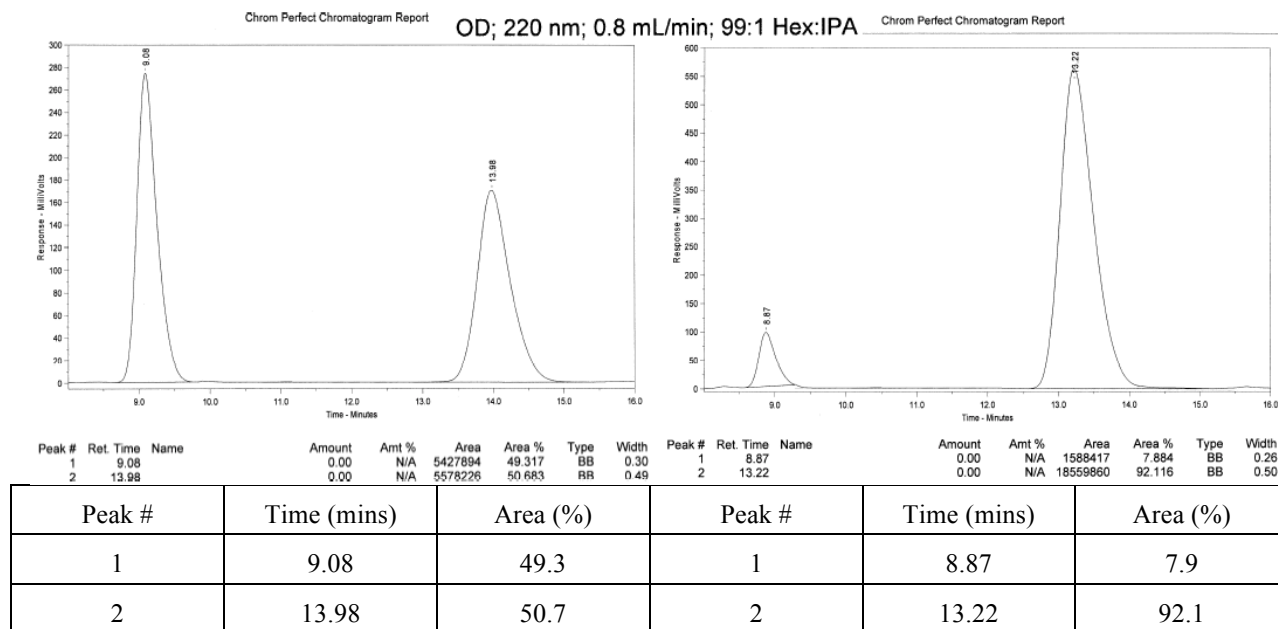

■ **Representative Experimental Procedure for NHC–Cu-Catalyzed Enantioselective Allylic Substitution (EAS) with Acetal-Containing *trans*-1,2-Disubstituted Alkenylboron Reagents (Scheme 3):** In this section, the reactions are performed following the same representative procedure as described for Table 1. The specific differences are included within the characterization data of each compound.

**(*S,E*)-1-(6,6-Diethoxyhexa-1,4-dien-3-yl)-4-nitrobenzene (11, Scheme 3).** Same procedure as described in Table 1 is followed. The title compound is isolated by column chromatography with basified silica gel (5% NEt<sub>3</sub>). IR (neat): 2976 (w), 2928 (w), 2876 (w), 1598 (w), 1521 (s), 1346 (s), 1133 (w), 1052 (m), 996 (w), 854 (w) cm<sup>-1</sup>; <sup>1</sup>H NMR (400 MHz, CDCl<sub>3</sub>): δ 8.19–8.16 (2H, m), 7.39–7.35 (2H, m), 6.04–5.95 (2H, m), 5.58 (1H, ddd, *J* = 17.2, 5.2, 1.6 Hz), 5.22 (1H, ddd,

$J = 10.4, 1.2, 1.2$  Hz), 5.10 (1H, ddd,  $J = 17.2, 1.2, 1.2$  Hz), 4.93 (1H, dd,  $J = 6.0, 0.8$  Hz), 4.20 (1H, dd,  $J = 6.8, 6.8$  Hz), 3.67–3.60 (2H, m), 3.54–3.45 (2H, m), 1.24–1.19 (6H, m);  $^{13}\text{C}$  NMR (100 MHz,  $\text{CDCl}_3$ ):  $\delta$  149.9, 146.9, 138.3, 134.1, 130.2, 129.1, 124.0, 117.3, 101.0, 61.2, 51.5, 15.39, 15.40; HRMS (ESI+): Calcd for  $\text{C}_{14}\text{H}_{16}\text{N}_1\text{O}_3$   $[\text{M}-\text{OEt}]^+$ : 246.11302, Found: 246.11300. Specific Rotation:  $[\alpha]_{\text{D}}^{20} +3.79$  ( $c$  0.327,  $\text{CHCl}_3$ ) for an enantiomerically enriched sample of 93:7 er.

Enantiomeric purity is determined by HPLC analysis in comparison with authentic racemic material (93:7 er shown; Chiralcel OJ-H column, 99/1 hexanes/*i*-PrOH, 1.0 mL/min, 254 nm).

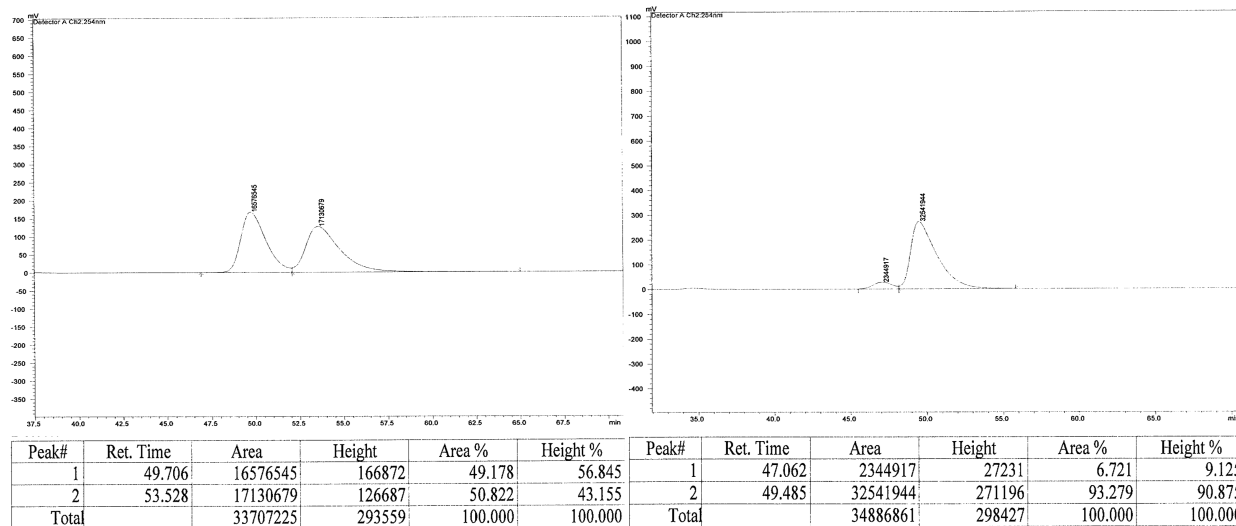

| Peak # | Time (mins) | Area (%) | Peak # | Time (mins) | Area (%) |
|--------|-------------|----------|--------|-------------|----------|
| 1      | 49.71       | 49.2     | 1      | 47.06       | 6.7      |
| 2      | 53.53       | 50.8     | 2      | 49.49       | 93.3     |

**(*S,E*)-4-(4-Nitrophenyl)hexa-2,5-dienal (12b, Scheme 3).** Same procedure as described in Table 1 is followed. The reaction mixture is dissolved in  $\text{Et}_2\text{O}$  and treated with solid silica gel (ca. 100 mg). The resulting suspension is allowed to stir at 22 °C for one hour before it is passed through a cotton plug eluted with  $\text{Et}_2\text{O}$ . Solvent is removed by rotary evaporation to afford a yellow oil residue, which is purified by regular silica gel column chromatography. IR (neat): 2985 (w), 2827 (w), 1699 (s), 1634 (w), 1472 (m), 1433 (w), 1166 (w), 1031 (m), 985 (w), 927 (m), 754 (w)  $\text{cm}^{-1}$ ;  $^1\text{H}$  NMR (400 MHz,  $\text{CDCl}_3$ ):  $\delta$  9.61 (1H, dd,  $J = 8.0, 2.8$  Hz), 8.24–8.20 (2H, m), 7.41–7.37 (2H, m), 6.96 (1H, dd,  $J = 16.0, 6.8$  Hz), 6.15 (1H, ddd,  $J = 17.2, 7.6, 1.6$  Hz), 6.03 (1H, ddd,  $J = 17.2, 10.4, 6.8$  Hz), 5.36 (1H, dd,  $J = 10.0, 0.8$  Hz), 5.20 (1H, dd,  $J = 17.2, 0.8$  Hz), 4.45 (1H, dd,  $J = 6.8, 6.8$  Hz);  $^{13}\text{C}$  NMR (100 MHz,  $\text{CDCl}_3$ ):  $\delta$  193.2, 155.7, 147.4, 147.2, 136.1, 133.9, 129.2, 124.3, 118.9, 51.7; HRMS (ESI+): Calcd for  $\text{C}_{12}\text{H}_{12}\text{N}_1\text{O}_3$   $[\text{M}+\text{H}]^+$ : 218.08172, Found: 218.08203. Specific Rotation:  $[\alpha]_{\text{D}}^{20} +17.2$  ( $c$  0.492,  $\text{CHCl}_3$ ) for an enantiomerically enriched sample of 93:7 er.

Enantiomeric purity is determined by HPLC analysis in comparison with authentic racemic material (93:7 er shown; Chiralcel OJ-H column, 95/5 hexanes/*i*-PrOH, 1.0 mL/min, 220 nm).

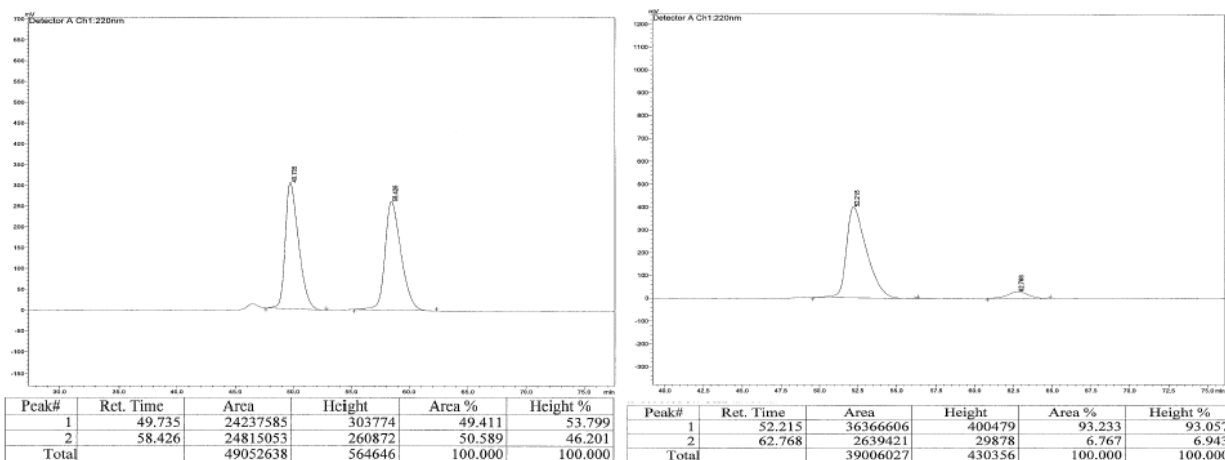

| Peak # | Time (mins) | Area (%) | Peak # | Time (mins) | Area (%) |
|--------|-------------|----------|--------|-------------|----------|
| 1      | 49.74       | 49.4     | 1      | 52.22       | 93.2     |
| 2      | 58.43       | 50.6     | 2      | 62.77       | 6.8      |

**(*S,E*)-4-Phenylhexa-2,5-dienal (12a, Scheme 3).** The title compound is prepared by the same procedure as with **12b**. IR (neat): 3083 (w), 3061 (w), 3029 (w), 2980 (w), 2818 (w), 2735 (w), 1687 (s), 1631 (w), 1600 (w), 1492 (w), 1453 (w), 1111 (m), 978 (m), 923 (m), 758 (m), 701 (s)  $\text{cm}^{-1}$ ;  $^1\text{H}$  NMR (400 MHz,  $\text{CDCl}_3$ ):  $\delta$  9.51 (1H, d,  $J = 8.0$  Hz), 7.31–7.26 (2H, m), 7.23–7.19 (1H, m), 7.13 (2H, dd,  $J = 8.4, 1.2$  Hz), 6.92 (1H, dd,  $J = 15.6, 6.8$  Hz), 6.09–5.94 (2H, m), 5.19 (1H, ddd,  $J = 10.4, 1.2, 1.2$  Hz), 5.07 (1H, ddd,  $J = 17.2, 1.6, 0.8$  Hz), 4.25 (1H, dd,  $J = 6.8, 6.8$  Hz);  $^{13}\text{C}$  NMR (100 MHz,  $\text{CDCl}_3$ ):  $\delta$  193.8, 158.3, 140.1, 137.6, 133.1, 129.1, 128.2, 127.5, 117.5, 52.2; HRMS (ESI+): Calcd for  $\text{C}_{12}\text{H}_{13}\text{O}_1$   $[\text{M}+\text{H}]^+$ : 173.09664, Found: 173.09718. Specific Rotation:  $[\alpha]_{\text{D}}^{20} +16.0$  ( $c$  0.807,  $\text{CHCl}_3$ ) for an enantiomerically enriched sample of 91:9 er.

Enantiomeric purity is determined by HPLC analysis in comparison with authentic racemic material (91:9 er shown; Chiralcel OJ-H column, 99/1 hexanes/*i*-PrOH, 0.5 mL/min, 220 nm).

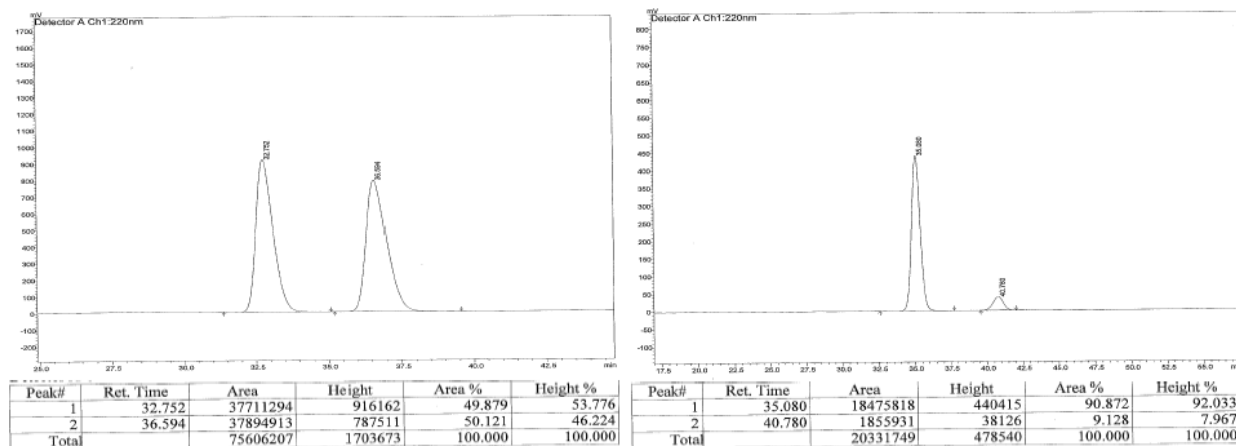

| Peak # | Time (mins) | Area (%) | Peak # | Time (mins) | Area (%) |
|--------|-------------|----------|--------|-------------|----------|
| 1      | 32.75       | 49.9     | 1      | 35.08       | 90.8     |
| 2      | 36.59       | 50.1     | 2      | 40.78       | 9.1      |

**(*S,E*)-1-Bromo-2-(6,6-diethoxyhexa-1,4-dien-3-yl)benzene (S1, Scheme 3).** The title compound is prepared by the same procedure as with **11**. IR (neat): 2975 (m), 2929 (w), 2878 (w), 1468 (w), 1439 (w), 1339 (w), 1300 (w), 1133 (m), 1051 (s), 1022 (w), 996 (m), 920 (w), 754 (m)  $\text{cm}^{-1}$ ;  $^1\text{H}$  NMR (400 MHz,  $\text{CDCl}_3$ ):  $\delta$  7.55 (1H, dd,  $J = 8.0, 1.6$  Hz), 7.27 (1H, ddd,  $J = 7.6, 7.2, 1.2$  Hz), 7.21 (1H, dd,  $J = 7.6, 2.0$  Hz), 7.08 (1H, ddd,  $J = 9.2, 7.2, 1.6$  Hz), 6.02–5.93 (2H, m), 5.55 (1H, ddd,  $J = 16.0, 5.2, 1.6$  Hz), 5.20 (1H, ddd,  $J = 10.4, 1.6, 1.6$  Hz), 5.08 (1H, ddd,  $J = 17.2, 1.6, 1.6$  Hz), 4.93 (1H, ddd,  $J = 5.2, 0.8, 0.8$  Hz), 4.62 (1H, ddd,  $J = 6.4, 6.0, 0.8$  Hz), 3.68–3.59 (2H, m), 3.54–3.45 (2H, m), 1.23–1.18 (6H, m);  $^{13}\text{C}$  NMR (100 MHz,  $\text{CDCl}_3$ ):  $\delta$  141.2, 138.4, 134.5, 133.2, 129.8, 129.7, 128.2, 127.7, 124.9, 116.7, 101.3, 61.0, 49.9, 15.42, 15.40; HRMS (ESI+): Calcd for  $\text{C}_{14}\text{H}_{16}\text{O}_1\text{Br}_1$   $[\text{M}-\text{EtO}]^+$ : 279.03845, Found: 279.03902. Specific Rotation:  $[\alpha]_{\text{D}}^{20} -18.5$  ( $c$  0.780,  $\text{CHCl}_3$ ) for an enantiomerically enriched sample of 94:6 er. Enantiomeric purity is determined by HPLC analysis of the derived enal (see below).

**(*S,E*)-4-(2-Bromophenyl)hexa-2,5-dienal (12c, Scheme 3).** The title compound is prepared using the same procedure as with **12b**. IR (neat): 3063 (w), 2981 (w), 2816 (w), 2734 (w), 1691 (s), 1630 (w), 1469 (w), 1437 (w), 1122 (w), 1023 (w), 979 (w), 926 (w), 756 (m)  $\text{cm}^{-1}$ ;  $^1\text{H}$  NMR (400 MHz,  $\text{CDCl}_3$ ):  $\delta$  9.60 (1H, d,  $J = 7.6$  Hz), 7.60 (1H, dd,  $J = 8.0, 1.2$  Hz), 7.32 (1H, ddd,  $J = 7.6, 7.6, 1.2$  Hz), 7.21–7.13 (2H, m), 6.95 (1H, dd,  $J = 15.6, 6.0$  Hz), 6.11 (1H, ddd,  $J = 15.6, 7.6, 1.6$  Hz), 6.02 (1H, ddd,  $J = 17.2, 10.4, 6.4$  Hz), 5.32 (1H, ddd,  $J = 10.0, 1.2, 0.8$  Hz), 5.16 (1H, ddd,  $J = 17.2, 1.6, 0.8$  Hz), 4.89–4.85 (1H, m);  $^{13}\text{C}$  NMR (100 MHz,  $\text{CDCl}_3$ ):  $\delta$  193.7, 157.0, 139.2, 136.3, 133.8, 133.5, 129.7, 129.1, 128.1, 124.8, 118.3, 50.5; HRMS (ESI+): Calcd for  $\text{C}_{12}\text{H}_{12}\text{Br}_1\text{O}_1$   $[\text{M}+\text{H}]^+$ : 251.00715, Found: 251.00766. Specific Rotation:  $[\alpha]_{\text{D}}^{20} -14.6$  ( $c$  0.467,  $\text{CHCl}_3$ ) for an enantiomerically enriched sample of 94:6 er.

Enantiomeric purity is determined by HPLC analysis in comparison with authentic racemic material (94:6 er shown; Chiralcel OJ-H column, 99/1 hexanes/*i*-PrOH, 0.5 mL/min, 220 nm).

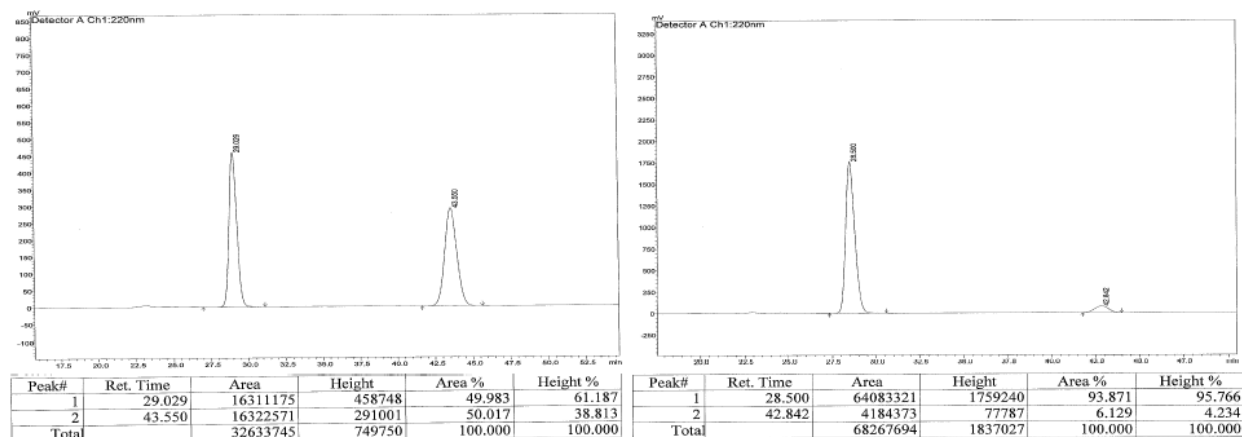

| Peak # | Time (mins) | Area (%) | Peak # | Time (mins) | Area (%) |
|--------|-------------|----------|--------|-------------|----------|
|--------|-------------|----------|--------|-------------|----------|

|   |       |      |   |       |      |
|---|-------|------|---|-------|------|
| 1 | 29.03 | 50.0 | 1 | 28.50 | 93.9 |
| 2 | 43.55 | 50.0 | 2 | 42.84 | 6.1  |

**Methyl (*S,E*)-3-(4-chlorophenyl)-6,6-diethoxy-2-methylenehex-4-enoate (**13**, Scheme 3).** The title compound is prepared by the same procedure as with **11**, except in the presence of 2.5 mol % **9b**, 25 mol % CuCl and 1.5 equiv NaOMe. IR (neat): 2972 (w), 2928 (w), 2870 (w), 1720 (s), 1599 (w), 1488 (m), 1340 (s), 1243 (s), 1234 (m), 1134 (w), 1128 (s), 1080 (m), 1052 (s), 997 (m), 825 (w) cm<sup>-1</sup>; <sup>1</sup>H NMR (400 MHz, CDCl<sub>3</sub>) δ 7.26 (2H, d, *J* = 8.4 Hz), 7.12 (2H, d, *J* = 8.4 Hz), 6.37 (1H, app s), 6.06 (1H, ddd, *J* = 15.6, 6.8, 1.2 Hz), 5.60 (1H, t, *J* = 1.2 Hz), 5.38 (1H, ddd, *J* = 15.6, 4.8, 1.6 Hz), 4.91 (1H, dt, *J* = 5.2, 0.8 Hz), 4.65 (1H, br d, *J* = 6.8 Hz), 3.68 (3H, s), 3.64–3.55 (2H, m), 3.51–3.43 (2H, m), 1.19 (6H, dt, *J* = 7.2, 0.8 Hz); <sup>13</sup>C NMR (100 MHz, CDCl<sub>3</sub>) δ 167.5, 143.6, 139.4, 134.3, 133.9, 130.7, 126.9, 124.5, 124.1, 100.9, 61.1, 52.1, 50.5, 15.39, 15.41; HRMS (ESI<sup>+</sup>): Calcd for C<sub>16</sub>H<sub>18</sub><sup>35</sup>ClO<sub>3</sub> [M–OEt]<sup>+</sup>: 293.0945, Found: 293.0921.

Enantiomeric purity is determined by HPLC analysis in comparison with authentic racemic material (92:8 er shown; Chiralcel OD column, 99/1 hexanes/*i*-PrOH, 0.8 mL/min, 220 nm).

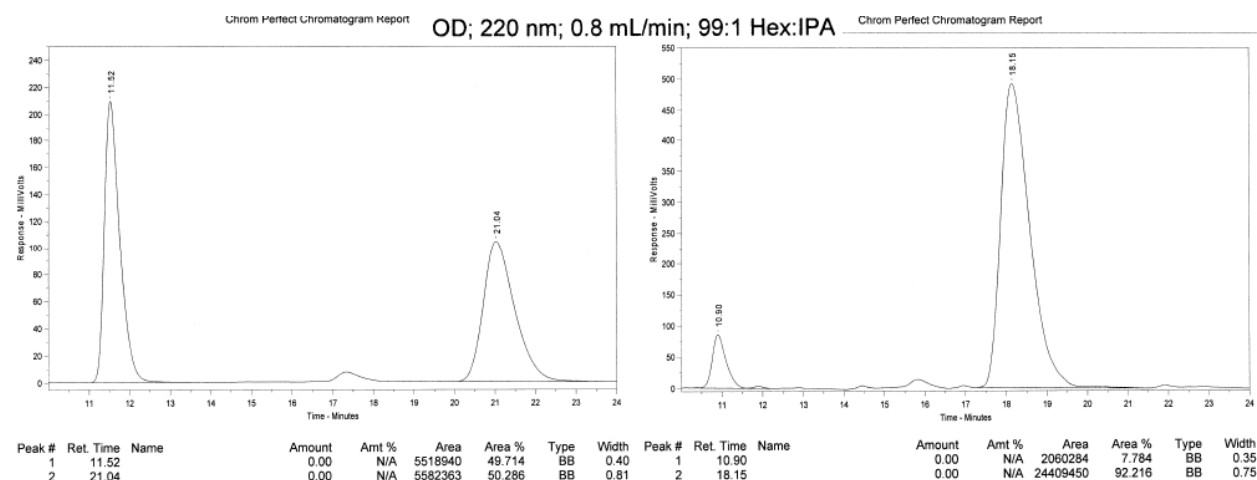

| Peak # | Time (mins) | Area (%) | Peak # | Time (mins) | Area (%) |
|--------|-------------|----------|--------|-------------|----------|
| 1      | 11.52       | 49.7     | 1      | 10.90       | 7.8      |
| 2      | 21.04       | 50.3     | 2      | 18.15       | 92.2     |

■ **Representative Experimental Procedure for Cu-Catalyzed Enantioselective Allylic Substitution (EAS) with Ester-Containing *trans* 1,2-Disubstituted Alkenylboron Reagents (Scheme 4):** In this section, the reactions are performed following the same representative procedure as described for Table 1. Compound **15c** and **16** are inseparable mixture by column chromatography; therefore, the yield is determined through analysis of <sup>1</sup>H NMR spectra with an internal standard. Enantioselectivity of **15c** is determined from the mixture in comparison with authentic racemic material (96:4 er shown; Chiralcel OD-H column, 100/0 hexanes/*i*-PrOH, 0.5 mL/min, 220 nm).

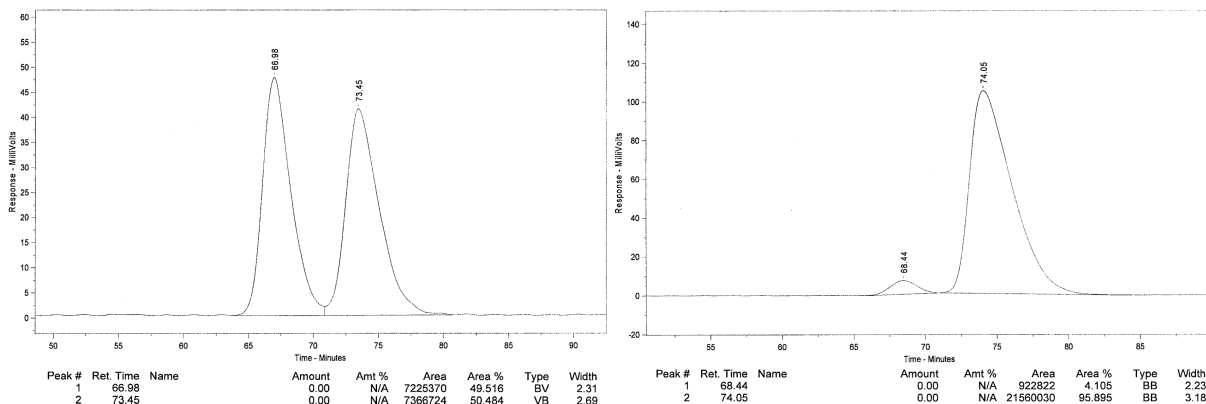

| Peak # | Time (mins) | Area (%) | Peak # | Time (mins) | Area (%) |
|--------|-------------|----------|--------|-------------|----------|
| 1      | 66.98       | 49.5     | 1      | 68.44       | 4.1      |
| 2      | 73.45       | 50.5     | 2      | 74.05       | 95.9     |

**Ethyl (*S,E*)-4-phenylhexa-2,5-dienoate (15a, Scheme 4).** IR (neat): 2980 (w), 1718 (s), 1651 (w), 1493 (w), 1452 (w), 1367 (w), 1312 (w), 1265 (m), 1231 (w), 1172 (m), 1041 (w), 986 (w), 922 (w), 700 (m)  $\text{cm}^{-1}$ ;  $^1\text{H}$  NMR (400 MHz,  $\text{CDCl}_3$ ):  $\delta$  7.32–7.29 (1H, m), 7.24–8.20 (1H, m), 7.18–7.09 (3H, m), 6.00 (1H, ddd,  $J = 17.2, 10.4, 6.8$  Hz), 5.81 (1H, dd,  $J = 16.0, 1.6$  Hz), 5.18 (1H, dd,  $J = 11.2, 1.2$  Hz), 5.09 (1H, dd,  $J = 17.2, 1.2$  Hz), 4.19–4.13 (3H, m), 1.25 (3H, t,  $J = 7.2$  Hz);  $^{13}\text{C}$  NMR (100 MHz,  $\text{CDCl}_3$ ):  $\delta$  166.6, 149.4, 140.7, 138.3, 128.9, 128.2, 127.2, 122.2, 116.9, 60.5, 51.8, 14.4; HRMS (ESI+): Calcd for  $\text{C}_{14}\text{H}_{16}\text{N}_1\text{O}_3$   $[\text{M}+\text{H}]^+$ : 217.12285, Found: 217.12381. Specific Rotation:  $[\alpha]_{\text{D}}^{20} +5.78$  ( $c$  1.45,  $\text{CHCl}_3$ ) for an enantiomerically enriched sample of 92.5:7.5 er.

Enantiomeric purity is determined by HPLC analysis in comparison with authentic racemic material (92.5:7.5 er shown; Chiralcel OJ-H column, 99.5/0.5 hexanes/*i*-PrOH, 0.5 mL/min, 220 nm).

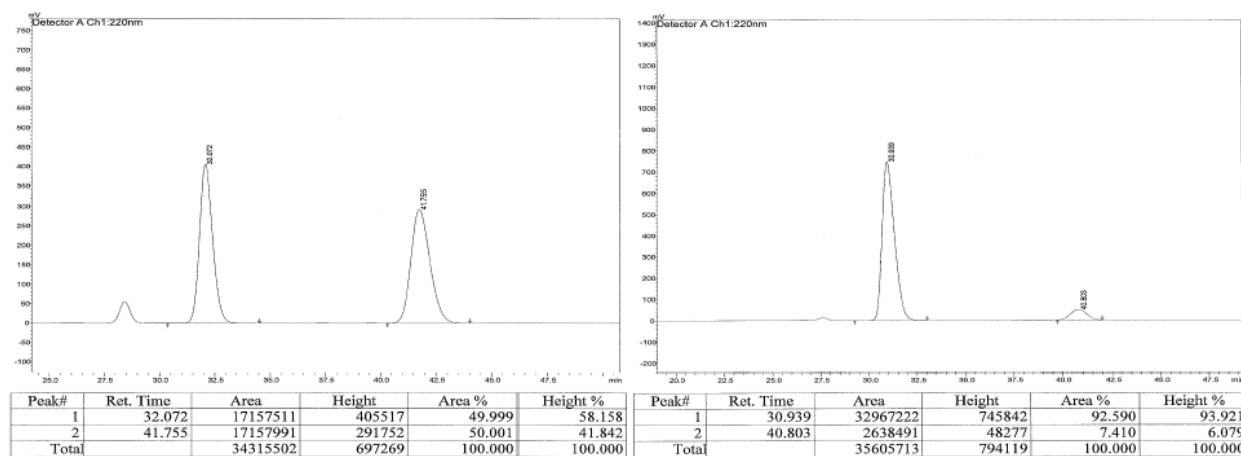

| Peak # | Time (mins) | Area (%) | Peak # | Time (mins) | Area (%) |
|--------|-------------|----------|--------|-------------|----------|
| 1      | 32.07       | 50.0     | 1      | 30.94       | 92.6     |

|   |       |      |   |       |     |
|---|-------|------|---|-------|-----|
| 2 | 41.76 | 50.0 | 2 | 40.80 | 7.4 |
|---|-------|------|---|-------|-----|

**Ethyl (*S,E*)-4-(*o*-tolyl)hexa-2,5-dienoate (15d, Scheme 4).** IR (neat): 3065 (w), 2980 (w), 1718 (s), 1650 (w), 1489 (w), 1462 (w), 1367 (w), 1309 (w), 1264 (m), 1234 (w), 1179 (m), 1040 (m), 987 (w), 922 (w), 759 (w), 729 (w)  $\text{cm}^{-1}$ ;  $^1\text{H}$  NMR (400 MHz,  $\text{CDCl}_3$ ):  $\delta$  7.22–7.11 (5H, m), 6.00 (1H, ddd,  $J = 16.4, 10.0, 6.4$  Hz), 5.80 (1H, dd,  $J = 15.6, 1.6$  Hz), 5.23 (1H, ddd,  $J = 10.4, 1.2, 1.2$  Hz), 5.07 (1H, ddd,  $J = 17.2, 1.6, 1.2$  Hz), 4.43–4.39 (1H, m), 4.19 (2H, q,  $J = 6.8$  Hz), 2.32 (3H, s), 1.27 (3H, t,  $J = 6.8$  Hz);  $^{13}\text{C}$  NMR (100 MHz,  $\text{CDCl}_3$ ):  $\delta$  166.6, 149.3, 136.6, 137.9, 136.2, 130.8, 128.0, 127.1, 126.5, 122.3, 117.0, 60.5, 47.5, 19.6, 14.4; HRMS (ESI+): Calcd for  $\text{C}_{15}\text{H}_{19}\text{O}_2$   $[\text{M}+\text{H}]^+$ : 231.13850, Found: 231.13894. Specific Rotation:  $[\alpha]_{\text{D}}^{20} +7.96$  ( $c$  0.950,  $\text{CHCl}_3$ ) for an enantiomerically enriched sample of 94:6 er.

Enantiomeric purity is determined by HPLC analysis in comparison with authentic racemic material (94:6 er shown; Chiralcel OD-H column, 99.5/0.5 hexanes/*i*-PrOH, 0.5 mL/min, 220 nm).

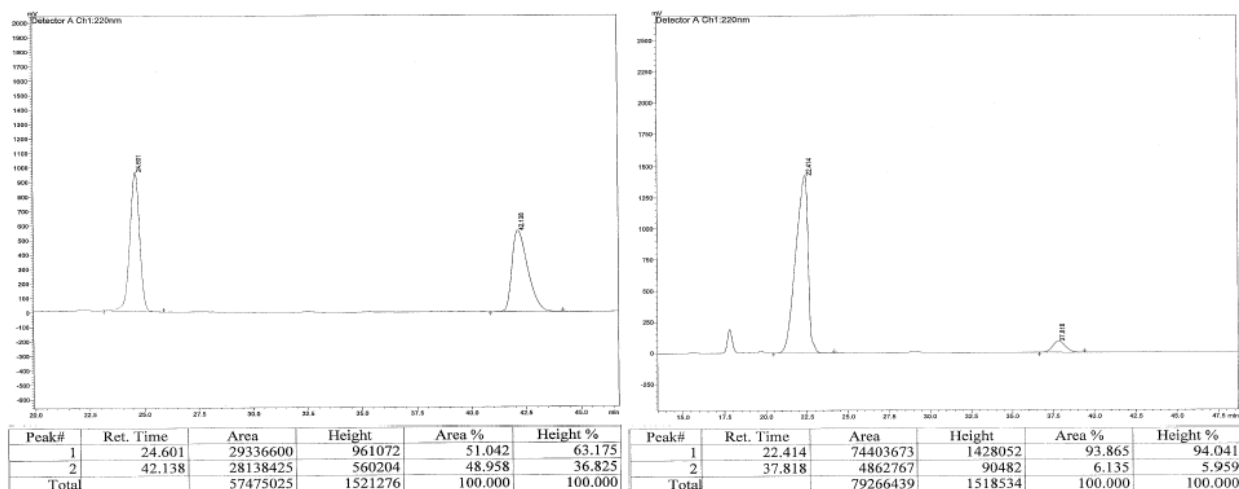

| Peak # | Time (mins) | Area (%) | Peak # | Time (mins) | Area (%) |
|--------|-------------|----------|--------|-------------|----------|
| 1      | 24.60       | 51.0     | 1      | 22.41       | 93.9     |
| 2      | 42.14       | 49.0     | 2      | 37.82       | 6.1      |

■ **Synthesis of Irregular Monoterpenoid from Enoate 17 (Scheme 4):** Enoate **17** is prepared following the procedure described in Scheme 4 with the exception that imidazolium salt **9c** is used as the optimal ligand on copper. **17** cannot be separated from alkenylboron **14** and thus the characterization is carried out after the transformation into the natural product.

To an oven-dried 2-dram vial equipped with a magnetic stir bar is charged with enoate **17** (ca. 32.0 mg, 0.141 mmol). The vessel is evacuated and refilled with  $\text{N}_2$  three times; under  $\text{N}_2$  atmosphere, diethyl ether (1.5 mL) is added through a syringe. The solution is allowed to cool to  $-78$  °C in a dry ice/acetone bath followed by dropwise addition of a solution of MeLi (353  $\mu\text{L}$ , 0.564 mmol, 1.6 M in  $\text{Et}_2\text{O}$ ) over 5 minutes. The resulting solution is allowed to stir at  $-78$  °C for an additional hour; then it is allowed to warm to 0 °C and kept stirring at this temperature for



another 30 minutes before it is quenched by addition of a saturated  $\text{NH}_4\text{Cl}$  solution (1.0 mL). The layers are separated and the aqueous layer is washed with  $\text{Et}_2\text{O}$  (3 x 1.0 mL). The combined organic layers are dried over anhydrous  $\text{MgSO}_4$ , filtered and volatiles removed under reduced pressure to afford a crude light yellow oil residue, which is purified by silica gel column chromatography (3:1 hexanes/ethyl acetate) to deliver the irregular monoterpene as colorless oil (17.0 mg, 0.100 mmol, 71% yield). **(*R,E*)-5-Methyl-2-(prop-1-en-2-yl)hex-3-ene-1,5-diol (irregular monoterpene, Scheme 4)**. The compound has been previously isolated and the spectral data match those reported.<sup>12</sup> IR (neat): 3334 (s), 2970 (s), 2922 (m), 2874 (w), 1645 (w), 1453 (w), 1374 (s), 1230 (w), 1152 (s), 1042 (s), 973 (s), 891 (s), 604 (w), 548 (w)  $\text{cm}^{-1}$ ;  $^1\text{H}$  NMR (400 MHz,  $\text{CDCl}_3$ ):  $\delta$  5.74 (1H, dd,  $J = 15.6, 0.8$  Hz), 5.56 (1H, dd,  $J = 15.6, 8.0$  Hz), 4.90 (1H, ddd,  $J = 2.8, 1.6, 1.2$  Hz), 4.81 (1H, dd,  $J = 0.8, 0.4$  Hz), 3.66 (1H, dd,  $J = 10.4, 7.2$  Hz), 3.58 (1H, dd,  $J = 10.8, 7.2$  Hz), 2.89 (1H, dt,  $J = 7.2, 7.2$  Hz), 1.73 (3H, d,  $J = 0.8$  Hz), 1.32 (6H, s);  $^{13}\text{C}$  NMR (100 MHz,  $\text{CDCl}_3$ ):  $\delta$  144.8, 140.8, 125.6, 112.5, 70.8, 63.9, 52.4, 30.1, 29.9, 20.9; HRMS (ESI+): Calcd for  $\text{C}_{10}\text{H}_{17}\text{O}_1$  [ $\text{M}+\text{H}-\text{H}_2\text{O}$ ] $^+$ : 153.12794, Found: 153.12809. Specific Rotation:  $[\alpha]_D^{20} -23.1$  ( $c$  0.267,  $\text{CHCl}_3$ ) for an enantiomerically enriched sample of 92.5:7.5 er.

Enantiomeric purity is determined by HPLC analysis in comparison with authentic racemic material (92.5:7.5 er shown; Chiralcel OD-H column, 99/1 hexanes/*i*-PrOH, 0.5 mL/min, 220 nm).

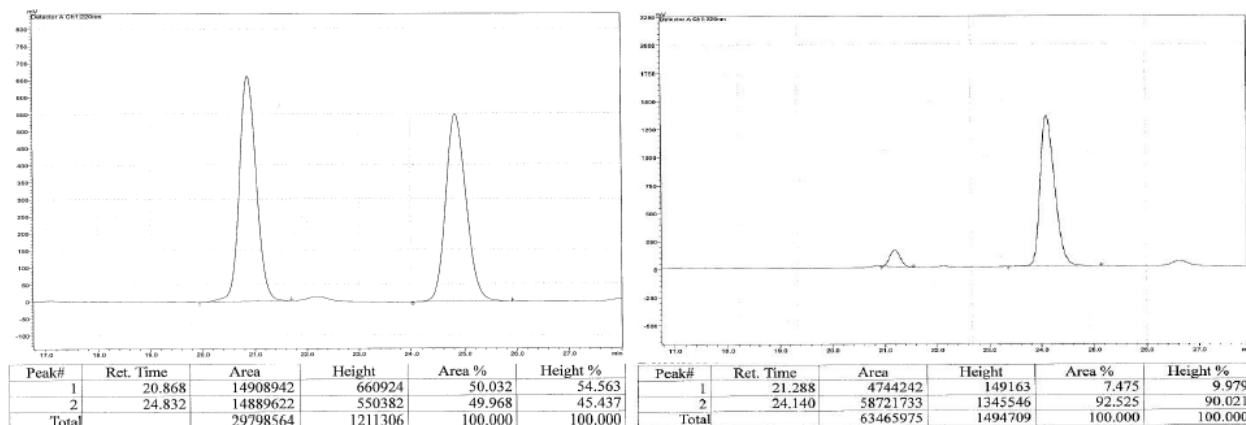

| Peak # | Time (mins) | Area (%) | Peak # | Time (mins) | Area (%) |
|--------|-------------|----------|--------|-------------|----------|
| 1      | 20.87       | 50.0     | 1      | 21.29       | 7.5      |
| 2      | 24.83       | 50.0     | 2      | 24.14       | 92.5     |

■ **Representative Experimental Procedure for NHC–Cu-Catalyzed Enantioselective Allylic Substitution (EAS) with Methyl-Substituted *cis*-1,2-Disubstituted Alkenylboron Reagents (Scheme 5)**: In this section, the reactions are performed following the same representative procedure as described for Table 1. The specific differences are included within the characterization data of each compound.

**(*S,Z*)-Hexa-1,4-dien-3-ylbenzene (19a, Scheme 5)**. The title compound is prepared in 8 h at 22 °C following the general procedure. IR (neat): 3060 (w), 3019 (w), 2974 (w), 2917 (w), 1635 (w),

1480 (m), 1462 (w), 1371 (m), 996 (m), 913 (m), 795 (w), 755 (s), 727 (m), 661 (w), 545 (w)  $\text{cm}^{-1}$ ;  $^1\text{H}$  NMR (500 MHz,  $\text{CDCl}_3$ ):  $\delta$  7.31 (2H, dd,  $J = 7.5, 7.5$  Hz), 7.26–7.19 (3H, m), 5.99 (1H, ddd,  $J = 17.0, 10.5, 6.5$  Hz), 5.65–5.55 (2H, m), 5.14–5.10 (2H, m), 4.37 (1H, dd,  $J = 7.5, 7.5$  Hz), 1.71 (3H, dd,  $J = 6.0, 1.0$  Hz);  $^{13}\text{C}$  NMR (125 MHz,  $\text{CDCl}_3$ ):  $\delta$  143.8, 140.5, 131.8, 128.6, 127.8, 126.3, 124.7, 114.7, 46.8, 13.2; HRMS (ESI+): Calcd for  $\text{C}_{12}\text{H}_{15}$   $[\text{M}+\text{H}]^+$ : 159.11738, Found: 159.11756. Specific Rotation:  $[\alpha]_{\text{D}}^{20} +17.3$  ( $c$  0.41,  $\text{CHCl}_3$ ) for an enantiomerically enriched sample of 95:5 er.

Enantiomeric purity is determined by GLC analysis in comparison with authentic racemic material (95:5 er shown; CDB/DM column, 80 °C, 15 psi).

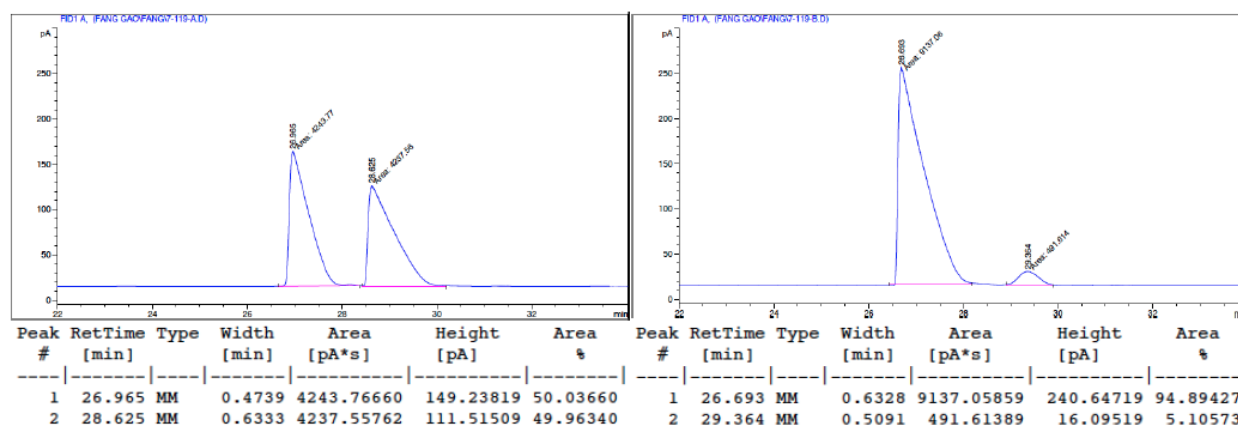

| Peak # | Time (mins) | Area (%) | Peak # | Time (mins) | Area (%) |
|--------|-------------|----------|--------|-------------|----------|
| 1      | 26.97       | 50.0     | 1      | 26.69       | 94.9     |
| 2      | 28.63       | 50.0     | 2      | 29.36       | 5.1      |

**(*S,Z*)-1-(Hexa-1,4-dien-3-yl)-3-(trifluoromethyl)benzene (19b, Scheme 5).** The title compound is prepared in 8 h at 22 °C following the general procedure. IR (neat): 3020 (w), 2980 (w), 2921 (w), 1444 (w), 1328 (s), 1248 (w), 1162 (s), 1121 (s), 1072 (s), 993 (w), 917 (m), 801 (m), 777 (w), 720 (m), 701 (s), 682 (w), 655 (w)  $\text{cm}^{-1}$ ;  $^1\text{H}$  NMR (400 MHz,  $\text{CDCl}_3$ ):  $\delta$  7.49–7.41 (4H, m), 5.97 (1H, ddd,  $J = 16.8, 10.4, 6.4$  Hz), 5.72–5.64 (1H, m), 5.58–5.52 (1H, m), 5.18–5.12 (2H, m), 4.42 (1H, dd,  $J = 8.4, 6.8$  Hz), 1.71 (3H, dd,  $J = 6.8, 2.0$  Hz);  $^{13}\text{C}$  NMR (100 MHz,  $\text{CDCl}_3$ ):  $\delta$  144.7, 139.6, 131.3, 130.9 (q,  $J = 32.0$  Hz), 130.88, 129.0, 125.7, 124.5 (q,  $J = 3.7$  Hz), 123.3 (q,  $J = 3.7$  Hz), 123.2 (q,  $J = 245.0$  Hz), 115.6, 46.5, 13.2; HRMS (ESI+): Calcd for  $\text{C}_{13}\text{H}_{14}\text{F}_3$   $[\text{M}+\text{H}]^+$ : 227.10476, Found: 227.10569. Specific Rotation:  $[\alpha]_{\text{D}}^{20} -8.76$  ( $c$  1.14,  $\text{CHCl}_3$ ) for an enantiomerically enriched sample of 98:2 er.

Enantiomeric purity is determined by GLC analysis in comparison with authentic racemic material (98:2 er shown; CDB/DM column, 80 °C, 15 psi).

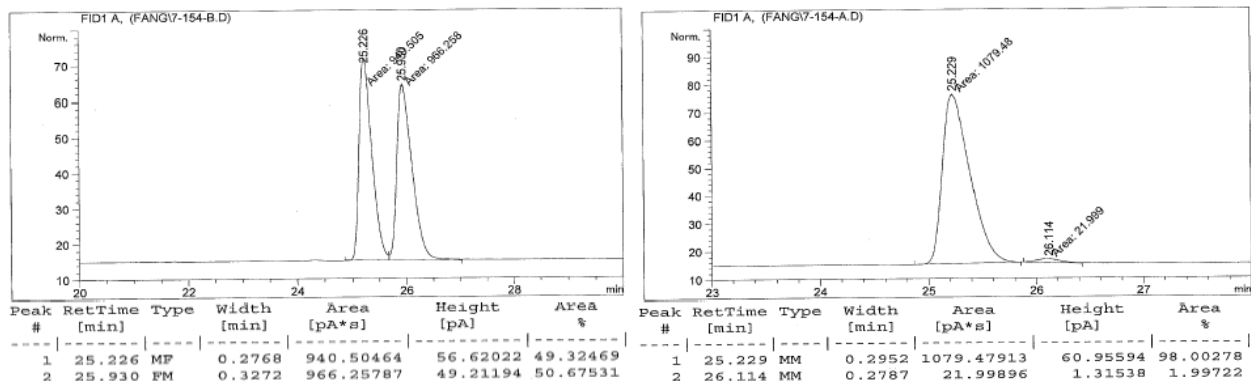

| Peak # | Time (mins) | Area (%) | Peak # | Time (mins) | Area (%) |
|--------|-------------|----------|--------|-------------|----------|
| 1      | 25.23       | 49.3     | 1      | 25.23       | 98.0     |
| 2      | 25.93       | 50.7     | 2      | 26.11       | 2.0      |

**(*S,Z*)-1-(Hexa-1,4-dien-3-yl)-2-methoxybenzene (19c, Scheme 5).** The title compound is prepared in 8 h at 22 °C following the general procedure. IR (neat): 3078 (w), 3012 (w), 2936 (w), 2835 (w), 1634 (w), 1598 (w), 1586 (w), 1490 (s), 1463 (m), 1438 (m), 1288 (w), 1238 (s), 1105 (m), 1051 (m), 1030 (s), 993 (w), 912 (m), 855 (w), 750 (s), 715 (s), 662 (m), 577 (w), 492 (w)  $\text{cm}^{-1}$ ;  $^1\text{H}$  NMR (400 MHz,  $\text{CDCl}_3$ ):  $\delta$  7.21–7.17 (2H, m), 6.92 (1H, ddd,  $J = 7.5, 7.5, 1.0$  Hz), 6.87 (1H, dd,  $J = 8.5, 1.0$  Hz), 6.04 (1H, ddd,  $J = 17.0, 10.0, 5.5$  Hz), 5.60–5.53 (2H, m), 5.11–5.05 (2H, m), 4.82–4.79 (1H, m), 3.84 (3H, s), 1.71 (3H, d,  $J = 5.0$  Hz);  $^{13}\text{C}$  NMR (100 MHz,  $\text{CDCl}_3$ ):  $\delta$  156.8, 140.7, 132.5, 131.6, 128.5, 127.3, 124.7, 120.9, 114.0, 111.0, 55.6, 39.8, 13.1; HRMS (ESI+): Calcd for  $\text{C}_{13}\text{H}_{17}\text{O}_1$   $[\text{M}+\text{H}]^+$ : 189.12794, Found: 189.12772. Specific Rotation:  $[\alpha]_{\text{D}}^{20} +87.3$  ( $c$  1.03,  $\text{CHCl}_3$ ) for an enantiomerically enriched sample of 97:3 er.

Enantiomeric purity is determined by GLC analysis in comparison with authentic racemic material (97:3 er shown; CDB/DM column, 80 °C, 15 psi).

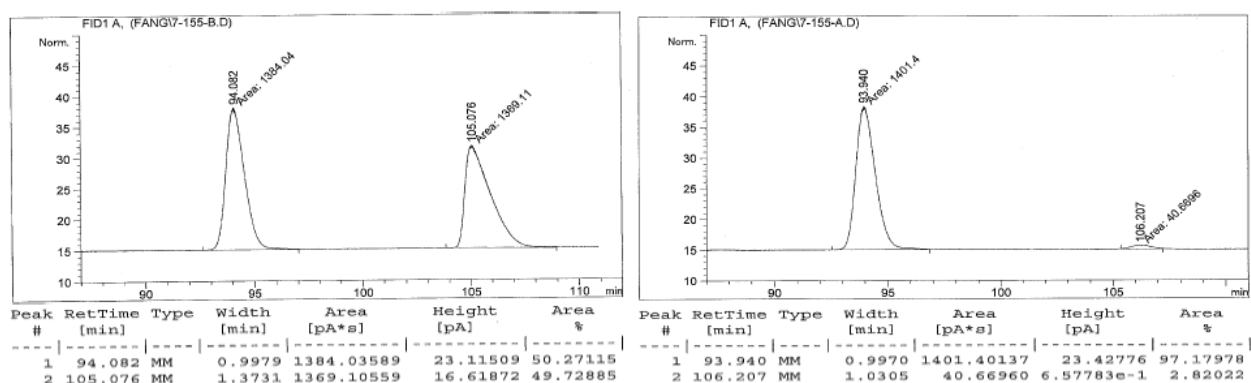

| Peak # | Time (mins) | Area (%) | Peak # | Time (mins) | Area (%) |
|--------|-------------|----------|--------|-------------|----------|
| 1      | 94.08       | 50.3     | 1      | 93.94       | 97.2     |
| 2      | 105.08      | 49.7     | 2      | 106.21      | 2.8      |

**(*S,Z*)-1-(Hexa-1,4-dien-3-yl)-2-methylbenzene (19d, Scheme 5).** The title compound is prepared in 8 h at 22 °C based on the general procedure. IR (neat): 3066 (w), 3018 (w), 2975 (w), 2916 (w), 1634 (w), 1487 (m), 1461 (m), 1396 (w), 1369 (w), 993 (m), 915 (s), 848 (w), 794 (w), 753 (s), 728 (s), 658 (w), 547 (w), 454 (m)  $\text{cm}^{-1}$ ;  $^1\text{H}$  NMR (400 MHz,  $\text{CDCl}_3$ ):  $\delta$  7.22–7.10 (4H, m), 6.02 (1H, ddd,  $J = 17.0, 10.0, 5.0$  Hz), 5.65–5.58 (1H, m), 5.51–5.46 (1H, m), 5.13–5.06 (2H, m), 4.54–4.51 (1H, m), 2.35 (3H, s), 1.70 (3H, dd,  $J = 6.5, 2.0$  Hz);  $^{13}\text{C}$  NMR (100 MHz,  $\text{CDCl}_3$ ):  $\delta$  142.1, 140.4, 135.9, 131.5, 130.5, 127.4, 126.4, 126.3, 124.9, 114.5, 43.0, 19.6, 13.2; HRMS (ESI+): Calcd for  $\text{C}_{13}\text{H}_{17}$   $[\text{M}+\text{H}]^+$ : 173.13303, Found: 173.13231. Specific Rotation:  $[\alpha]_{\text{D}}^{20} +0.67$  ( $c$  0.90,  $\text{CHCl}_3$ ) for an enantiomerically enriched sample of 98:2 er.

Enantiomeric purity is determined by GLC analysis in comparison with authentic racemic material (98:2 er shown; CDB/DM column, 80 °C, 15 psi).

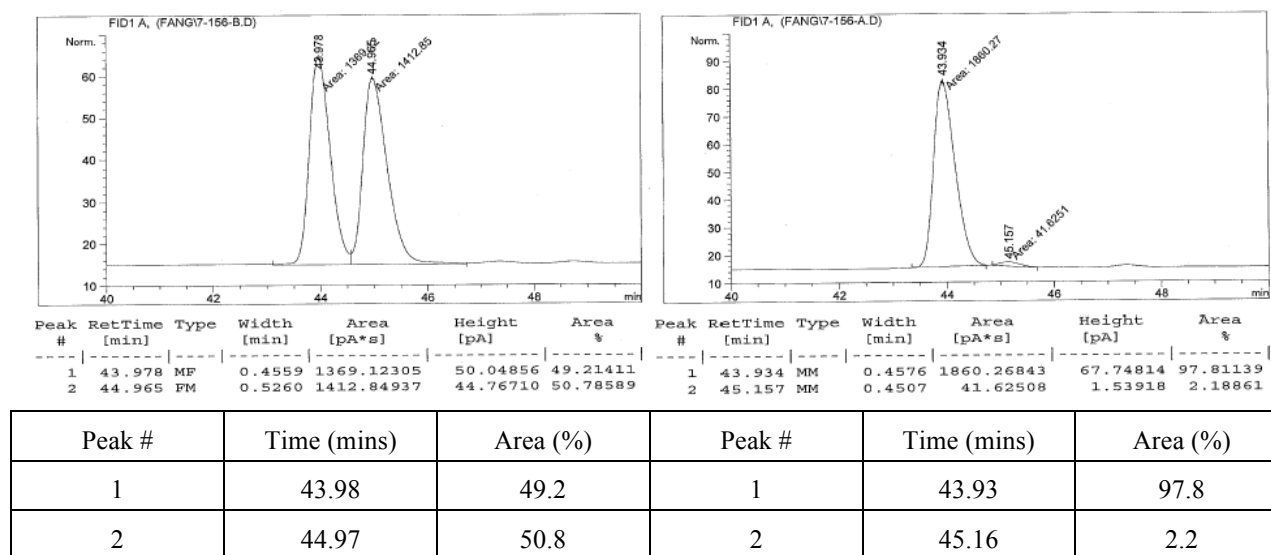

**(*R,Z*)-(2-Methylhexa-1,4-dien-3-yl)benzene (20a, Scheme 5).** The title compound with **9c** is prepared in 24 h at 22 °C following the general procedure. IR (neat): 3062 (w), 3022 (w), 2971 (w), 2917 (w), 1644 (w), 1599 (w), 1491 (w), 1450 (w), 1371 (w), 1073 (w), 1032 (w), 893 (m), 755 (m), 739 (m), 697 (s), 536 (w)  $\text{cm}^{-1}$ ;  $^1\text{H}$  NMR (400 MHz,  $\text{CDCl}_3$ ):  $\delta$  7.32–7.28 (2H, m), 7.26–7.18 (3H, m), 5.74–5.68 (1H, m), 5.66–5.58 (1H, m), 4.90–4.86 (2H, m), 4.29 (1H, d,  $J = 9.2$  Hz), 1.68 (3H, dd,  $J = 6.4, 1.6$  Hz), 1.66 (3H, dd,  $J = 0.8, 0.4$  Hz);  $^{13}\text{C}$  NMR (100 MHz,  $\text{CDCl}_3$ ):  $\delta$  147.4, 143.3, 131.9, 128.5, 128.0, 126.3, 124.9, 111.8, 50.2, 21.3, 13.1; HRMS (ESI+): Calcd for  $\text{C}_{13}\text{H}_{17}$   $[\text{M}+\text{H}]^+$ : 173.13303, Found: 173.13295. Specific Rotation:  $[\alpha]_{\text{D}}^{20} +21.2$  ( $c$  0.970,  $\text{CHCl}_3$ ) for an enantiomerically enriched sample of 91:9 er.

Enantiomeric purity is determined by GLC analysis in comparison with authentic racemic material (91:9 er shown; CDB/DM column, 60 °C, 15 psi).

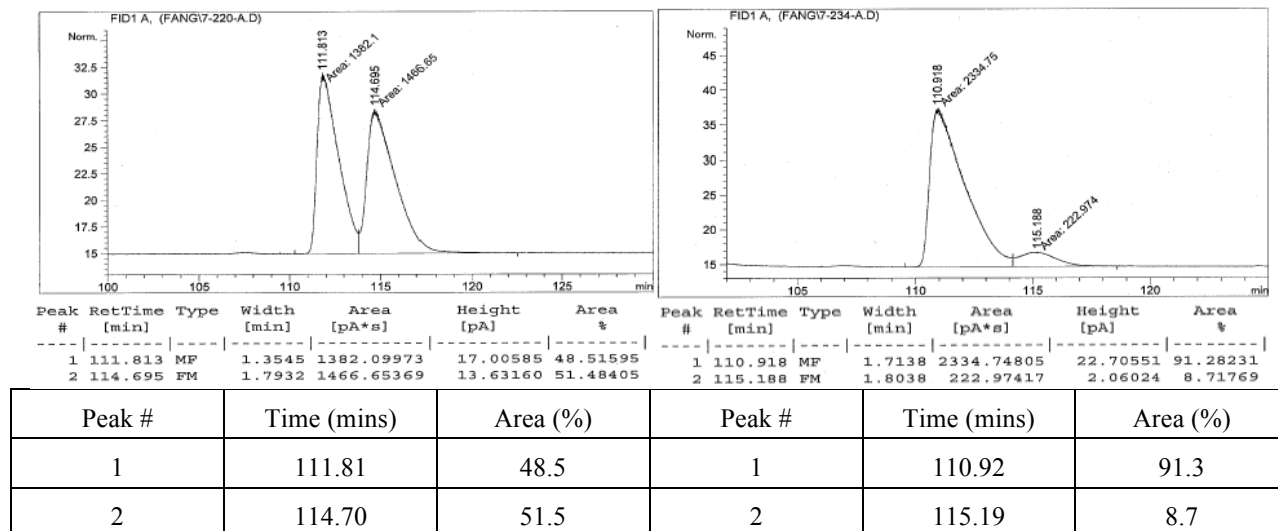

**(*R,Z*)-1-(2-Methylhexa-1,4-dien-3-yl)-4-nitrobenzene (20b, Scheme 5).** The title compound is prepared with **9c** in 24 h at 22 °C following the general procedure. IR (neat): 3078 (w), 3020 (w), 2973 (w), 2917 (w), 2856 (w), 1646 (w), 1596 (w), 1518 (s), 1448 (w), 1343 (s), 1109 (w), 1015 (w), 899 (m), 847 (m), 744 (w), 696 (m), 539 (w)  $\text{cm}^{-1}$ ;  $^1\text{H}$  NMR (500 MHz,  $\text{CDCl}_3$ ):  $\delta$  8.16 (2H, dd,  $J = 8.0, 2.5$  Hz), 7.39 (2H, dd,  $J = 8.0, 2.5$  Hz), 5.72–5.62 (2H, m), 4.95 (1H, s), 4.87 (1H, s), 4.38 (1H, d,  $J = 9.0$  Hz), 1.68 (3H, d,  $J = 6.0$  Hz), 1.65 (3H, s);  $^{13}\text{C}$  NMR (125 MHz,  $\text{CDCl}_3$ ):  $\delta$  151.1, 146.6, 145.9, 130.2, 128.9, 126.6, 123.8, 113.2, 50.1, 21.2, 13.2; HRMS (ESI+): Calcd for  $\text{C}_{13}\text{H}_{15}\text{N}_1\text{O}_2$   $[\text{M}]^+$ : 217.1103, Found: 217.1099. Specific Rotation:  $[\alpha]_{\text{D}}^{20} +147$  ( $c$  2.11,  $\text{CHCl}_3$ ) for an enantiomerically enriched sample of 95:5 er.

Enantiomeric purity is determined by HPLC analysis in comparison with authentic racemic material (95:5 er shown; Chiralcel OD-H column, 100/0 hexanes/*i*-PrOH, 0.5 mL/min, 220 nm).

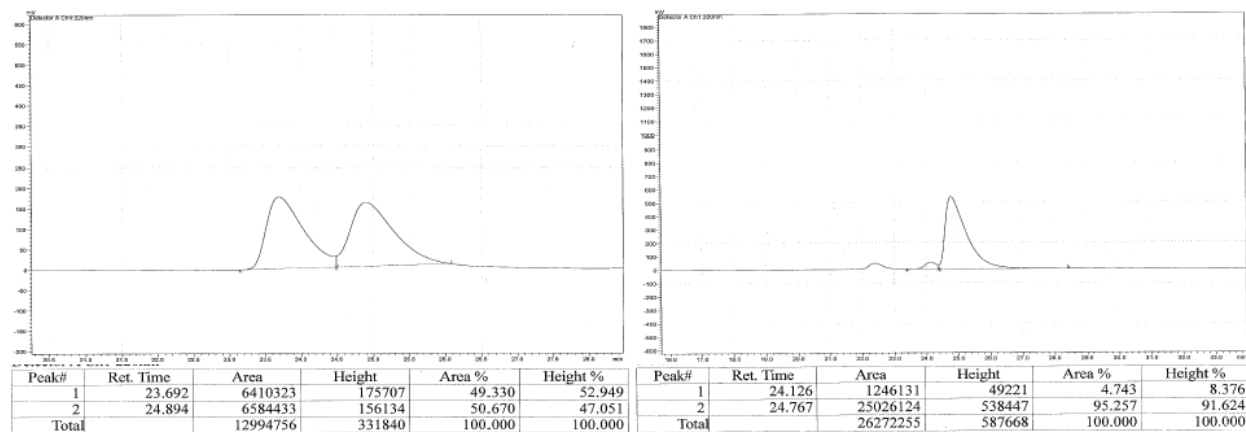

| Peak # | Time (mins) | Area (%) | Peak # | Time (mins) | Area (%) |
|--------|-------------|----------|--------|-------------|----------|
| 1      | 23.69       | 49.3     | 1      | 24.13       | 4.7      |
| 2      | 24.89       | 50.7     | 2      | 24.77       | 95.3     |

**(*R,Z*)-1-Methyl-2-(2-methylhexa-1,4-dien-3-yl)benzene (20c, Scheme 5).** The title compound with **9c** is prepared in 24 h at 22 °C based on the general procedure. IR (neat): 3067 (w), 3018 (w), 2970 (w), 2915 (w), 2858 (w), 1646 (w), 1487 (m), 1449 (m), 1371 (w), 1052 (w), 1033 (w), 894 (s), 751 (s), 721 (s), 705 (s), 463 (w)  $\text{cm}^{-1}$ ;  $^1\text{H}$  NMR (500 MHz,  $\text{CDCl}_3$ ):  $\delta$  7.21–7.09 (4H, m), 5.62–5.56 (2H, m), 4.89 (1H, s), 4.76 (1H, s), 4.39 (1H, d,  $J = 6.5$  Hz), 2.33 (3H, s), 1.68–1.66 (6H, m);  $^{13}\text{C}$  NMR (125 MHz,  $\text{CDCl}_3$ ):  $\delta$  147.3, 141.6, 136.3, 132.3, 130.4, 127.4, 126.2, 126.1, 124.7, 111.7, 46.4, 22.3, 19.7, 13.2; HRMS (ESI+): Calcd for  $\text{C}_{14}\text{H}_{18}$   $[\text{M}]^+$ : 186.1409, Found: 186.1408. Specific Rotation:  $[\alpha]_{\text{D}}^{20} +130$  ( $c$  1.31,  $\text{CHCl}_3$ ) for an enantiomerically enriched sample of 87:13 er.

Enantiomeric purity is determined by GLC analysis in comparison with authentic racemic material (87:13 er shown; CDB/DM column, 80 °C, 15 psi).

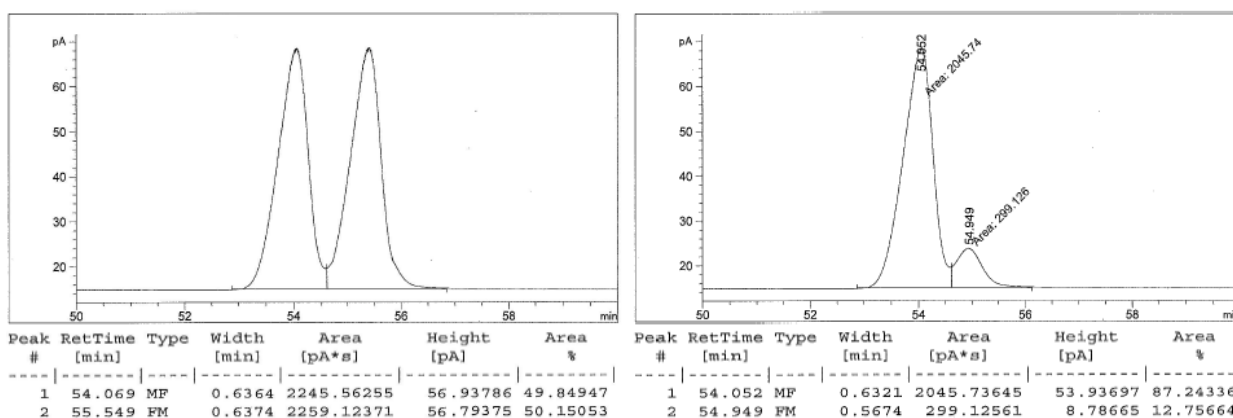

| Peak # | Time (mins) | Area (%) | Peak # | Time (mins) | Area (%) |
|--------|-------------|----------|--------|-------------|----------|
| 1      | 54.07       | 49.8     | 1      | 54.05       | 87.2     |
| 2      | 55.55       | 50.2     | 2      | 54.95       | 12.8     |

**Methyl (*S,Z*)-2-methylene-3-(*p*-tolyl)hex-4-enoate (21a, Scheme 5).** The title compound is prepared with 1.0 mol % **9b**, 10 mol %  $\text{CuCl}$  and 1.5 equiv  $\text{NaOMe}$  in 24 h at 60 °C following the general procedure. IR (neat): 3019 (w), 2950 (w), 2921 (w), 1721 (s), 1627 (w), 1512 (m), 1436 (m), 1315 (m), 1244 (s), 1190 (m), 1144 (s), 945 (m), 811 (s), 740 (s), 680 (w), 529 (m)  $\text{cm}^{-1}$ ;  $^1\text{H}$  NMR (400 MHz,  $\text{CDCl}_3$ ):  $\delta$  7.12–7.08 (4H, m), 6.28 (1H, dd,  $J = 1.2, 0.8$  Hz), 5.66–5.56 (3H, m), 4.86 (1H, d,  $J = 8.0$  Hz), 3.68 (3H, d,  $J = 0.8$  Hz), 2.30 (3H, s), 1.70 (3H, dd,  $J = 5.6, 0.8$  Hz);  $^{13}\text{C}$  NMR (100 MHz,  $\text{CDCl}_3$ ):  $\delta$  167.5, 143.4, 139.9, 136.0, 131.5, 129.3, 127.7, 125.5, 125.2, 52.0, 44.0, 21.2, 13.2; HRMS (ESI+): Calcd for  $\text{C}_{15}\text{H}_{19}\text{O}_2$   $[\text{M}+\text{H}]^+$ : 231.13850, Found: 231.13787. Specific Rotation:  $[\alpha]_{\text{D}}^{20} -17.8$  ( $c$  1.40,  $\text{CHCl}_3$ ) for an enantiomerically enriched sample of 96:4 er.

Enantiomeric purity is determined by HPLC analysis in comparison with authentic racemic material (95.5:4.5 er shown; Chiralcel OD-H column, 100/0 hexanes/*i*-PrOH, 0.5 mL/min, 220 nm).

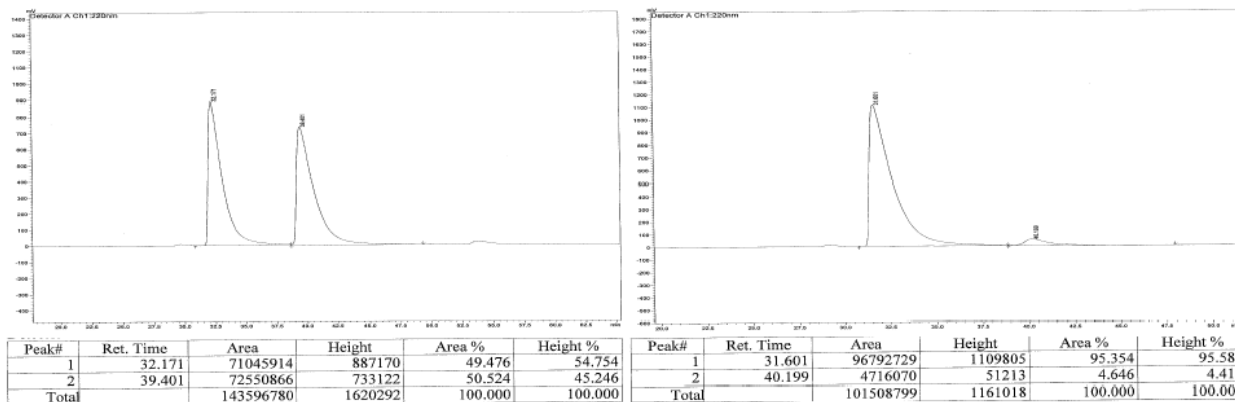

| Peak # | Time (mins) | Area (%) | Peak # | Time (mins) | Area (%) |
|--------|-------------|----------|--------|-------------|----------|
| 1      | 32.17       | 49.5     | 1      | 31.60       | 95.4     |
| 2      | 39.40       | 50.5     | 2      | 40.20       | 4.6      |

**Methyl (*S,Z*)-2-methylene-3-(4-(trifluoromethyl)phenyl)hex-4-enoate (21b, Scheme 5).** The title compound is prepared with 1.0 mol % **9b**, 10 mol % CuCl and 1.5 equiv NaOMe in 24 h at 60 °C based on the general procedure. IR (neat): 3021 (w), 2954 (w), 2917 (w), 2849 (w), 1723 (s), 1617 (w), 1438 (w), 1418 (w), 1324 (s), 1251 (w), 1162 (m), 1121 (s), 1068 (s), 1019 (w), 953 (w), 832 (w), 733 (w), 604 (w)  $\text{cm}^{-1}$ ;  $^1\text{H}$  NMR (500 MHz,  $\text{CDCl}_3$ ):  $\delta$  7.54 (2H, d,  $J = 8.0$  Hz), 7.33 (2H, d,  $J = 8.0$  Hz), 6.35 (1H, d,  $J = 2.5$  Hz), 5.71–5.56 (3H, m), 4.93 (1H, d,  $J = 9.0$  Hz), 3.68 (3H, s), 1.70 (3H, dd,  $J = 6.5, 2.0$  Hz);  $^{13}\text{C}$  NMR (125 MHz,  $\text{CDCl}_3$ ):  $\delta$  167.0, 147.1, 142.4, 128.6 (q,  $J = 32$  Hz), 128.2, 126.7, 126.2, 125.6 (q,  $J = 3.7$  Hz), 124.2 (q,  $J = 269$  Hz), 52.1, 44.3, 13.3; HRMS (ESI+): Calcd for  $\text{C}_{15}\text{H}_{15}\text{F}_3\text{O}_2$   $[\text{M}]^+$ : 284.1024, Found: 284.1029. Specific Rotation:  $[\alpha]_D^{20} +135$  ( $c$  1.70,  $\text{CHCl}_3$ ) for an enantiomerically enriched sample of 97:3 er.

Enantiomeric purity is determined by HPLC analysis in comparison with authentic racemic material (97:3 er shown; Chiralcel OD-H column, 100/0 hexanes/*i*-PrOH, 0.5 mL/min, 220 nm).

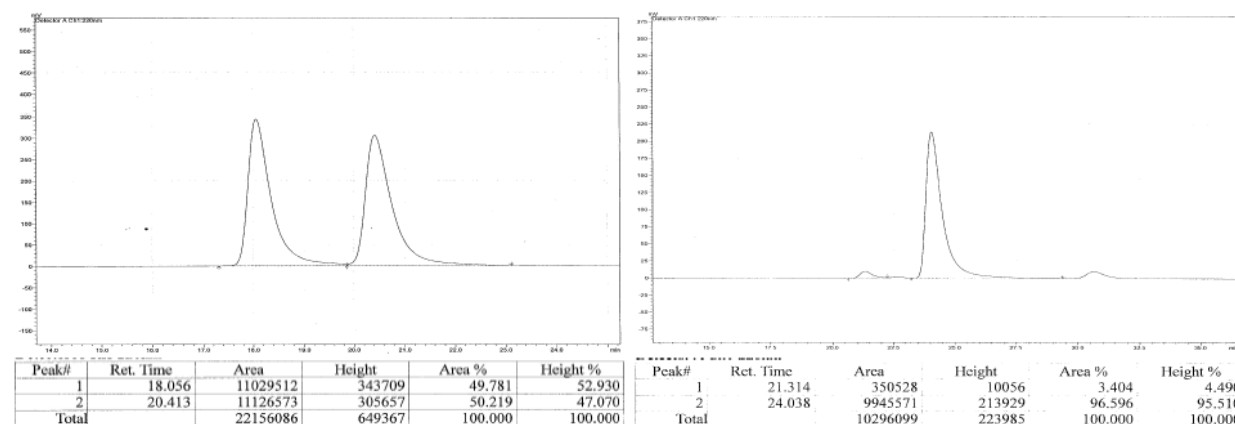

| Peak # | Time (mins) | Area (%) | Peak # | Time (mins) | Area (%) |
|--------|-------------|----------|--------|-------------|----------|
| 1      | 18.06       | 49.8     | 1      | 21.31       | 3.4      |

|   |       |      |   |       |      |
|---|-------|------|---|-------|------|
| 2 | 20.41 | 50.2 | 2 | 24.04 | 96.6 |
|---|-------|------|---|-------|------|

**Methyl (*S,Z*)-3-(2-(methoxymethoxy)phenyl)-2-methylenehex-4-enoate (21c, Scheme 5).** The title compound is prepared with 1.0 mol % **9b**, 10 mol % CuCl and 1.5 equiv NaOMe in 24 h at 60 °C following the general procedure. IR (neat): 2951 (w), 2917 (w), 2849 (w), 2826 (w), 1722 (s), 1488 (m), 1403 (m), 1317 (w), 1231 (s), 1200 (m), 1150 (s), 1078 (m), 1001 (s), 923 (w), 754 (m) cm<sup>-1</sup>; <sup>1</sup>H NMR (500 MHz, CDCl<sub>3</sub>): δ 7.17–7.14 (2H, m), 7.06 (1H, d, *J* = 8.0 Hz), 6.94 (1H, dd, *J* = 8.0, 7.5 Hz), 6.25 (1H, s), 5.64–5.50 (3H, m), 5.30 (1H, d, *J* = 9.5 Hz), 5.20 (2H, s), 3.68 (3H, s), 3.46 (3H, s), 1.71 (3H, d, *J* = 6.5 Hz); <sup>13</sup>C NMR (125 MHz, CDCl<sub>3</sub>): δ 167.5, 154.3, 143.4, 132.0, 130.8, 128.1, 127.6, 125.9, 124.9, 121.8, 114.3, 94.3, 66.0, 56.1, 52.0, 13.2; HRMS (ESI+): Calcd for C<sub>16</sub>H<sub>20</sub>O<sub>4</sub> [M]<sup>+</sup>: 276.1362, Found: 276.1368. Specific Rotation: [α]<sub>D</sub><sup>20</sup> +98.3 (*c* 2.54, CHCl<sub>3</sub>) for an enantiomerically enriched sample of 97:3 er.

Enantiomeric purity is determined by HPLC analysis in comparison with authentic racemic material (97:3 er shown; Chiralcel OD-H column, 99.5/0.5 hexanes/*i*-PrOH, 0.5 mL/min, 220 nm).

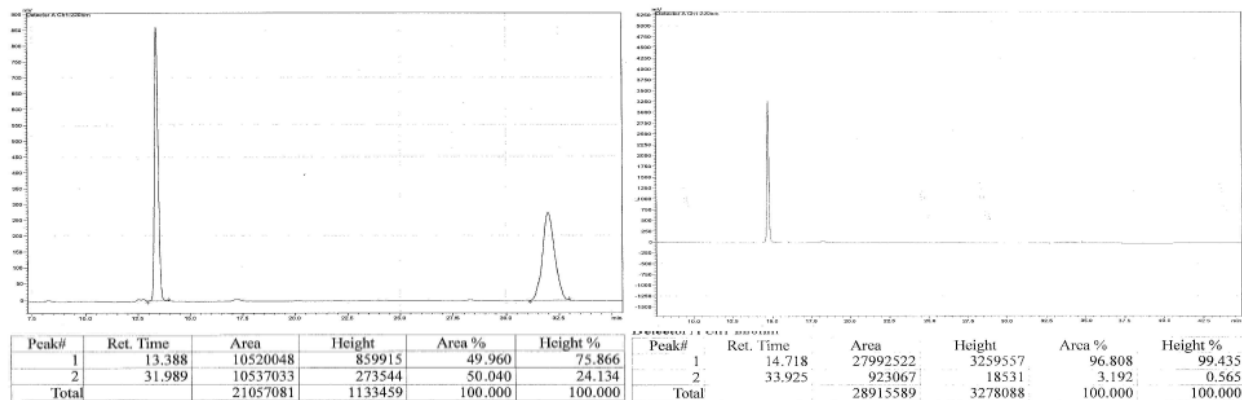

| Peak # | Time (mins) | Area (%) | Peak # | Time (mins) | Area (%) |
|--------|-------------|----------|--------|-------------|----------|
| 1      | 13.39       | 50.0     | 1      | 14.72       | 96.8     |
| 2      | 31.99       | 50.0     | 2      | 33.93       | 3.2      |

■ **Experimental Procedure for NHC–Cu-Catalyzed Enantioselective Allylic Substitution (EAS) with Alkyl-Substituted *cis*-1,2-Disubstituted Alkenylboron Reagents (Scheme 6):** In this section, the reactions are performed following the same representative procedure as described for Table 1. The specific differences are included within the characterization data of each compound.

**(*S,Z*)-*tert*-Butyl((4-(2,5-dimethoxy-4-methylphenyl)hexa-2,5-dien-1-yl)oxy)dimethylsilane (25, Scheme 6).** The title compound is prepared in the presence of 1.5 equiv of the corresponding alkenylboron reagent (96% *Z*) and 1.5 equiv of NaOMe based on the same representative procedure. IR (neat): 2952 (w), 2929 (w), 2855 (w), 1502 (m), 1464 (m), 1396 (m), 1252 (w), 1205 (s), 1087 (s), 1046 (s), 1004 (m), 914 (w), 834 (s), 774 (s), 715 (w) cm<sup>-1</sup>; <sup>1</sup>H NMR (400 MHz, CDCl<sub>3</sub>): δ 6.68 (1H, s), 6.63 (1H, s), 6.00 (1H, ddd, *J* = 17.6, 10.0, 5.2 Hz),



5.63–5.53 (2H, m), 5.12–5.08 (2H, m), 4.67 (1H, dd,  $J = 8.8, 7.2$  Hz), 4.39 (1H, dd,  $J = 13.6, 5.2$  Hz), 4.28 (1H, dd,  $J = 14.0, 4.4$  Hz), 3.774 (3H, s), 3.769 (3H, s), 2.20 (3H, s), 0.90 (9H, s), 0.07 (6H, s);  $^{13}\text{C}$  NMR (100 MHz,  $\text{CDCl}_3$ ):  $\delta$  152.0, 150.4, 140.4, 130.8, 130.6, 129.7, 125.4, 114.6, 114.5, 111.0, 60.0, 56.4, 56.2, 40.3, 26.1, 18.5, 16.3,  $-4.98, -5.00$ ; HRMS (ESI+): Calcd for  $\text{C}_{21}\text{H}_{35}\text{O}_3\text{Si}_1$   $[\text{M}+\text{H}]^+$ : 363.23555, Found: 363.23475. Specific Rotation:  $[\alpha]_{\text{D}}^{20} +85.5$  ( $c$  1.17,  $\text{CHCl}_3$ ) for an enantiomerically enriched sample of 99:1 er. Enantiomeric purity is determined by HPLC analysis of the derived *Z* allylic alcohol (see below).

**(*S,Z*)-4-(2,5-Dimethoxy-4-methylphenyl)hexa-2,5-dien-1-ol (S2, Scheme 6).** To a 2-dram vial equipped with a magnetic stir bar is charged with **25** (27.4 mg, 0.0756 mmol). The vessel is evacuated and refilled with  $\text{N}_2$  three times; under  $\text{N}_2$  atmosphere, tetrahydrofuran (thf, 1.0 mL) is added through a syringe. The solution is allowed to cool to  $0^\circ\text{C}$  in an ice bath followed by dropwise addition of tetrabutylammonium fluoride solution (151  $\mu\text{L}$ , 0.151 mmol, 1.0 M in thf). The resulting light yellow solution is allowed to warm to  $22^\circ\text{C}$  and stir for an additional 30 minutes before it is quenched by addition of saturated  $\text{NH}_4\text{Cl}$  solution (1.0 mL). The layers are separated and the aqueous layer is washed with EtOAc (3 x 1.0 mL). The combined organic layers are dried over anhydrous  $\text{MgSO}_4$ , filtered and volatiles removed under reduced pressure to afford a crude yellowish oil residue, which is purified by silica gel column chromatography (3:1 hexanes/EtOAc) to deliver **S2** as colorless oil (18.8 mg, 0.0756 mmol, >98% yield). IR (neat): 3371 (m), 2997 (w), 2933 (w), 2848 (w), 1501 (m), 1464 (m), 1395 (m), 1316 (w), 1236 (w), 1205 (s), 1041 (s), 915 (m), 861 (w), 767 (w), 695 (w)  $\text{cm}^{-1}$ ;  $^1\text{H}$  NMR (400 MHz,  $\text{CDCl}_3$ ):  $\delta$  6.71 (1H, s), 6.65 (1H, s), 6.04 (1H, ddd,  $J = 16.8, 10.4, 4.8$  Hz), 5.76 (1H, dddd,  $J = 11.2, 7.6, 6.4, 0.8$  Hz), 5.60 (1H, dddd,  $J = 10.4, 10.4, 1.2, 1.2$  Hz), 5.18–5.12 (2H, m), 4.83–4.80 (1H, m), 4.35 (1H, dd,  $J = 12.4, 7.6$  Hz), 4.17–4.11 (1H, m), 3.81 (3H, s), 3.78 (3H, s), 2.20 (3H, s), 1.78 (1H, bs);  $^{13}\text{C}$  NMR (100 MHz,  $\text{CDCl}_3$ ):  $\delta$  152.3, 150.1, 140.2, 133.9, 129.3, 128.6, 125.7, 115.2, 114.8, 110.8, 58.6, 56.6, 56.2, 39.7, 16.3; HRMS (ESI+): Calcd for  $\text{C}_{15}\text{H}_{19}\text{O}_2$   $[\text{M}+\text{H}-\text{H}_2\text{O}]^+$ : 231.13850, Found: 231.13793. Specific Rotation:  $[\alpha]_{\text{D}}^{20} +198.2$  ( $c$  1.05,  $\text{CHCl}_3$ ) for an enantiomerically enriched sample of 99:1 er.

Enantiomeric purity is determined by HPLC analysis in comparison with authentic racemic material (99:1 er shown; Chiralcel OD-H column, 99/1 hexanes/*i*-PrOH, 0.8 mL/min, 220 nm).

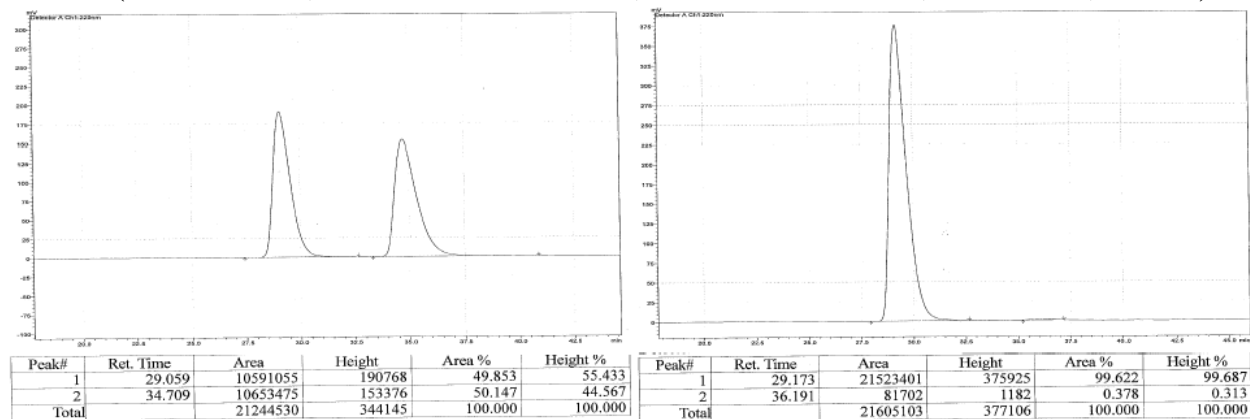

| Peak # | Time (mins) | Area (%) | Peak # | Time (mins) | Area (%) |
|--------|-------------|----------|--------|-------------|----------|
| 1      | 29.06       | 49.9     | 1      | 29.17       | 99.6     |
| 2      | 34.71       | 50.1     | 2      | 36.19       | 0.4      |

**(*S,Z*)-4-(2,5-Dimethoxy-4-methylphenyl)hexa-2,5-dienal (26, Scheme 6).** To a 2-dram vial equipped with a magnetic stir bar is charged with **S2** (18.8 mg, 0.0756 mmol) and solid sodium bicarbonate (50.8 mg, 0.605 mmol). The vessel is evacuated and refilled with N<sub>2</sub> three times; under N<sub>2</sub> atmosphere, CH<sub>2</sub>Cl<sub>2</sub> (1.0 mL) is added through a syringe. The solution is allowed to cool to 0 °C in an ice bath followed by addition of Dess-Martin periodinane (48.1 mg, 0.113 mmol) in one portion as a solid. The resulting white suspension is allowed to stir for an additional 60 minutes before the reactions is quenched by passing the suspension through a celite plug eluted with EtOAc. The volatiles are removed under reduced pressure to afford colorless oil residue, which is purified by silica gel column chromatography (8:1 hexanes/EtOAc) to deliver **26** as colorless oil (14.5 mg, 0.0590 mmol, 78% yield). IR (neat): 2936 (w), 2849 (w), 2831 (w), 1767 (w), 1678 (s), 1504 (m), 1466 (m), 1397 (m), 1207 (s), 1044 (s), 998 (w), 921 (w), 863 (w), 785 (s), 697 (m) cm<sup>-1</sup>; <sup>1</sup>H NMR (400 MHz, CDCl<sub>3</sub>): δ 10.25 (1H, d, *J* = 8.0 Hz), 6.70 (1H, s), 6.67 (1H, s), 6.60 (1H, dd, *J* = 11.2, 11.2 Hz), 6.11 (1H, ddd, *J* = 17.6, 10.4, 5.2 Hz), 5.93 (1H, dd, *J* = 10.8, 8.0 Hz), 5.46–5.42 (1H, m), 5.28 (1H, d, *J* = 10.8 Hz), 5.20 (1H, d, *J* = 17.2 Hz), 3.79 (3H, s), 3.76 (3H, s), 2.21 (3H, s); <sup>13</sup>C NMR (100 MHz, CDCl<sub>3</sub>): δ 192.2, 152.1, 151.4, 150.5, 138.6, 129.0, 126.8, 126.6, 116.8, 114.2, 110.7, 56.3, 56.0, 40.2, 16.4; HRMS (ESI+): Calcd for C<sub>15</sub>H<sub>19</sub>O<sub>3</sub> [M+H]<sup>+</sup>: 247.13342, Found: 247.13346. Specific Rotation: [α]<sub>D</sub><sup>20</sup> +297 (*c* 0.327, CHCl<sub>3</sub>) for an enantiomerically enriched sample of 99:1 er. Enantiomeric purity is further confirmed by converting the title compound to the corresponding enone **S3**, Scheme 8 (see below).

**(*S,Z*)-(11-Bromoundeca-1,4-dien-3-yl)benzene (27a, Scheme 6).** The title compound is prepared with 1.0 equiv of the alkenylboron reagent (96% *Z*) as the limiting reagent, 1.25 equiv of NaOMe and 1.25 equiv of the corresponding allylic phosphate following the same representative procedure. The compound was characterized with 6% *E* isomer. IR (neat): 3081 (w), 3006 (w), 2929 (m), 2855 (m), 1634 (w), 1600 (w), 1492 (w), 1451 (w), 1256 (w), 1230 (w), 944 (w), 915 (m), 851 (w), 741 (m), 699 (s), 563 (w) cm<sup>-1</sup>; <sup>1</sup>H NMR (400 MHz, CDCl<sub>3</sub>): δ 7.33–7.28 (2H, m), 7.26–7.18 (3H, m), 5.99 (1H, ddd, *J* = 17.6, 10.0, 6.4 Hz), 5.58–5.48 (2H, m), 5.14–5.08 (2H, m), 4.34 (1H, dd, *J* = 6.8, 6.8 Hz), 3.39 (2H, t, *J* = 7.2 Hz), 2.19–2.09 (2H, m), 1.87–1.80 (2H, m), 1.46–1.26 (6H, m); <sup>13</sup>C NMR (100 MHz, CDCl<sub>3</sub>): δ 143.8, 140.7, 131.0, 130.5, 128.6, 127.8, 126.4, 114.8, 47.1, 34.1, 32.9, 29.4, 28.5, 28.2, 27.4; HRMS (ESI+): Calcd for C<sub>17</sub>H<sub>24</sub>Br [M+H]<sup>+</sup>: 307.10614, Found: 307.10584. Specific Rotation: [α]<sub>D</sub><sup>20</sup> +57.5 (*c* 0.740, CHCl<sub>3</sub>) for an enantiomerically enriched sample of 96:4 er.

Enantiomeric purity is determined by HPLC analysis in comparison with authentic racemic material (96:4 er shown; Chiralcel OD-H column, 100/0 hexanes/*i*-PrOH, 0.5 mL/min, 220 nm).

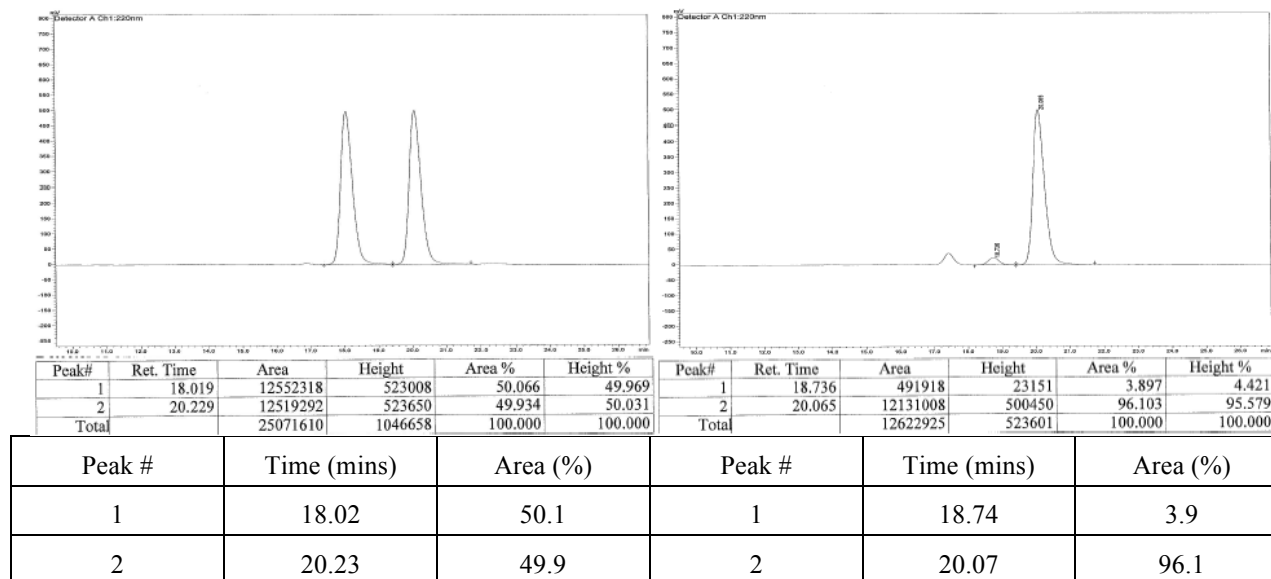

**(*S,Z*)-1-Methoxy-4-(((9-phenylundeca-7,10-dien-1-yl)oxy)methyl)benzene (27b, Scheme 6).**

The title compound is prepared with 1.0 equiv of the alkenylboron reagent (97% *Z*) as the limiting reagent, 1.25 equiv of NaOMe and 1.25 equiv of the corresponding allylic phosphate following the same representative procedure. The compound was characterized with 7% *E* isomer. IR (neat): 3057 (w), 2930 (m), 2854 (m), 1612 (w), 1512 (s), 1453 (w), 1362 (w), 1301 (w), 1246 (s), 1172 (w), 1097 (m), 1036 (m), 914 (w), 820 (m), 741 (m), 699 (s)  $\text{cm}^{-1}$ ;  $^1\text{H}$  NMR (400 MHz,  $\text{CDCl}_3$ ):  $\delta$  7.32–7.17 (7H, m), 6.88 (2H, d,  $J = 8.8$  Hz), 6.03–5.95 (1H, m), 5.57–5.48 (2H, m), 5.13–5.09 (2H, m), 4.43 (2H, s), 4.34 (1H, dd,  $J = 7.6, 7.6$  Hz), 3.80 (3H, s), 3.42 (2H, t,  $J = 6.8$  Hz), 2.17–2.07 (2H, m), 1.59 (2H, dt,  $J = 13.2, 6.0$  Hz), 1.44–1.26 (6H, m);  $^{13}\text{C}$  NMR (100 MHz,  $\text{CDCl}_3$ ):  $\delta$  159.2, 143.9, 140.7, 131.0, 130.8, 130.7, 129.4, 128.6, 127.8, 126.3, 114.7, 113.9, 72.7, 70.3, 55.4, 47.1, 29.9, 29.6, 29.3, 27.5, 26.2; HRMS (ESI+): Calcd for  $\text{C}_{25}\text{H}_{33}\text{O}_2$   $[\text{M}+\text{H}]^+$ : 365.24806, Found: 365.24830. Specific Rotation:  $[\alpha]_{\text{D}}^{20} +41.2$  (c 0.650,  $\text{CHCl}_3$ ) for an enantiomerically enriched sample of 99:1 er.

Enantiomeric purity is determined by HPLC analysis in comparison with authentic racemic material (99:1 er shown; Chiralcel OD-H column, 99.5/0.5 hexanes/*i*-PrOH, 0.5 mL/min, 220 nm).

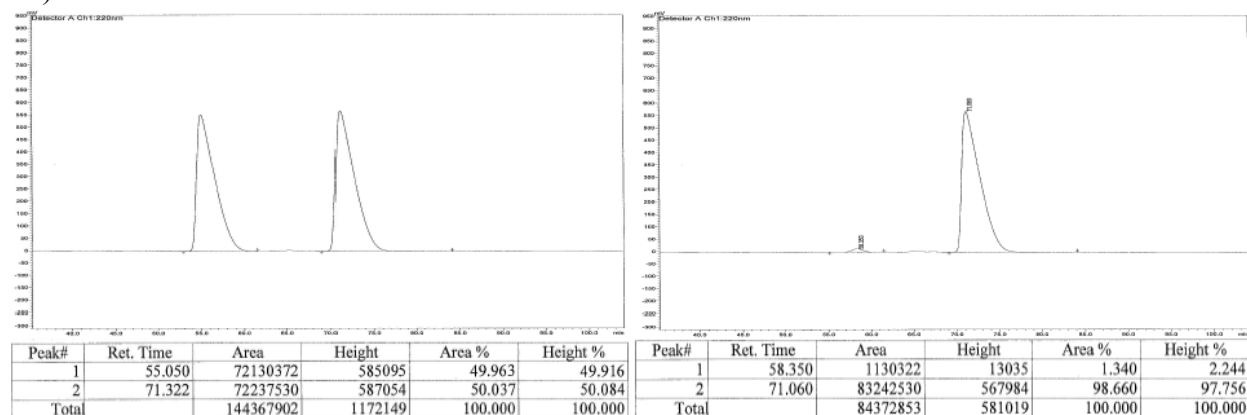

| Peak # | Time (mins) | Area (%) | Peak # | Time (mins) | Area (%) |
|--------|-------------|----------|--------|-------------|----------|
| 1      | 55.05       | 50.0     | 1      | 58.35       | 1.3      |
| 2      | 71.32       | 50.0     | 2      | 71.06       | 98.7     |

**(*S,Z*)-(1-Butoxypenta-1,4-dien-3-yl)benzene (27c, Scheme 6).** The title compound is prepared in the presence of 1.5 equiv of the corresponding alkenylboron reagent (>98% *Z*) and 1.5 equiv of NaOMe based the representative procedure. IR (neat): 3083 (w), 3029 (w), 2959 (m), 2931 (m), 2872 (m), 1660 (m), 1492 (w), 1452 (w), 1372 (w), 1275 (w), 1102 (s), 994 (w), 913 (m), 744 (m), 699 (s)  $\text{cm}^{-1}$ ;  $^1\text{H}$  NMR (400 MHz,  $\text{CDCl}_3$ ):  $\delta$  7.31–7.24 (4H, m), 7.21–7.16 (1H, m), 6.07–5.97 (2H, m), 5.13 (1H, ddd,  $J = 17.6, 1.6, 1.2$  Hz), 5.08 (1H, ddd,  $J = 10.4, 2.0, 1.2$  Hz), 4.58–4.57 (2H, m), 3.76 (2H, dddd,  $J = 16.8, 12.4, 9.6, 6.4$  Hz), 1.64–1.57 (2H, m), 1.44–1.35 (2H, m), 0.93 (3H, t,  $J = 7.6$  Hz);  $^{13}\text{C}$  NMR (100 MHz,  $\text{CDCl}_3$ ):  $\delta$  145.3, 144.4, 141.1, 128.5, 127.7, 126.2, 114.2, 108.0, 72.3, 44.0, 32.0, 19.2, 14.0; HRMS (ESI+): Calcd for  $\text{C}_{14}\text{H}_{17}\text{O}_2$   $[\text{M}+\text{H}]^+$ : 217.15924, Found: 217.15902. Specific Rotation:  $[\alpha]_{\text{D}}^{20} +79.2$  ( $c$  1.64,  $\text{CHCl}_3$ ) for an enantiomerically enriched sample of 99:1 er.

Enantiomeric purity is determined by HPLC analysis in comparison with authentic racemic material (99:1 er shown; Chiralcel OD-H column, 100/0 hexanes/*i*-PrOH, 0.5 mL/min, 220 nm).

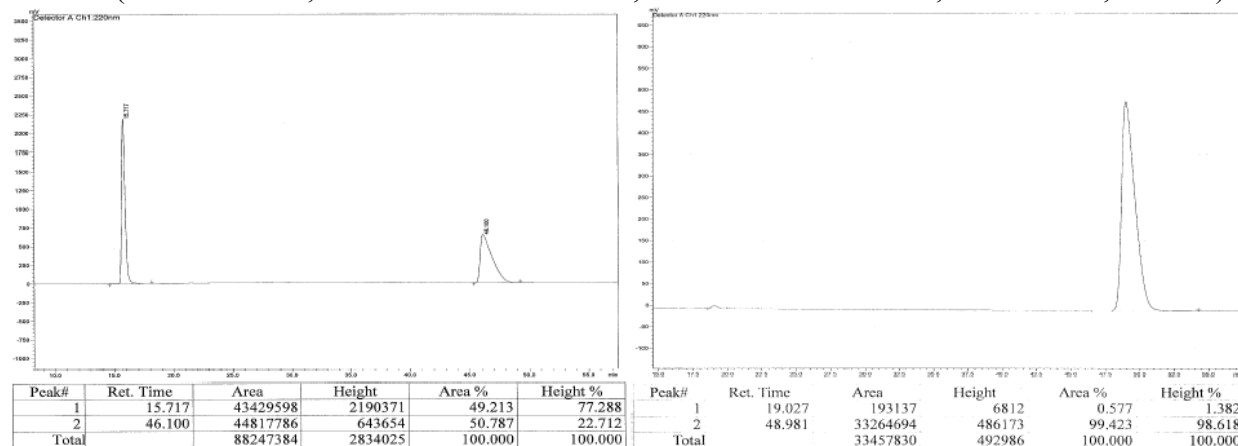

| Peak # | Time (mins) | Area (%) | Peak # | Time (mins) | Area (%) |
|--------|-------------|----------|--------|-------------|----------|
| 1      | 15.72       | 49.2     | 1      | 19.03       | 0.6      |
| 2      | 46.10       | 50.8     | 2      | 48.98       | 99.4     |

***tert*-Butyl-(*S,Z*)-(4-(3-bromophenyl)hexa-2,5-dien-1-yl)carbamate (28, Scheme 6).** The title compound is prepared in the presence of 1.5 equiv of the corresponding alkenylboron reagent (>98% *Z*) and 1.5 equiv of NaOMe following the same representative procedure, except with 5.5 mol % imidazolium salt **9c**. IR (neat): 3062 (w), 3022 (w), 2971 (w), 2917 (w), 1644 (w), 1599 (w), 1491 (w), 1450 (w), 1371 (w), 1073 (w), 1032 (w), 893 (m), 755 (m), 739 (m), 697 (s), 536 (w)  $\text{cm}^{-1}$ ;  $^1\text{H}$  NMR (400 MHz,  $\text{CDCl}_3$ ):  $\delta$  7.36–7.33 (2H, m), 7.19–7.13 (2H, m), 5.93 (1H, ddd,  $J = 17.2, 10.0, 6.4$  Hz), 5.67–5.55 (2H, m), 5.17–5.10 (2H, m), 4.50 (1H, bs), 4.36 (1H, bdd,  $J = 7.6, 7.6$  Hz), 3.83 (2H, dd,  $J = 5.6, 5.6$  Hz), 1.45 (9H, s);  $^{13}\text{C}$  NMR (100 MHz,  $\text{CDCl}_3$ ):  $\delta$  155.9, 145.4, 139.3, 133.1, 130.9, 130.3, 129.8, 127.3, 126.5, 122.9, 116.0, 77.4, 46.8, 37.9, 28.6;

HRMS (ESI+): Calcd for  $C_{13}H_{17}[M+H-Boc]^+$ : 251.03096, Found: 251.03077. Specific Rotation:  $[\alpha]_D^{20} +99.1$  ( $c$  1.21,  $CHCl_3$ ) for an enantiomerically enriched sample of 96:4 er.

Enantiomeric purity is determined by HPLC analysis in comparison with authentic racemic material (96:4 er shown; Chiralcel OD-H column, 99/1 hexanes/*i*-PrOH, 0.5 mL/min, 220 nm).

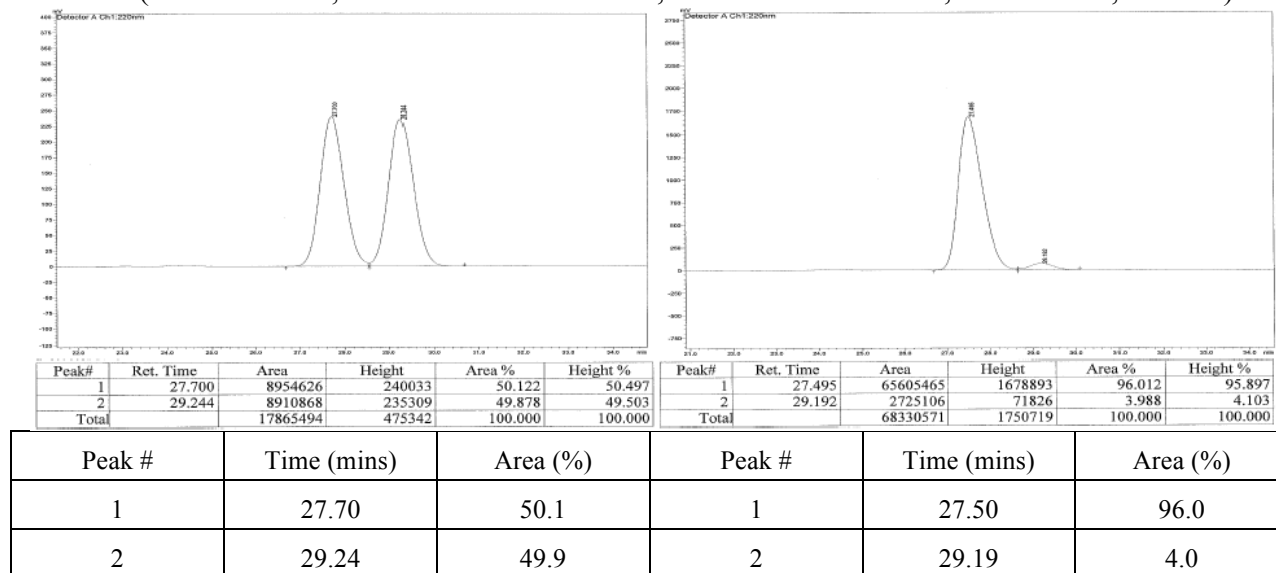

### ■ Experimental Procedure for NHC–Cu-Catalyzed Enantioselective Allylic Substitution (EAS) with Aryl-Substituted *cis*-1,2-Disubstituted Alkenylboron Reagents (Scheme 7 & 8):

In this section, the reactions are performed following the same representative procedure as described for Table 1. The specific differences are included within the characterization data of each compound.

**(*R,Z*)-(3-Cyclohexylpenta-1,4-dien-1-yl)benzene (31, Scheme 7).** The title compound is prepared in the presence of 1.5 equiv of the corresponding alkenylboron reagent (95% *Z*) and 1.5 equiv of NaOMe following the same representative procedure. IR (neat): 3078 (w), 3058 (w), 3023 (w), 2921 (s), 2850 (s), 1633 (m), 1600 (w), 1493 (m), 1447 (s), 1415 (w), 1261 (w), 1074 (w), 1029 (w), 994 (m), 971 (w), 911 (s), 812 (m), 768 (s), 698 (s), 652 (w)  $cm^{-1}$ ;  $^1H$  NMR (400 MHz,  $CDCl_3$ ):  $\delta$  7.32–7.18 (5H, m), 6.52 (1H, d,  $J = 11.6$  Hz), 5.80 (1H, ddd,  $J = 17.6, 10.8, 7.2$  Hz), 5.58 (1H, dd,  $J = 11.6, 10.4$  Hz), 5.07–5.01 (2H, m), 3.11–3.04 (1H, m), 1.74–1.57 (5H, m), 1.33–1.02 (4H, m), 0.95–0.83 (2H, m);  $^{13}C$  NMR (100 MHz,  $CDCl_3$ ):  $\delta$  140.1, 137.9, 133.7, 129.5, 128.8, 128.2, 126.6, 114.9, 48.3, 42.0, 30.8, 30.5, 26.7, 26.6; HRMS (ESI+): Calcd for  $C_{17}H_{23}[M+H]^+$ : 227.17998, Found: 227.18093. Specific Rotation:  $[\alpha]_D^{20} -171$  ( $c$  1.58,  $CHCl_3$ ) for an enantiomerically enriched sample of 91:9 er.

Enantiomeric purity is determined by HPLC analysis in comparison with authentic racemic material (91:9 er shown; Chiralcel OD-H column, 100/0 hexanes/*i*-PrOH, 0.5 mL/min, 220 nm).

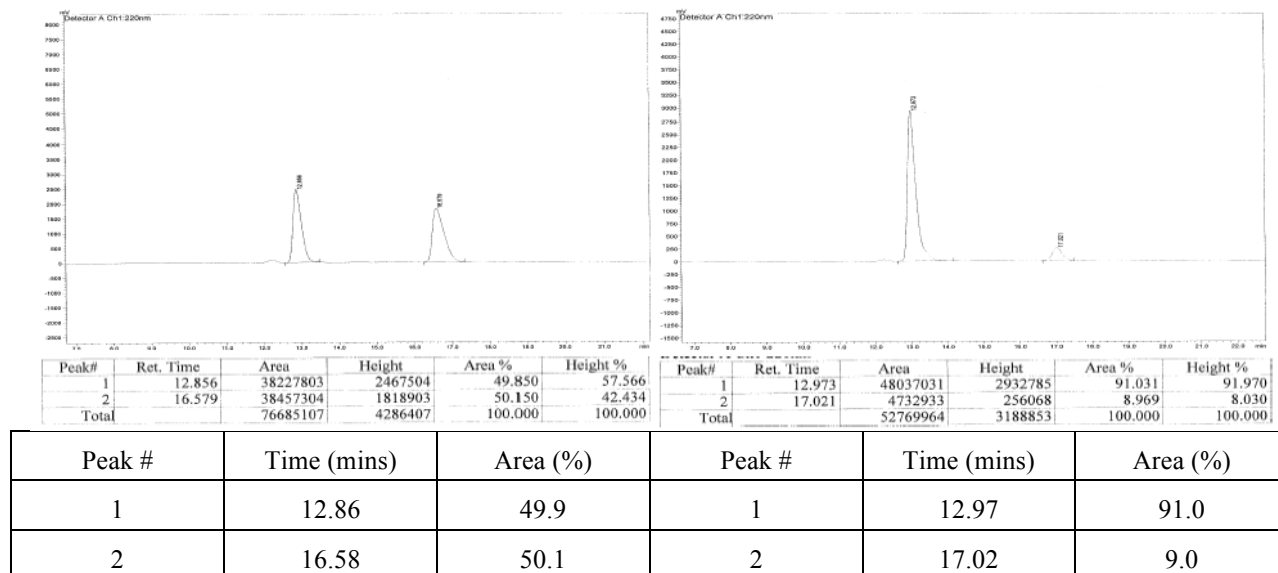

**(*S,Z*)-4-(1-(4-Methoxyphenyl)penta-1,4-dien-3-yl)phenyl 4-methylbenzenesulfonate (33, Scheme 8).** The title compound is prepared in the presence of 1.5 equiv of the corresponding alkenylboron reagent (93% *Z*) and 1.5 equiv of NaOMe based on the same representative procedure. IR (neat): 3008 (w), 2956 (w), 2927 (w), 2837 (w), 1607 (m), 1509 (s), 1490 (s), 1372 (s), 1303 (w), 1248 (s), 1198 (s), 1176 (s), 1153 (s), 1093 (s), 1033 (m), 1018 (m), 922 (w), 864 (s), 839 (s), 815 (m), 750 (m), 669 (m), 570 (s), 552 (s)  $\text{cm}^{-1}$ ;  $^1\text{H}$  NMR (400 MHz,  $\text{CDCl}_3$ ):  $\delta$  7.73–7.70 (2H, m), 7.30 (2H, dd,  $J = 8.8, 0.8$  Hz), 7.21–7.13 (4H, m), 6.93–6.85 (4H, m), 6.56 (1H, d,  $J = 11.6$  Hz), 5.99 (1H, ddd,  $J = 16.8, 10.4, 6.0$  Hz), 5.63 (1H, dd,  $J = 11.2, 10.0$  Hz), 5.20–5.15 (2H, m), 4.54 (1H, dd,  $J = 9.6, 6.0$  Hz), 3.81 (3H, s), 2.45 (3H, s);  $^{13}\text{C}$  NMR (100 MHz,  $\text{CDCl}_3$ ):  $\delta$  158.8, 148.2, 145.4, 142.5, 140.0, 132.7, 130.9, 129.90, 129.86, 129.5, 129.0, 128.6, 122.5, 115.9, 113.9, 55.4, 47.1, 21.9; HRMS (ESI+): Calcd for  $\text{C}_{25}\text{H}_{25}\text{O}_4\text{S}_1$   $[\text{M}+\text{H}]^+$ : 421.14735, Found: 421.14770. Specific Rotation:  $[\alpha]_{\text{D}}^{20} +60.7$  ( $c$  1.81,  $\text{CHCl}_3$ ) for an enantiomerically enriched sample of 97:3 er.

Enantiomeric purity is determined by HPLC analysis in comparison with authentic racemic material (96:4 er shown; Chiralcel OD-H column, 99.5/0.5 hexanes/*i*-PrOH, 0.5 mL/min, 254 nm).

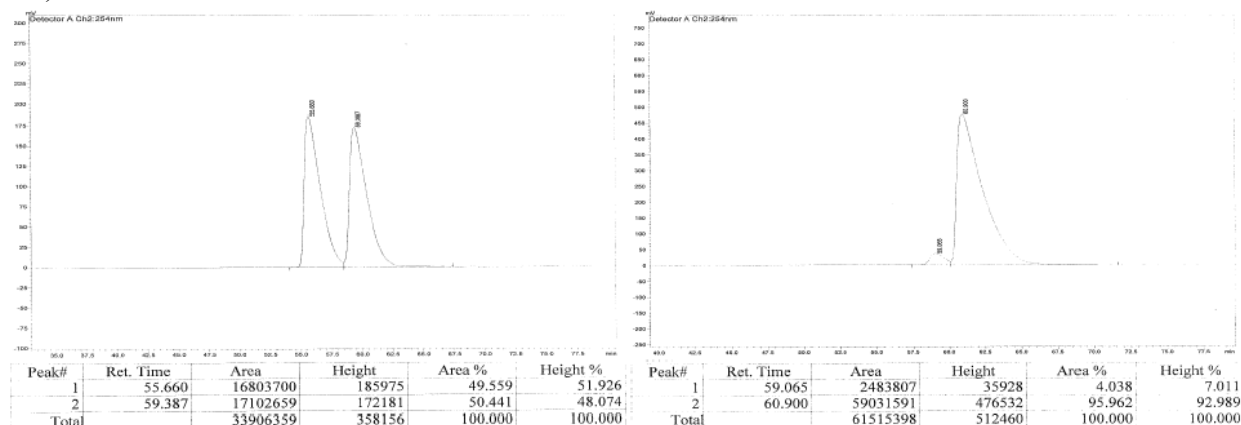

| Peak # | Time (mins) | Area (%) | Peak # | Time (mins) | Area (%) |
|--------|-------------|----------|--------|-------------|----------|
| 1      | 55.66       | 49.6     | 1      | 59.07       | 4.0      |
| 2      | 59.39       | 50.4     | 2      | 60.90       | 96.0     |

**(-)-Nyasol (Scheme 8):** To a 10-mL round-bottom flask with a magnetic stir bar is charged with **33** (40.2 mg, 0.0956 mmol); the flask is equipped with a reflux condenser and the whole apparatus is sealed with a septum and purged with N<sub>2</sub> for five minutes. EtOH (2.0 mL) is added through a syringe followed by the addition of 2.0 N aqueous solution of KOH (112 mg in 1.0 mL H<sub>2</sub>O). The resulting solution is allowed to warm to 80 °C and stir for one hour, after which it is allowed to cool to 22 °C and quenched by addition of an aqueous solution of 1.0 N HCl (2.0 mL). The solution was washed with EtOAc (3 x 1.0 mL); the combined organic layers are dried over anhydrous MgSO<sub>4</sub>, filtered, and concentrated under reduced pressure to afford a yellow oil residue, which is dried under high vacuum. The unpurified mixture is placed in a flame-dried 6-dram vial with a magnetic stir bar and the vessel is sealed with a septum and purged with N<sub>2</sub> flow for 10 minutes. Freshly prepared MeMgI in diethyl ether (956 μL, 0.478 mmol) is added to the reaction vessel through a syringe and solvent is carefully removed under reduced pressure. The resulting mixture is allowed to warm to 180 °C in an oil bath and kept for 10 minutes (white smoke generated as the reaction proceeds, disappearing in 10 minutes), after which it is allowed to cool to 22 °C and diluted with EtOAc (5.0 mL). A saturated solution of NH<sub>4</sub>Cl (2.0 mL) is added to quench the reaction and the layers are separated. The aqueous layer is washed with EtOAc (3 x 2.0 mL) and the combined organic layers are dried over anhydrous MgSO<sub>4</sub>, filtered and concentrated *in vacuo* to afford a brown oil residue, which is subjected to silica gel chromatography (4:1 hexanes/EtOAc) to furnish (-)-nyasol. (19.1 mg, 0.0755 mmol, 79% yield). The product has been previously reported and spectral data match those previously described.<sup>13</sup> IR (neat): 3300 (br), 2975 (w), 2961 (w), 2928 (w), 1634 (m), 1509 (s), 1440 (w), 1366 (w), 1224 (s), 1168 (s), 1099 (m), 913 (m), 829 (s), 732 (m), 649 (w), 623 (w), 542 (w) cm<sup>-1</sup>; <sup>1</sup>H NMR (400 MHz, CDCl<sub>3</sub>): δ 7.17 (2H, dt, *J* = 8.4, 2.4 Hz), 7.10 (2H, dt, *J* = 8.8, 2.4 Hz), 6.79 (2H, dt, *J* = 8.8, 2.4 Hz), 6.78 (2H, dt, *J* = 8.4, 2.4 Hz), 6.52 (1H, d, *J* = 11.6 Hz), 6.00 (1H, ddd, *J* = 16.8, 10.4, 6.0 Hz), 5.68 (1H, dd, *J* = 11.6, 10.0 Hz), 5.16–5.14 (2H, m), 4.75 (1H, s), 4.66 (1H, s), 4.49 (1H, dd, *J* = 10.0, 6.0 Hz); <sup>13</sup>C NMR (100 MHz, CDCl<sub>3</sub>): δ 154.5, 153.9, 140.6, 135.5, 131.8, 130.0, 129.9, 128.7, 128.4, 115.4, 115.2, 115.0, 46.7; HRMS (ESI+): Calcd for C<sub>17</sub>H<sub>17</sub>O<sub>2</sub> [M+H]<sup>+</sup>: 253.12285. Found: 253.12318. Specific rotation: [α]<sub>D</sub><sup>20</sup> +195 (*c* 0.947, CHCl<sub>3</sub>) for an enantiomerically enriched sample of 97:3 er. Assuming the enantiomeric purity is kept the same as compound **33** (see above).

**Determination of stereochemical identity:** Literature value ([α]<sub>D</sub><sup>20</sup> -201.9 (*c* 0.42, CHCl<sub>3</sub>), 98.5:1.5 er) is assigned to the (*R*) enantiomer.<sup>1d</sup>

■ **Formal Synthesis of Heliespirone A and Heliannuol E (Scheme 9):** In this section, the synthesis of compound **35** is performed at 22 °C for 36 h following the representative procedure described in Table 1. Silyl ether **35** is formed as an inconsequential 4:1 diastereomer mixture in 79% yield. The mixture is subsequently deprotected; the resulting secondary alcohol is oxidized

to deliver the *Z* enone and the compound is characterized at this stage (for procedure details, see below).

To a 2-dram vial equipped with a magnetic stir bar is charged with **35** (29.8 mg, 0.0791 mmol). The vessel is evacuated and refilled with N<sub>2</sub> three times; under N<sub>2</sub> atmosphere, tetrahydrofuran (thf, 1.0 mL) is added through a syringe. The solution is allowed to cool to 0 °C in an ice bath followed by dropwise addition of tetrabutylammonium fluoride solution (158 μL, 0.158 mmol, 1.0 M in thf). The resulting light yellow solution is allowed to warm to 22 °C and stir for an additional 12 h before it is quenched by addition of a saturated NH<sub>4</sub>Cl solution (1.0 mL). The layers are separated and the aqueous layer is washed with EtOAc (3 x 1.0 mL). The combined organic layers are dried over anhydrous MgSO<sub>4</sub>, filtered and volatiles removed under reduced pressure to afford yellow oil, which is directly placed into a 2-dram vial equipped with a magnetic stir bar and solid sodium bicarbonate (53.2 mg, 0.633 mmol) is added to the vessel. The vessel is evacuated and refilled with N<sub>2</sub> three times; under N<sub>2</sub> atmosphere, CH<sub>2</sub>Cl<sub>2</sub> (1.0 mL) is added through a syringe. The solution is allowed to cool to 0 °C followed by addition of Dess-Martin periodinane (50.5 mg, 0.119 mmol) in one portion as a solid. The resulting white suspension is allowed to warm to 22 °C and stir for an additional 60 minutes before it is quenched by passing the suspension through a celite plug eluted with EtOAc. The volatiles are removed under reduced pressure to afford a colorless oil residue, which is purified by silica gel column chromatography (8:1 hexanes/EtOAc) to deliver the *Z* enone **S3** as colorless oil (13.4 mg, 0.0514 mmol, 65% yield). **(*S,Z*)-5-(2,5-Dimethoxy-4-methylphenyl)hepta-3,6-dien-2-one (S3, Scheme 9)**. IR (neat) 2932 (m) 2850 (w) 1694 (m) 1611 (w) 1504 (m) 1465 (m) 1397 (m), 1209 (s), 1176 (m), 1045 (s), 916 (w), 866 (w) 789 (w) cm<sup>-1</sup>; <sup>1</sup>H NMR (500 MHz, CDCl<sub>3</sub>): δ 6.74 (1H, s), 6.69 (1H, s), 6.27 (1H, dd, *J* = 11.5, 10.0 Hz), 6.14 (1H, d, *J* = 11.5 Hz), 6.09 (1H, ddd, *J* = 17.0, 10.0, 6.0 Hz), 5.52–5.49 (1H, m), 5.14–5.09 (2H, m), 3.79 (3H, s), 3.75 (3H, s), 2.25 (3H, s), 2.19 (3H, s); <sup>13</sup>C NMR (100 MHz, CDCl<sub>3</sub>): δ 199.2, 152.0, 151.1, 146.5, 139.2, 128.5, 126.7, 126.0, 115.3, 114.9, 111.8, 56.4, 56.2, 43.3, 31.7, 29.8; HRMS (ESI+): Calcd for C<sub>16</sub>H<sub>21</sub>O<sub>3</sub> [M+H]<sup>+</sup>: 261.14907, Found: 261.14862. Specific Rotation: [α]<sub>D</sub><sup>20</sup> +119.7 (*c* 0.670, CHCl<sub>3</sub>) for an enantiomerically enriched sample of 98:2 er.

Enantiomeric purity is determined by HPLC analysis in comparison with authentic racemic material (98:2 er shown; Chiralcel OD-H column, 99.5/0.5 hexanes/*i*-PrOH, 0.5 mL/min, 220 nm).



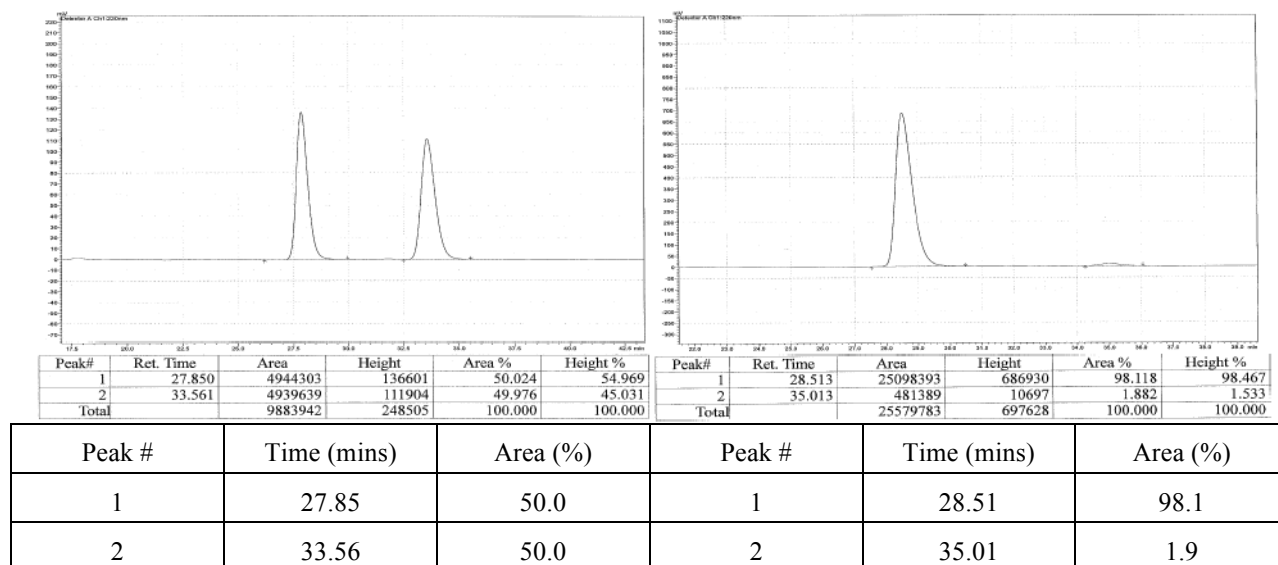

To an oven-dried 2-dram vial equipped with a magnetic stir bar is charged with enone **S3** (52.2 mg, 0.201 mmol). The vessel is evacuated and refilled with N<sub>2</sub> three times; under N<sub>2</sub> atmosphere, Et<sub>2</sub>O (1.5 mL) is added through a syringe. The solution is allowed to cool to -78 °C in a dry ice/acetone bath followed by dropwise addition of MeLi solution (251 μL, 0.402 mmol, 1.6 M in Et<sub>2</sub>O) over 5 minutes. The resulting solution is allowed to stir at -78 °C for additional two hours; then it is allowed to warm to 22 °C after which the reaction is quenched by the addition of a saturated solution of NH<sub>4</sub>Cl (1.0 mL). The layers are separated and the aqueous layer is washed with Et<sub>2</sub>O (3 x 1.0 mL). The combined organic layers are dried over anhydrous MgSO<sub>4</sub>, filtered and volatiles removed under reduced pressure to afford yellow oil, which is purified by silica gel column chromatography (6:1 hexanes/EtOAc) to deliver **36** as colorless oil (51.1 mg, 0.185 mmol, 92% yield). (**S,Z**)-5-(2,5-Dimethoxy-4-methylphenyl)-2-methylhepta-3,6-dien-2-ol (**36**, **Scheme 9**). IR (neat): 3500 (w), 2972 (w), 2830 (w), 1768 (w), 1504 (m), 1466 (m), 1397 (m), 1208 (s), 1045 (m), 1001 (w), 957 (w), 916 (w), 863 (w), 778 (w) cm<sup>-1</sup>; <sup>1</sup>H NMR (400 MHz, CDCl<sub>3</sub>): δ 6.71 (1H, s), 6.67 (1H, s), 6.06 (1H, ddd, *J* = 17.2, 10.4, 4.4 Hz), 5.57 (1H, d, *J* = 11.2 Hz), 5.38–5.27 (2H, m), 5.23–5.17 (2H, m), 3.82 (3H, s), 3.78 (3H, s), 3.15 (1H, bs), 2.20 (3H, s), 1.39 (3H, s), 1.35 (3H, s); <sup>13</sup>C NMR (100 MHz, CDCl<sub>3</sub>): δ 152.3, 150.0, 140.6, 137.0, 130.3, 129.7, 125.6, 115.2, 114.4, 110.9, 71.7, 56.3, 56.2, 39.9, 32.0, 30.8, 16.3; HRMS (ESI+): Calcd for C<sub>17</sub>H<sub>23</sub>O<sub>2</sub> [M+H-H<sub>2</sub>O]<sup>+</sup>: 259.16980, Found: 259.16932. Specific Rotation: [α]<sub>D</sub><sup>20</sup> +183.9 (*c* 0.560, CHCl<sub>3</sub>) for an enantiomerically enriched sample of 98:2 er. Assuming the enantiomeric purity is kept the same as the *Z* enone **S3** (see above).

To an oven-dried 2-dram vial equipped with a magnetic stir bar is charged with tertiary alcohol **36** (51.1 mg, 0.185 mmol). The vessel is evacuated and refilled with N<sub>2</sub> three times; under N<sub>2</sub> atmosphere, CH<sub>2</sub>Cl<sub>2</sub> (2.0 mL) is added through a syringe. The solution is allowed to cool to -20 °C in a cryogenic bath followed by dropwise addition of titanium (IV) isopropoxide (110 μL, 0.370 mmol). The resulting solution is allowed to stir for an additional 10 minutes, after which time *tert*-butyl peroxide (~5.5 M in decane, 101 μL, 0.555 mmol) is added through a syringe.

The solution is allowed to stir for an additional 18 h before the reaction is quenched by addition of 0.1 M aqueous solution of HCl (2.0 mL). The mixture is allowed to warm to ambient temperature and stir for another 30 minutes. Layers are separated and the aqueous layer is washed with Et<sub>2</sub>O (3 x 1.0 mL). The combined organic layers are dried over anhydrous MgSO<sub>4</sub>, filtered and volatiles removed under reduced pressure to afford colorless oil, which is purified by silica gel column chromatography (4:1 hexanes/EtOAc) to deliver **37** as colorless oil (41.1 mg, 0.141 mmol, 76% yield). **2-((2*S*,3*S*)-3-((*R*)-1-(2,5-Dimethoxy-4-methylphenyl)allyl)oxiran-2-yl)propan-2-ol (**37**, Scheme 9).** In the unpurified mixture, ~15% mono epoxidation at the terminal alkene is also observed. The major epoxidation product is obtained as a 92:8 diastereomer mixture; the minor diastereomer can be separated from the desired **37**. IR (neat): 3489 (w), 3455 (w), 2972 (m), 2831 (w), 1505 (m), 1466 (m), 1397 (m), 1210 (s), 1044 (s), 998 (w), 968 (w), 922 (w), 866 (w) cm<sup>-1</sup>; <sup>1</sup>H NMR (400 MHz, CDCl<sub>3</sub>): δ 6.74 (1H, s), 6.69 (1H, s), 6.16 (1H, ddd, *J* = 17.2, 10.4, 6.4 Hz), 5.21 (1H, ddd, *J* = 17.6, 1.6, 1.6 Hz), 5.16 (1H, ddd, *J* = 10.4, 1.6, 1.2 Hz), 4.29–4.24 (1H, m), 3.78 (6H, s), 3.41 (1H, dd, *J* = 9.6, 4.0 Hz), 2.82 (1H, d, *J* = 4.4 Hz), 2.21 (3H, s), 1.36 (3H, s), 1.10 (3H, s); <sup>13</sup>C NMR (100 MHz, CDCl<sub>3</sub>): δ 152.3, 150.2, 139.1, 126.8, 126.3, 115.7, 115.2, 112.1, 68.5, 63.9, 61.1, 56.6, 56.2, 41.2, 29.7, 25.9, 16.4; HRMS (ESI+): Calcd for C<sub>17</sub>H<sub>25</sub>O<sub>4</sub> [M+H]<sup>+</sup>: 293.17528, Found: 293.17594. Specific Rotation: [α]<sub>D</sub><sup>20</sup> +25.8 (*c* 0.387, CHCl<sub>3</sub>) for an enantiomerically enriched sample of 98:2 er.

To an oven-dried 2-dram vial equipped with a magnetic stir bar is charged with epoxy alcohol **37** (41.1 mg, 0.141 mmol). The vessel is evacuated and refilled with N<sub>2</sub> three times; under N<sub>2</sub> atmosphere, tetrahydrofuran (thf, 1.0 mL) is added through a syringe. The vessel is charged with titanium (IV) isopropoxide (83 μL, 0.282 mmol) in a dropwise fashion and the resulting solution is allowed to stand at 22 °C for 10 minutes before LiBH<sub>4</sub> solution (282 μL, 0.564 mmol, 2 M in thf) is introduced through a syringe. The resulting mixture is allowed to warm to 50 °C and stir for an additional 18 h, after which time it is allowed to cool to 22 °C and the reaction is quenched by addition of a 0.1 M solution of aqueous HCl (1.0 mL). The mixture is allowed to stir for another 30 minutes. Layers are separated and the aqueous layer is washed with EtOAc (3 x 1.0 mL). The combined organic layers are dried over anhydrous MgSO<sub>4</sub>, filtered and volatiles removed under reduced pressure to afford yellow oil, which is purified by silica gel chromatography (1:1 hexanes/EtOAc) to deliver **38** as colorless oil (22.8 mg, 0.0776 mmol, 55% yield). **(3*S*,5*R*)-5-(2,5-Dimethoxy-4-methylphenyl)-2-methylhept-6-ene-2,3-diol (**38**, Scheme 9).** The compound has been previously prepared and the spectral data match those reported.<sup>14</sup> <sup>1</sup>H NMR (400 MHz, CDCl<sub>3</sub>): δ 6.70 (1H, s), 6.66 (1H, s), 6.03 (1H, ddd, *J* = 18.0, 10.4, 9.6 Hz), 5.17–5.10 (2H, m), 3.90 (1H, dt, *J* = 9.6, 4.8 Hz), 3.80 (3H, s), 3.78 (3H, s), 3.52 (1H, dd, *J* = 9.2, 4.0 Hz), 2.19 (3H, s), 2.08 (1H, d, *J* = 4.4 Hz), 2.06 (1H, bs), 1.94 (1H, dd, *J* = 14.0, 10.0 Hz), 1.64–1.58 (1H, m), 1.21 (3H, s), 1.15 (3H, s); <sup>13</sup>C NMR (100 MHz, CDCl<sub>3</sub>): δ 152.0, 150.4, 140.4, 131.3, 125.2, 115.5, 114.8, 110.9, 76.4, 73.1, 56.5, 56.2, 40.6, 37.2, 26.3, 23.7, 16.3; HRMS (ESI+): Calcd for C<sub>17</sub>H<sub>26</sub>O<sub>4</sub> [M]<sup>+</sup>: 294.18311, Found: 294.18332. Specific Rotation: [α]<sub>D</sub><sup>20</sup> –33.3 (*c* 0.330, CHCl<sub>3</sub>) for an enantiomerically enriched sample of 98:2 er.

**Determination of stereochemical identity:** Literature value ( $[\alpha]_D^{20} +36.3$  (c 0.25,  $\text{CHCl}_3$ ), 98:2 er) is assigned to the (3*R*, 5*S*) enantiomer.<sup>14</sup>

■ **Synthesis of Santolina Alcohol (eq 1):** In this section, the synthesis of santolina alcohol is performed with 2.5 equiv of the corresponding alkenylboron reagent at 4 °C for 24 h following the same representative procedure as described for Table 1. The product is volatile and therefore the loss of santolina alcohol occurs during the work-up and isolation processes.

**(*S*)-2,5-Dimethyl-3-vinylhex-4-en-2-ol (santolina alcohol).** The compound is commercially available and the spectral data match those collected from a sample obtained through a purchase. <sup>1</sup>H NMR (400 MHz,  $\text{CDCl}_3$ ):  $\delta$  5.84–5.75 (1H, m), 5.16 (1H, dddd,  $J = 10.0, 2.4, 1.6, 0.8$  Hz), 5.11–5.06 (2H, m), 2.98 (1H, dd,  $J = 9.2, 8.8$  Hz), 1.76 (3H, d,  $J = 1.6$  Hz), 1.69 (1H, bs), 1.66 (3H, d,  $J = 1.2$  Hz), 1.18 (3H, s); <sup>13</sup>C NMR (100 MHz,  $\text{CDCl}_3$ ):  $\delta$  138.1, 135.0, 122.8, 116.6, 72.7, 54.7, 27.1, 26.8, 26.4, 18.4; HRMS (ESI+): Calcd for  $\text{C}_{10}\text{H}_{17}[\text{M}+\text{H}-\text{H}_2\text{O}]^+$ : 137.13303, Found: 137.13342. Specific Rotation:  $[\alpha]_D^{20} +3.24$  (c 0.440,  $\text{CHCl}_3$ ) for an enantiomerically enriched sample of 96:4 er.

**Determination of stereochemical identity:** Specific rotation value ( $[\alpha]_D^{20} +15.0$  (neat), >98:2 er) from Aldrich Chemical Co. is assigned to the (*S*) enantiomer.

Enantiomeric purity is determined by HPLC analysis in comparison with authentic racemic material (96:4 er shown; Chiralcel OD-H column, 99/1 hexanes/*i*-PrOH, 0.8 mL/min, 220 nm).

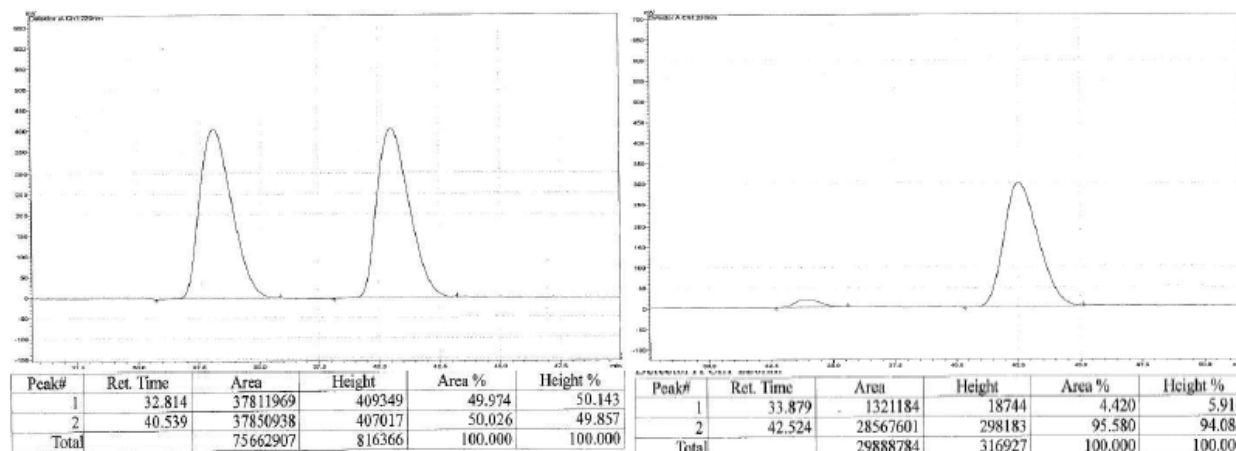

| Peak # | Time (mins) | Area (%) | Peak # | Time (mins) | Area (%) |
|--------|-------------|----------|--------|-------------|----------|
| 1      | 32.81       | 50.0     | 1      | 33.88       | 4.4      |
| 2      | 40.54       | 50.0     | 2      | 42.52       | 95.6     |

■ **Experimental Procedure for NHC–Cu-Catalyzed Enantioselective Allylic Substitution (EAS) with Heterocycle-Substituted Alkenylboron Reagents (Scheme 10):** In this section, the reactions are performed following the same representative procedure as described for Table 1. The specific differences are included within the characterization data of each compound.

**tert-Butyl (S)-4-(1-(2-bromophenyl)allyl)-3,6-dihydropyridine-1(2H)-carboxylate (42a, Scheme 10).** IR (neat): 2976 (w), 2827 (w), 2837 (w), 1696 (s), 1467 (w), 1415 (m), 1365 (m), 1286 (w), 1240 (m), 1171 (s), 1112 (m), 1022 (w), 921 (w), 754 (m)  $\text{cm}^{-1}$ ;  $^1\text{H}$  NMR (400 MHz,  $\text{CDCl}_3$ ):  $\delta$  7.54 (1H, dd,  $J = 8.0, 1.2$  Hz), 7.25 (1H, ddd,  $J = 7.6, 7.6, 1.6$  Hz), 7.16 (1H, dd,  $J = 8.0, 2.0$  Hz), 7.09–7.05 (1H, m), 5.96 (1H, ddd,  $J = 17.2, 10.4, 6.8$  Hz), 5.37 (1H, br s), 5.18 (1H, ddd,  $J = 10.4, 1.6, 1.2$  Hz), 4.95 (1H, ddd,  $J = 17.2, 1.6, 1.2$  Hz), 4.40 (1H, d,  $J = 6.8$  Hz), 3.90 (2H, br s), 3.48–3.36 (2H, m), 1.98 (2H, br s), 1.44 (9H, br s);  $^{13}\text{C}$  NMR (100 MHz,  $\text{CDCl}_3$ ):  $\delta$  155.1, 140.6, 137.9, 137.2 (br), 133.2, 129.7, 128.2, 127.5, 125.7, 121.0 (br), 117.1, 79.7, 54.5, 43.6 (br), 41.2 (br), 40.0 (br), 28.6; HRMS (ESI+): Calcd for  $\text{C}_{14}\text{H}_{17}\text{BrN}_1$  [ $\text{M}+2\text{H}-\text{Boc}$ ] $^+$ : 278.05444, Found: 278.05322. Specific Rotation:  $[\alpha]_{\text{D}}^{20} -30.1$  ( $c$  1.99,  $\text{CHCl}_3$ ) for an enantiomerically enriched sample of 93:7 er.

Enantiomeric purity is determined by HPLC analysis in comparison with authentic racemic material (95:5 er shown; Chiralcel OD-H column, 99/1 hexanes/*i*-PrOH, 0.5 mL/min, 220 nm).

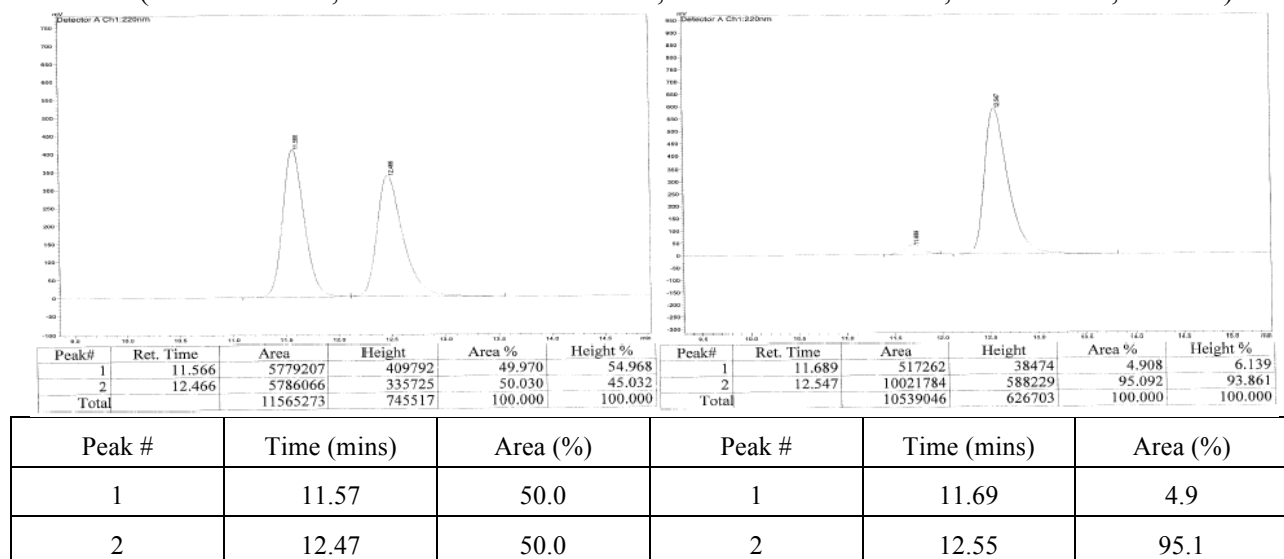

**tert-Butyl (S)-4-(2-methyl-1-phenylallyl)-3,6-dihydropyridine-1(2H)-carboxylate (43a, Scheme 10).** The title compound is prepared at 60 °C for 24 h following the same representative procedure. IR (neat): 2975 (m), 2928 (m), 2853 (w), 1699 (s), 1417 (m), 1365 (w), 1338 (w), 1285 (w), 1241 (m), 1173 (s), 1110 (m), 959 (w), 897 (w), 865 (w), 770 (w), 701 (w), 656 (w), 539 (w)  $\text{cm}^{-1}$ ;  $^1\text{H}$  NMR (500 MHz,  $\text{CDCl}_3$ ):  $\delta$  7.31–7.27 (2H, m), 7.24–7.20 (1H, m), 7.17–7.14 (2H, m), 5.24 (1H, br s), 5.00 (1H, dd,  $J = 1.5, 1.0$  Hz), 4.62 (1H, s), 3.89–3.86 (3H, m), 3.48 (2H, t,  $J = 6.0$ ), 2.12 (2H, br s), 1.73 (3H, s), 1.46 (9H, s);  $^{13}\text{C}$  NMR (125 MHz,  $\text{CDCl}_3$ ):  $\delta$  155.1, 145.7, 140.8, 129.2, 128.3, 126.6, 125.4, 121.2, 113.7, 79.6, 59.7, 43.5, 29.9, 28.6, 25.3, 23.3; HRMS (ESI+): Calcd for  $\text{C}_{16}\text{H}_{18}\text{N}_1\text{O}_2$  [ $\text{M}-\text{C}_4\text{H}_9$ ] $^+$ : 256.1338, Found: 256.1327. Specific Rotation:  $[\alpha]_{\text{D}}^{20} +8.90$  ( $c$  1.91,  $\text{CHCl}_3$ ) for an enantiomerically enriched sample of 92:8 er.

Enantiomeric purity is determined by HPLC analysis in comparison with authentic racemic material (92:8 er shown; Chiralpak AD-H column, 99.7/0.3 hexanes/*i*-PrOH, 0.5 mL/min, 220 nm).

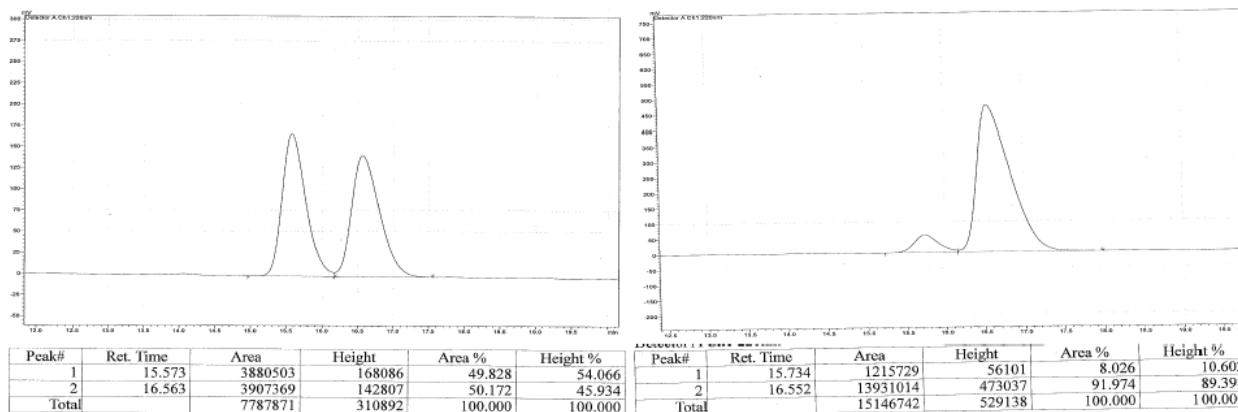

| Peak # | Time (mins) | Area (%) | Peak # | Time (mins) | Area (%) |
|--------|-------------|----------|--------|-------------|----------|
| 1      | 15.57       | 49.8     | 1      | 15.73       | 8.0      |
| 2      | 16.56       | 50.2     | 2      | 16.55       | 92.0     |

**tert-Butyl (S)-4-(2-methyl-5-phenylpent-1-en-3-yl)-3,6-dihydropyridine-1(2H)-carboxylate (43b, Scheme 10).** The title compound is prepared at 60 °C for 24 h based on the same representative procedure. IR (neat): 2975 (m), 2930 (m), 2859 (w), 1699 (s), 1418 (m), 1365 (w), 1285 (w), 1241 (m), 1173 (s), 1111 (m), 892 (w), 770 (w), 700 (w)  $\text{cm}^{-1}$ ;  $^1\text{H}$  NMR (500 MHz,  $\text{CDCl}_3$ ):  $\delta$  7.30–7.25 (2H, m), 7.20–7.15 (3H, m), 5.45 (1H, br s), 4.87 (1H, dd,  $J = 1.5, 1.0$  Hz), 4.78 (1H, br s), 3.88 (2H, dt,  $J = 6.0, 2.5$  Hz), 3.51–3.44 (2H, m), 3.39 (1H, ddd,  $J = 12.5, 6.5, 4.5$  Hz), 2.61–2.51 (3H, m), 2.13 (1H, ddt,  $J = 7.0, 4.0, 3.5$  Hz), 1.83 (2H, ddt,  $J = 9.0, 7.5, 2.0$  Hz), 1.60 (3H, s), 1.47 (9H, s);  $^{13}\text{C}$  NMR (125 MHz,  $\text{CDCl}_3$ ):  $\delta$  155.1, 145.7, 142.6, 128.6, 128.4, 125.9, 125.3, 119.4, 111.9, 79.6, 53.2, 43.5, 34.0, 31.8, 28.6, 26.3, 25.3, 20.5; HRMS (ESI+): Calcd for  $\text{C}_{18}\text{H}_{22}\text{N}_1\text{O}_2$  [ $\text{M}-\text{C}_4\text{H}_9$ ] $^+$ : 284.1651, Found: 284.1689. Specific Rotation:  $[\alpha]_{\text{D}}^{20} -16.1$  ( $c$  2.68,  $\text{CHCl}_3$ ) for an enantiomerically enriched sample of 91:9 er.

Enantiomeric purity is determined by HPLC analysis in comparison with authentic racemic material (91:9 er shown; Chiralpak AD-H column, 99.7/0.3 hexanes/*i*-PrOH, 0.5 mL/min, 220 nm).

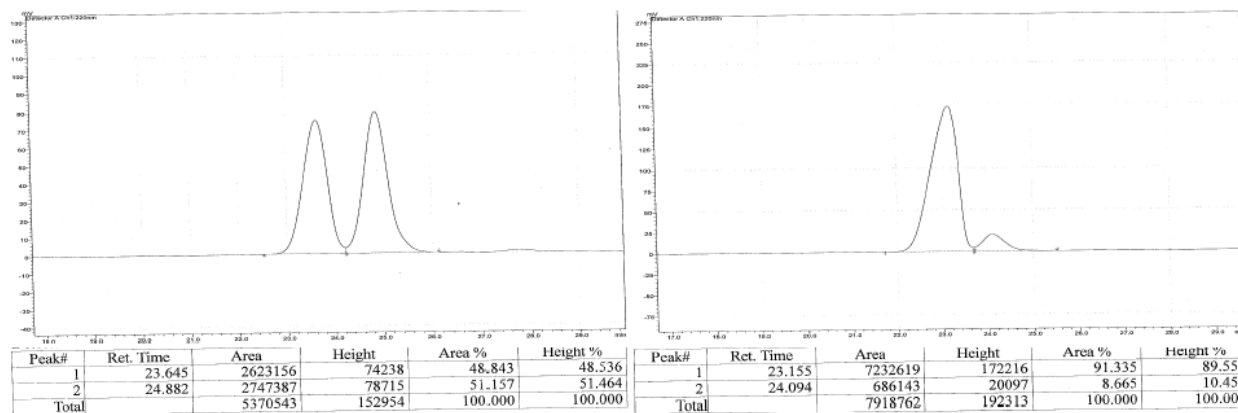

| Peak # | Time (mins) | Area (%) | Peak # | Time (mins) | Area (%) |
|--------|-------------|----------|--------|-------------|----------|
| 1      | 23.65       | 48.8     | 1      | 23.16       | 91.3     |

|   |       |      |   |       |     |
|---|-------|------|---|-------|-----|
| 2 | 24.88 | 51.2 | 2 | 24.09 | 8.7 |
|---|-------|------|---|-------|-----|

**Methyl (S)-2-((4-bromophenyl)(3,6-dihydro-2H-pyran-4-yl)methyl)acrylate (44, Scheme 10).**

The title compound is prepared with 2.5 mol % **9c** and 25 mol % CuCl at 60 °C for 24 h following the same representative procedure. IR (neat): 2956 (w), 2924 (w), 2835 (m), 1720 (s), 1598 (w), 1486 (s), 1464 (m), 1340 (s), 1287 (w), 1243 (s), 1233 (m), 1132 (s), 1128 (m), 1052 (s), 917 (m), 828 (w), 749 (m)  $\text{cm}^{-1}$ ;  $^1\text{H}$  NMR (400 MHz,  $\text{CDCl}_3$ )  $\delta$  7.44 (2H, d,  $J = 8.4$  Hz), 7.05 (2H, d,  $J = 8.4$  Hz), 6.40 (1H, app s), 5.34 (1H, t,  $J = 1.2$  Hz), 5.28 (1H, dt,  $J = 2.8, 1.2$  Hz), 4.54 (1H, br s), 4.15 (2H, dtt,  $J = 11.2, 5.2, 2.8$  Hz), 3.73 (3H, s), 3.86–3.71 (2H, m), 2.18–1.95 (2H, m);  $^{13}\text{C}$  NMR (100 MHz,  $\text{CDCl}_3$ )  $\delta$  167.1, 140.3, 138.9, 136.6, 131.5, 130.7, 126.9, 121.9, 120.8, 65.8, 64.7, 52.3, 49.6, 28.2; HRMS (ESI<sup>+</sup>): Calcd for  $\text{C}_{16}\text{H}_{18}^{79}\text{BrO}_3$   $[\text{M}+\text{H}]^+$ : 337.04393, Found: 337.04357.

Enantiomeric purity is determined by HPLC analysis in comparison with authentic racemic material (95:5 er shown; Chiralcel OD column, 95/5 hexanes/*i*-PrOH, 0.8 mL/min, 220 nm).

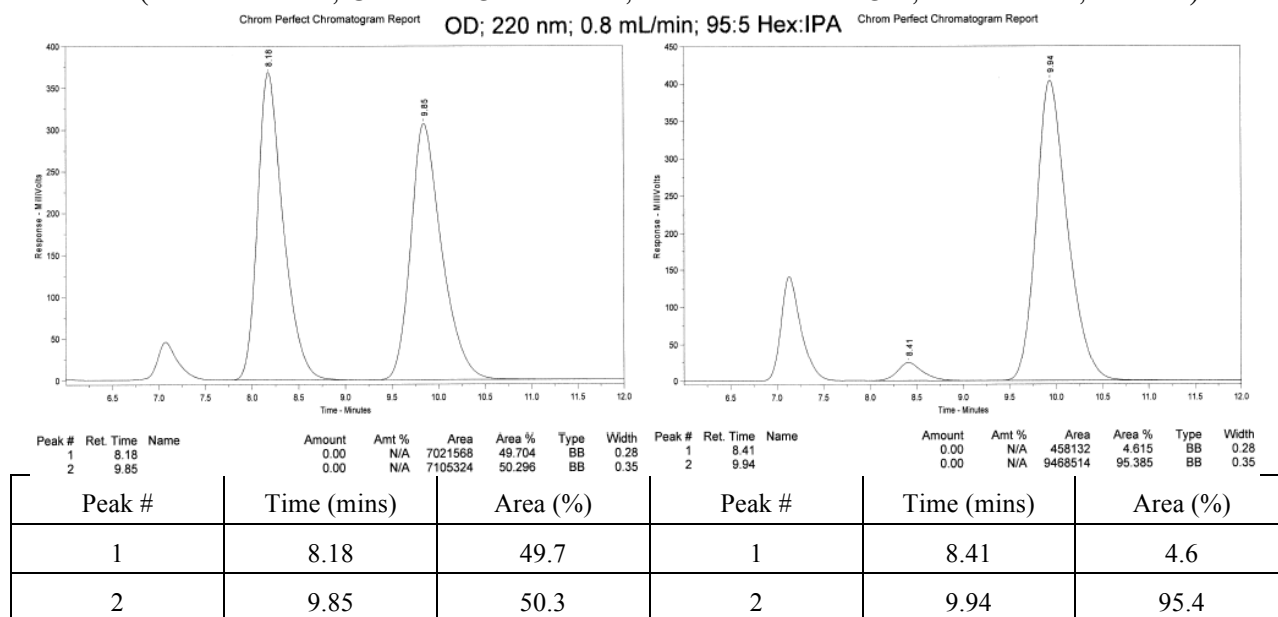

**(S)-4-(1-(2-Methoxyphenyl)allyl)-3,6-dihydro-2H-pyran (45, Scheme 10).** IR (neat): 2956 (w), 2922 (m), 2834 (m), 1634 (w), 1598 (w), 1490 (s), 1463 (m), 1439 (w), 1288 (w), 1243 (s), 1130 (s), 1031 (m), 917 (m), 754 (s)  $\text{cm}^{-1}$ ;  $^1\text{H}$  NMR (400 MHz,  $\text{CDCl}_3$ ):  $\delta$  7.21 (1H, ddd,  $J = 9.2, 7.6, 2.0$  Hz), 7.13 (1H, dd,  $J = 7.6, 2.0$  Hz), 6.92 (1H, ddd,  $J = 7.2, 7.2, 0.8$  Hz), 6.88 (1H, dd,  $J = 8.0, 1.2$  Hz), 6.05 (1H, ddd,  $J = 17.2, 10.0, 7.2$  Hz), 5.46–5.44 (1H, m), 5.12 (1H, ddd,  $J = 11.2, 2.0, 1.2$  Hz), 4.95 (1H, ddd,  $J = 16.8, 1.6, 1.6$  Hz), 4.40 (1H, d,  $J = 6.8$  Hz), 4.19–4.16 (2H, m), 3.81 (3H, s), 3.74 (2H, ddd,  $J = 22.0, 11.2, 5.6$  Hz), 2.02–1.98 (2H, m);  $^{13}\text{C}$  NMR (100 MHz,  $\text{CDCl}_3$ ):  $\delta$  157.4, 139.0, 137.1, 129.9, 128.7, 127.6, 121.7, 120.6, 115.9, 110.9, 65.9, 64.7, 55.8, 48.0, 28.4; HRMS (ESI<sup>+</sup>): Calcd for  $\text{C}_{15}\text{H}_{19}\text{O}_2$   $[\text{M}+\text{H}]^+$ : 231.13850, Found: 231.13929. Specific Rotation:  $[\alpha]_D^{20} -15.2$  ( $c$  1.28,  $\text{CHCl}_3$ ) for an enantiomerically enriched sample of 93:7 er.

Enantiomeric purity is determined by HPLC analysis in comparison with authentic racemic material (93:7 er shown; Chiralcel OJ-H column, 99.5/0.5 hexanes/*i*-PrOH, 0.5 mL/min, 220 nm).

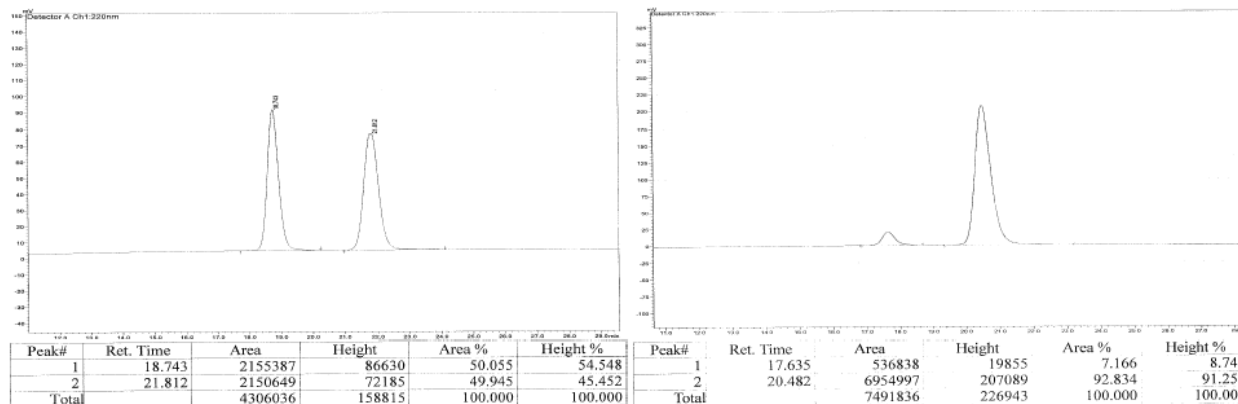

| Peak # | Time (mins) | Area (%) | Peak # | Time (mins) | Area (%) |
|--------|-------------|----------|--------|-------------|----------|
| 1      | 18.74       | 50.1     | 1      | 17.64       | 7.2      |
| 2      | 21.81       | 49.9     | 2      | 20.48       | 92.8     |

**(S)-4-(2-Methyl-5-phenylpent-1-en-3-yl)-3,6-dihydro-2H-pyran (46, Scheme 10).** The title compound is prepared at 60 °C for 24 h following the same representative procedure. IR (neat): 3063 (w), 3025 (w), 2928 (m), 2849 (m), 1643 (w), 1603 (w), 1495 (w), 1453 (m), 1371 (w), 1234 (w), 1126 (s), 1029 (w), 971 (w), 890 (m), 851 (w), 747 (m), 698 (s), 572 (w), 478 (w)  $\text{cm}^{-1}$ ;  $^1\text{H}$  NMR (400 MHz,  $\text{CDCl}_3$ ):  $\delta$  7.31–7.26 (2H, m), 7.20–7.16 (3H, m), 5.53–5.50 (1H, m), 4.89–4.88 (1H, m), 4.80–4.79 (1H, m), 4.18–4.16 (2H, m), 3.80–3.71 (2H, m), 2.60–2.55 (3H, m), 2.08–1.99 (1H, m), 1.95–1.82 (3H, m), 1.63 (3H, dd,  $J = 1.2, 0.4$  Hz);  $^{13}\text{C}$  NMR (100 MHz,  $\text{CDCl}_3$ ):  $\delta$  145.7, 142.7, 136.3, 128.6, 128.5, 125.9, 121.2, 112.0, 65.7, 64.8, 53.2, 34.0, 31.6, 26.5, 20.4; HRMS (ESI+): Calcd for  $\text{C}_{13}\text{H}_{21}\text{O}_1$   $[\text{M}+\text{H}]^+$ : 243.17489, Found: 243.17497. Specific Rotation:  $[\alpha]_D^{20} -11.1$  ( $c$  1.13,  $\text{CHCl}_3$ ) for an enantiomerically enriched sample of 91:9 er.

Enantiomeric purity is determined by HPLC analysis in comparison with authentic racemic material (91:9 er shown; Chiralcel OD-H column, 99/1 hexanes/*i*-PrOH, 0.5 mL/min, 220 nm).

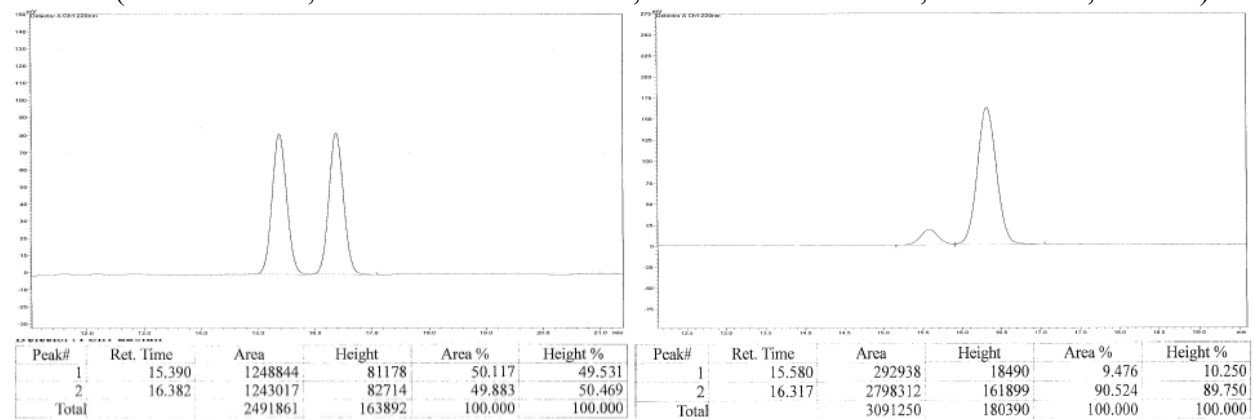

| Peak # | Time (mins) | Area (%) | Peak # | Time (mins) | Area (%) |
|--------|-------------|----------|--------|-------------|----------|
| 1      | 15.39       | 50.1     | 1      | 15.58       | 9.5      |
| 2      | 16.38       | 49.9     | 2      | 16.32       | 90.5     |

**Methyl (S)-2-((4-bromophenyl)(3,4-dihydro-2H-pyran-6-yl)methyl)acrylate (47a, Scheme 10).** The title compound is prepared with 2.5 mol % **9c** and 25 mol % CuCl at 60 °C for 24 h based on the representative procedure. IR (neat): 1720 (s), 1490 (m), 1240 (s), 1230 (m), 1150 (m), 1130 (s), 1080 (m), 1060 (s), 1010 (m), 820 (m) cm<sup>-1</sup>; <sup>1</sup>H NMR (400 MHz, CDCl<sub>3</sub>) δ 7.42 (2H, d, *J* = 8.4 Hz), 7.11 (2H, d, *J* = 8.4 Hz), 6.38 (1H, app s), 5.52 (1H, t, *J* = 1.2 Hz), 4.59 (1H, s), 4.47 (1H, t, *J* = 3.6 Hz), 3.96 (2H, dd, *J* = 5.2, 4.8 Hz), 3.71 (3H, s), 2.04–2.00 (2H, m), 1.79 (2H, dt, *J* = 10.4, 5.6 Hz); <sup>13</sup>C NMR (125 MHz, CDCl<sub>3</sub>) δ 167.3, 152.6, 140.6, 138.9, 131.5, 130.7, 127.2, 120.8, 99.9, 66.6, 52.2, 50.9, 22.3, 20.5; HRMS (ESI<sup>+</sup>): Calcd for C<sub>16</sub>H<sub>18</sub><sup>79</sup>BrO<sub>3</sub> [M+H]<sup>+</sup>: 337.0439, Found: 337.0441.

**Determination of stereochemical identity:** The absolute stereochemistry is secured by X-ray crystallography of the title compound (see the last section).

Enantiomeric purity is determined by HPLC analysis in comparison with authentic racemic material (98:2 er shown; Chiralcel OD-H column, 99.8/0.2 hexanes/*i*-PrOH, 1.0 mL/min, 220 nm).

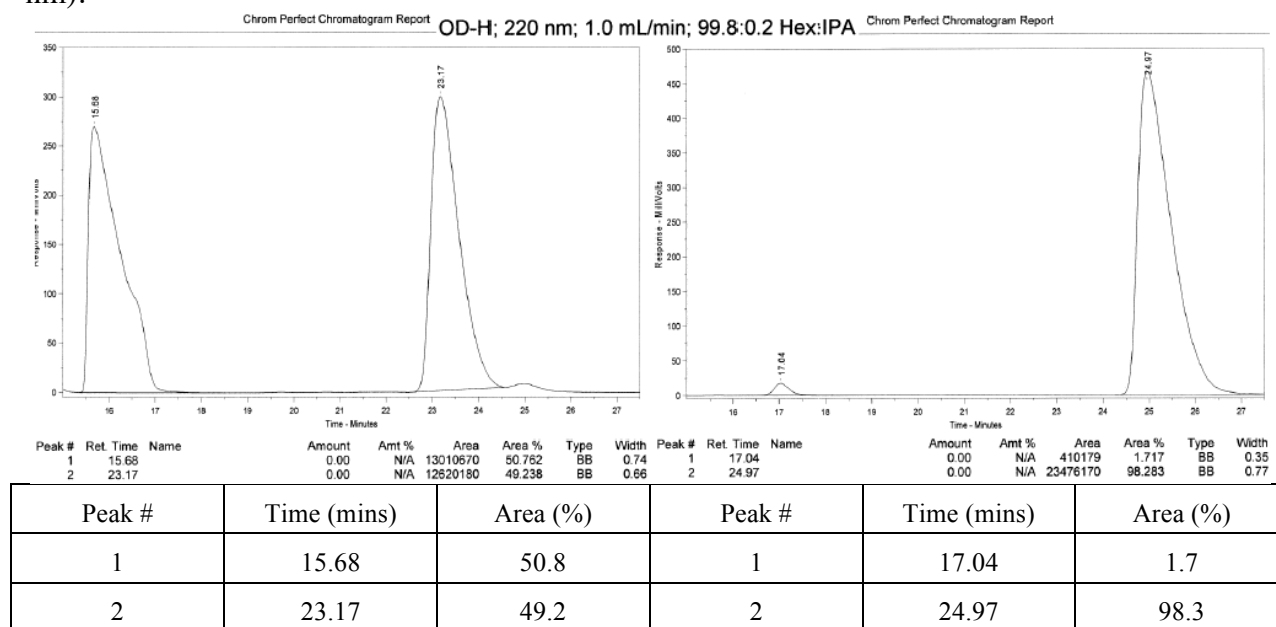

**Methyl (S)-2-((3,4-dihydro-2H-pyran-6-yl)(*o*-tolyl)methyl)acrylate (47b, Scheme 10).** The title compound is prepared with 2.5 mol % **9c** and 25 mol % CuCl at 60 °C for 24 h based on the representative procedure. IR (neat): 1720 (s), 1290 (w), 1250 (m), 1230 (m), 1150 (m), 1130 (s), 1060 (m) cm<sup>-1</sup>; <sup>1</sup>H NMR (400 MHz, CDCl<sub>3</sub>) δ 7.19–7.13 (4H, m), 6.36 (1H, dd, *J* = 1.2, 0.8 Hz), 5.43 (1H, t, *J* = 1.2 Hz), 4.79 (1H, br s), 4.39 (1H, t, *J* = 4.0 Hz), 3.99 (2H, dd, *J* = 6.0, 4.0 Hz), 3.72 (3H, s), 2.30 (3H, s), 2.05–2.00 (2H, m), 1.81 (2H, dt, *J* = 10.4, 6.0 Hz); <sup>13</sup>C NMR (125 MHz, CDCl<sub>3</sub>) δ 167.5, 153.5, 140.6, 137.9, 136.9, 130.6, 127.7, 126.9, 126.8, 125.8, 99.8, 66.6, 52.1, 47.8, 22.4, 20.6, 19.5; HRMS (ESI<sup>+</sup>): Calcd for C<sub>17</sub>H<sub>21</sub>O<sub>3</sub> [M+H]<sup>+</sup>: 273.1491, Found: 273.1487.



Enantiomeric purity is determined by HPLC analysis in comparison with authentic racemic material (96:4 er shown; Chiralcel OC-H column, 99.8/0.2 hexanes/*i*-PrOH, 1.0 mL/min, 220 nm).

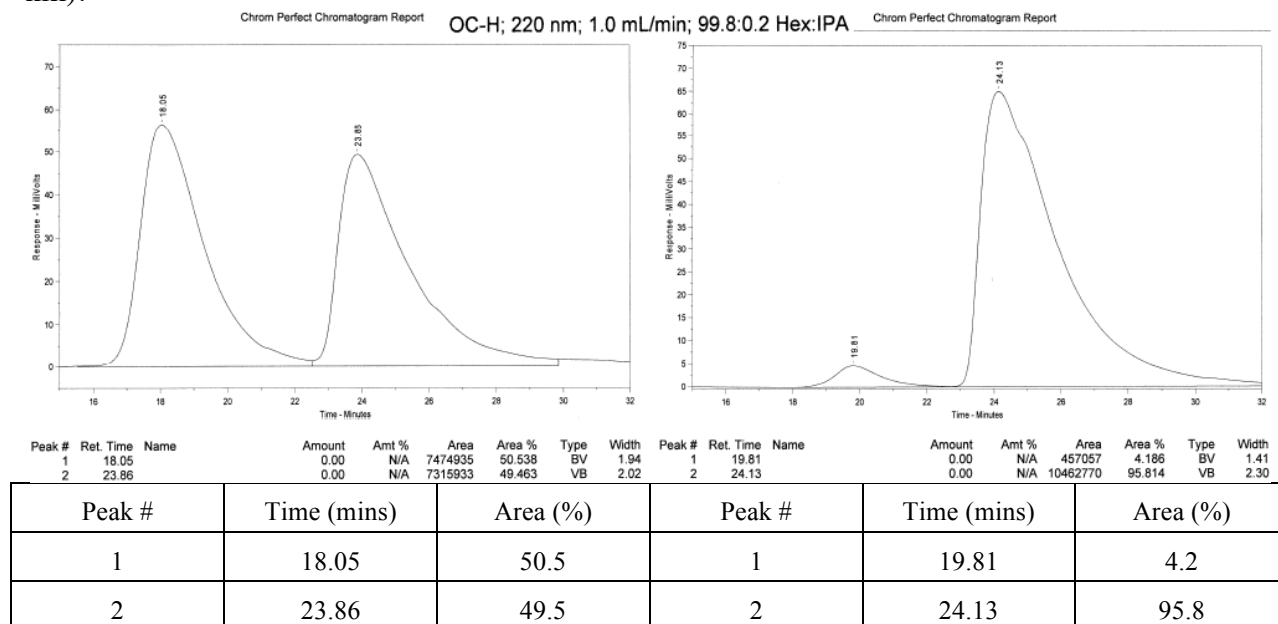

**Methyl (*S*)-2-(cyclohexyl(3,4-dihydro-2*H*-pyran-6-yl)methyl)acrylate (48, Scheme 10).** The title compound is prepared with 2.5 mol % **9c** and 25 mol % CuCl at 60 °C for 24 h following the same representative procedure. IR (neat) 2930 (m), 2850 (w), 1720 (s), 1670 (w), 1250 (s), 1230 (w), 1150 (m), 1120 (w), 1090 (w), 1060 (m) cm<sup>-1</sup>; <sup>1</sup>H NMR (400 MHz, CDCl<sub>3</sub>) δ 6.24 (1H, dd, *J* = 1.6, 0.8 Hz), 5.80 (1H, dd, *J* = 1.6, 0.8 Hz), 4.58 (1H, t, *J* = 3.6 Hz), 3.97–3.86 (2H, m), 3.74 (3H, s), 2.99 (1H, d, *J* = 10.4 Hz), 1.99–1.94 (2H, m), 1.82–1.57 (8H, m), 1.30–1.07 (3H, m), 0.96–0.76 (2H, m); <sup>13</sup>C NMR (100 MHz, CDCl<sub>3</sub>) δ 168.4, 153.1, 140.9, 124.9, 98.0, 66.3, 52.0, 50.9, 39.2, 31.6, 31.1, 26.7, 26.5, 26.4, 22.6, 20.6; HRMS (ESI<sup>+</sup>): [M+H]<sup>+</sup> Calcd for C<sub>16</sub>H<sub>25</sub>O<sub>3</sub>: 265.1804, found 265.1811.

Enantiomeric purity is determined by HPLC analysis in comparison with authentic racemic material (95:5 er shown; Chiralcel OD-H column, 100/0 hexanes/*i*-PrOH, 1.0 mL/min, 220 nm).

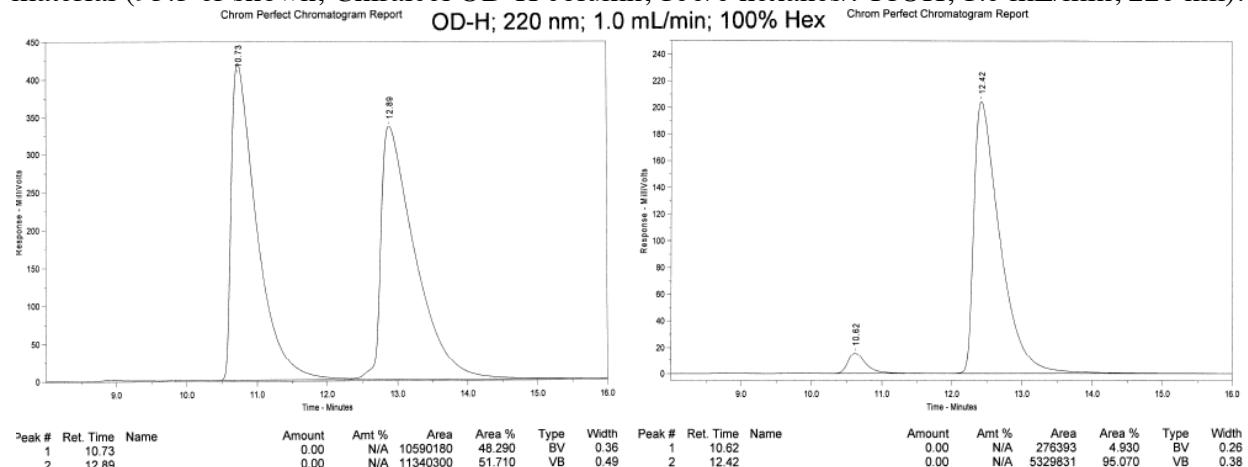

| Peak # | Time (mins) | Area (%) | Peak # | Time (mins) | Area (%) |
|--------|-------------|----------|--------|-------------|----------|
| 1      | 10.73       | 48.3     | 1      | 10.62       | 4.9      |
| 2      | 12.89       | 51.7     | 2      | 12.42       | 95.1     |

■ **Synthesis of Semburin (Scheme 11):** In this section, the EAS product **50** is prepared with imidazolium salt **9c** following the same representative procedure, as described for Table 1. **(S)-tert-Butyl((2-(3,6-dihydro-2H-pyran-4-yl)but-3-en-1-yl)oxy)dimethylsilane (50, Scheme 11)**. IR (neat): 2955 (w), 2928 (w), 2888 (w), 2855 (w), 1472 (w), 1384 (w), 1362 (w), 1253 (m), 1100 (s), 1005 (w), 915 (w), 833 (s), 773 (s), 665 (w)  $\text{cm}^{-1}$ ;  $^1\text{H}$  NMR (400 MHz,  $\text{CDCl}_3$ ):  $\delta$  5.82–5.73 (1H, m), 5.49–5.47 (1H, m), 5.10–5.05 (2H, m), 4.13 (2H, ddd,  $J = 5.2, 2.4, 0.8$  Hz), 3.81–3.72 (2H, m), 3.67 (2H, ddd,  $J = 22.0, 10.0, 6.4$  Hz), 2.81 (1H, dt,  $J = 7.6, 7.6$  Hz), 2.11–2.05 (2H, m), 0.88 (9H, s), 0.04 (6H, s);  $^{13}\text{C}$  NMR (100 MHz,  $\text{CDCl}_3$ ):  $\delta$  137.9, 135.4, 121.8, 116.1, 65.7, 64.8, 64.6, 53.1, 27.2, 26.0, 18.4, –5.16, –5.22; HRMS (ESI+): Calcd for  $\text{C}_{15}\text{H}_{29}\text{O}_2\text{Si}_1$   $[\text{M}+\text{H}]^+$ : 269.19368, Found: 269.19423. Specific Rotation:  $[\alpha]_{\text{D}}^{20} +15.8$  ( $c$  1.83,  $\text{CHCl}_3$ ) for an enantiomerically enriched sample of 83:17 er. Enantiomeric purity is determined by HPLC analysis of the derived lactone (see below).

To a 2-dram vial equipped with a magnetic stir bar is charged with dihydropyran **50** (53.7 mg, 0.200 mmol). The vessel is evacuated and refilled with  $\text{N}_2$  three times; under  $\text{N}_2$  atmosphere, dichloroethane (2.0 mL) is added through a syringe. The vessel is charged with pyridinium chlorochromate (PCC, 43.1 mg, 0.200 mmol) in one portion as a solid. The vial containing the orange suspension is sealed with a teflon-lined cap and allowed to warm to 80 °C and stir for 4 h (the orange suspension turns to dark brown suspension). At this time, an additional equivalent of PCC (43.1 mg, 0.200 mmol) is added to the above mixture and the resulting dark brown suspension is sealed again and allowed to stir at 80 °C for another 4 h. The third equivalent of PCC is introduced the same way, and the reaction is quenched 4 hours later through addition of *i*PrOH (2.0 mL). The mixture is allowed to cool to ambient temperature and stir for another 30 minutes, after which time it is passed through a plug of celite eluted with EtOAc. The volatiles are removed under reduced pressure to afford a brown oil residue, which is purified by silica gel column chromatography (4:1 hexanes/EtOAc) to deliver **51** as colorless oil (44.1 mg, 0.156 mmol, 78% yield). **(S)-4-(1-((tert-Butyldimethylsilyl)oxy)but-3-en-2-yl)-5,6-dihydro-2H-pyran-2-one (51, Scheme 11)**. IR (neat): 2954 (m), 2929 (m), 2896 (w), 2857 (m), 1727 (s), 1471 (w), 1420 (w), 1257 (m), 1220 (m), 1102 (s), 1086 (s), 1003 (w), 922 (w), 838 (s), 777 (m)  $\text{cm}^{-1}$ ;  $^1\text{H}$  NMR (400 MHz,  $\text{CDCl}_3$ ):  $\delta$  5.88–5.87 (1H, m), 5.77 (1H, ddd,  $J = 18.0, 10.4, 7.6$  Hz), 5.21 (1H, ddd,  $J = 10.4, 1.2, 1.2$  Hz), 5.16 (1H, ddd,  $J = 17.2, 1.2, 1.2$  Hz), 4.36 (2H, t,  $J = 6.0$  Hz), 3.80–3.72 (2H, m), 3.09 (1H, dt,  $J = 6.4, 6.4$  Hz), 2.43 (2H, dt,  $J = 6.0, 0.8$  Hz), 0.87 (9H, s), 0.04 (6H, d,  $J = 0.8$  Hz);  $^{13}\text{C}$  NMR (100 MHz,  $\text{CDCl}_3$ ):  $\delta$  164.8, 161.2, 134.7, 118.5, 117.3, 66.3, 64.4, 52.7, 26.6, 25.9, 18.3, –5.31, –5.38; HRMS (ESI+): Calcd for  $\text{C}_{15}\text{H}_{27}\text{O}_3\text{Si}_1$   $[\text{M}+\text{H}]^+$ : 283.17295, Found: 283.17397. Specific Rotation:  $[\alpha]_{\text{D}}^{20} +5.33$  ( $c$  0.912,  $\text{CHCl}_3$ ) for an enantiomerically enriched sample of 83:17 er.

Enantiomeric purity is determined by HPLC analysis in comparison with authentic racemic material (82:18 er shown; Chiralcel OD-H column, 99.8/0.2 hexanes/*i*-PrOH, 0.5 mL/min, 220 nm).

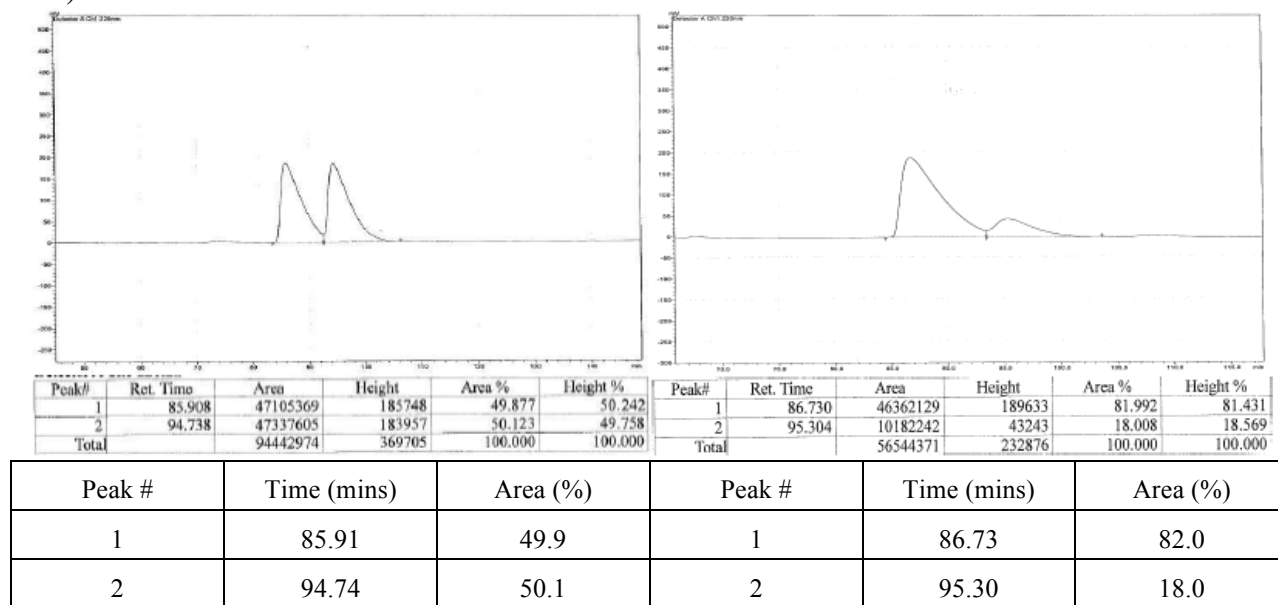

In an N<sub>2</sub>-filled glove box, an oven-dried 1-dram vial (15 x 45 mm) with a magnetic stir bar is charged with imidazolium salt **52** (3.2 mg, 0.0050 mmol), NaOtBu (1.9 mg, 0.020 mmol) and CuCl (0.5 mg, 0.005 mmol). The vial is sealed with a cap (phenolic open top cap with a red PTFE/white silicon septum) and electrical tape before removal from the glove box. To the vial under an N<sub>2</sub> atmosphere is added tetrahydrofuran (thf, 0.5 mL) and the resulting suspension is allowed to stir at 22 °C for one hour. The suspension turns from off-white to light yellow during catalyst formation. Poly(methylhydrosiloxane) (PMHS, 24.1 mg, 0.400 mmol) is introduced into the reaction vessel through a micro-syringe (the light yellow suspension turns to orange solution immediately). Meanwhile, in a separate vial, lactone **51** (28.2 mg, 0.100 mmol) and *t*-BuOH (29.6 mg, 0.400 mmol) are weighted out and the vial is sealed and purged with N<sub>2</sub> flow for 10 min before thf (0.5 mL) is added through a syringe. Both vials are allowed to cool to -50 °C in a dry ice/acetone bath and the substrate solution is transferred through a syringe to the vessel that contains the in situ-formed catalyst. The resulting bright yellow solution is allowed to stir at -50 °C for an additional 24 h. The mixture is then passed through a short plug of silica gel eluted with Et<sub>2</sub>O when it is still cold. The filtrate is concentrated under reduced pressure to provide a yellow oil residue, which is purified by silica gel column chromatography (4:1 hexanes/EtOAc) to afford product **53** as colorless oil (26.2 mg, 0.0921 mmol, 92% yield). (*S*)-4-((*S*)-1-((*tert*-Butyldimethylsilyloxy)but-3-en-2-yl)tetrahydro-2H-pyran-2-one (**53**, Scheme 11). The compound is characterized in the presence of 22% minor diastereomer. IR (neat): 2954 (w), 2928 (w), 2897 (w), 2857 (w), 1738 (s), 1472 (w), 1401 (w), 1252 (m), 1218 (m), 1079 (s), 1001 (m), 918 (w), 834 (s), 774 (s), 666 (w) cm<sup>-1</sup>; <sup>1</sup>H NMR (400 MHz, CDCl<sub>3</sub>): δ 5.64 (1H, ddd, *J* = 17.2, 10.0, 9.6 Hz), 5.15 (1H, dd, *J* = 10.4, 1.6 Hz), 5.09 (1H, ddd, *J* = 17.2, 2.0, 0.8 Hz), 4.43–4.36 (1H, m), 4.24 (1H, ddd, *J* = 11.6, 10.8, 3.6 Hz), 3.67 (1H, dd, *J* = 10.4, 4.8 Hz), 3.59 (1H, dd, *J* =

10.4, 6.0 Hz), 2.64–2.60 (1H, m), 2.29–2.20 (2H, m), 2.10 (1H, ddd,  $J = 14.8, 6.0, 4.8$  Hz), 1.98–1.92 (1H, m), 1.70–1.60 (1H, m), 0.87 (9H, s), 0.03 (6H, s);  $^{13}\text{C}$  NMR (100 MHz,  $\text{CDCl}_3$ ):  $\delta$  171.9, 136.2, 118.4, 68.7, 63.8, 50.9, 33.7, 31.5, 27.2, 26.0, 18.4, –5.3, –5.4; HRMS (ESI+): Calcd for  $\text{C}_{15}\text{H}_{29}\text{O}_3\text{Si}_1$   $[\text{M}+\text{H}]^+$ : 285.18860, Found: 285.18790. Specific Rotation:  $[\alpha]_{\text{D}}^{20} -27.2$  ( $c$  1.00,  $\text{CHCl}_3$ ) for an enantiomerically enriched sample of 96:4 er (major diastereomer). Enantiomeric purity is determined by GLC analysis of natural product semburin (see below).

### ■ Screening Data for Cu-Catalyzed Enantioselective Reduction of Unsaturated Lactone with Poly(methylhydrosiloxane):

Figure S1. Screening Data of Various Phosphines and NHCs for Cu-Catalyzed Reduction

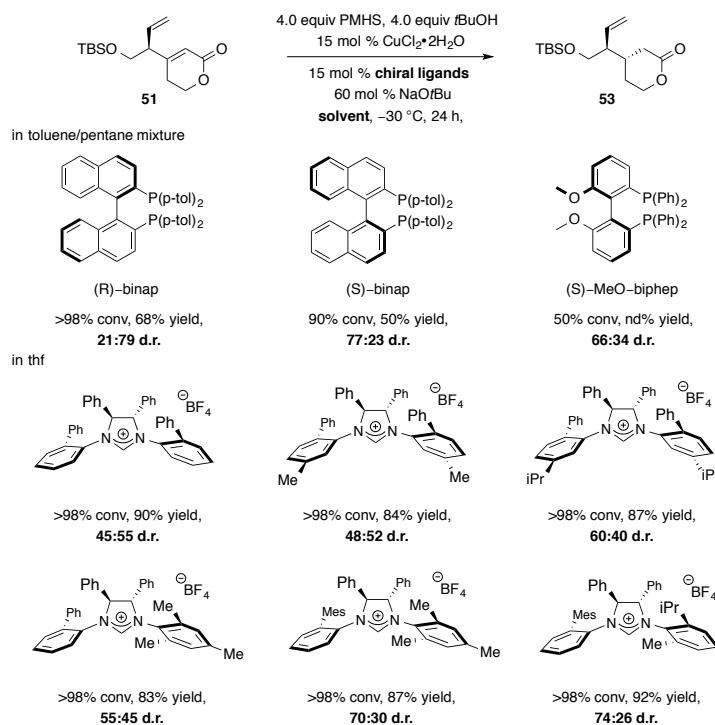

To a 2-dram vial equipped with a magnetic stir bar is charged with lactone **53** (26.2 mg, 0.0921 mmol). The vessel is evacuated and refilled with  $\text{N}_2$  three times; under  $\text{N}_2$  atmosphere, tetrahydrofuran (thf, 1.0 mL) is added through a syringe. The solution is allowed to cool to  $0^\circ\text{C}$  in an ice bath followed by dropwise addition of tetrabutylammonium fluoride solution (184  $\mu\text{L}$ , 0.184 mmol, 1.0 M in thf). The resulting light yellow solution is allowed to stir for an additional 30 minutes at  $0^\circ\text{C}$  before the reaction is quenched by the addition of a saturated solution of  $\text{NH}_4\text{Cl}$  (1.0 mL). The layers are separated and the aqueous phase is washed with  $\text{EtOAc}$  (3 x 1.0 mL). The combined organic layers are dried over anhydrous  $\text{MgSO}_4$ , filtered and volatiles removed under reduced pressure to afford a light yellow oil residue, which is purified by silica gel column chromatography. A flame-dried 6-dram vial (23 x 85 mm) is charged with the alcohol product (15.7 mg, 0.0921 mmol, >98% yield) and a stir bar. The vial is sealed with a septum and purged with  $\text{N}_2$  flow for 10 minutes.  $\text{CH}_2\text{Cl}_2$  (1.0 mL) is added to the vessel through a syringe. The vial is allowed to cool to  $-78^\circ\text{C}$  in a dry ice/acetone bath followed by dropwise

addition of diisobutyl aluminum hydride as a solution in  $\text{CH}_2\text{Cl}_2$  (0.5 M stock solution, 202  $\mu\text{L}$ , 0.101 mmol). The resulting solution is allowed to stir for one hour at  $-78\text{ }^\circ\text{C}$  before the reaction is quenched by addition of methyl alcohol (0.5 mL). The solution is then allowed to warm to  $22\text{ }^\circ\text{C}$ ; saturated Rochelle's salt solution (1.0 mL) is added. The mixture is allowed to stir until two clear layers formed and the aqueous layer is washed with  $\text{Et}_2\text{O}$  (3 x 1.0 mL). The combined organic layers are dried over anhydrous  $\text{MgSO}_4$ , filtered and concentrated *in vacuo* to afford a colorless oil residue. A separate 6-dram vial (23 x 85 mm) is charged with the residue, pyridinium *p*-toluenesulfonate (25.4 mg, 0.101 mmol) and a stir bar. The vial is sealed with a septum and purged with  $\text{N}_2$  flow for 10 minutes before 1.0 mL benzene is added through a syringe. The septum is quickly switched to a teflon-lined cap and the resulting suspension is allowed to warm to  $80\text{ }^\circ\text{C}$  and stir for additional 20 h, after which time the reaction is quenched by passing through a plug of silica gel eluted with  $\text{Et}_2\text{O}$ . The filtrate is concentrated under reduced pressure to afford a colorless oil residue, which is purified by preparative thin-layer chromatography to separate the diastereomers (100%  $\text{CH}_2\text{Cl}_2$ ), furnishing the desired natural product as colorless oil (9.2 mg, 0.060 mmol, 65% yield). Note: the separation of diastereomers can be tedious. Usually the first half of the TLC band is collected and the second half is resubjected to preparative TLC. The process is repeated two more times to maximize the yield (semburin can be volatile; minimum  $\text{Et}_2\text{O}$  should be used to retrieve the natural product and careful evaporation should be performed). **Semburin (Scheme 11)**. The natural product has been previously reported and the spectral data match those described before.<sup>15</sup>  $^1\text{H}$  NMR (500 MHz,  $\text{C}_6\text{D}_6$ ):  $\delta$  5.38 (1H, ddd,  $J = 17.5, 11.0, 6.5$  Hz), 5.31 (1H, d,  $J = 1.0$  Hz), 4.91 (1H, ddd,  $J = 10.5, 1.5, 1.0$  Hz), 4.79 (1H, ddd,  $J = 17.5, 1.5, 1.5$  Hz), 4.06 (1H, dd,  $J = 12.0, 11.5$  Hz), 3.73–3.66 (2H, m), 3.42–3.37 (1H, m), 2.39–2.32 (1H, m), 1.70–1.57 (3H, m), 1.36–1.25 (2H, m);  $^{13}\text{C}$  NMR (125 MHz,  $\text{C}_6\text{D}_6$ ):  $\delta$  137.8, 115.6, 92.4, 61.6, 60.3, 44.0, 30.3, 25.9, 23.9; HRMS (ESI+): Calcd for  $\text{C}_9\text{H}_{15}\text{O}_2$   $[\text{M}+\text{H}]^+$ : 155.10720, Found: 155.10705. Specific Rotation:  $[\alpha]_{\text{D}}^{20} +1.49$  ( $c$  0.267,  $\text{CHCl}_3$ ) for an enantiomerically enriched sample of 96:4 er.

Enantiomeric purity is determined by GLC analysis in comparison with authentic racemic material (96:4 er shown; CDGTA column,  $100\text{ }^\circ\text{C}$ , 15 psi). The first set of racemic enantiomers corresponds to the diastereomer of semburin.

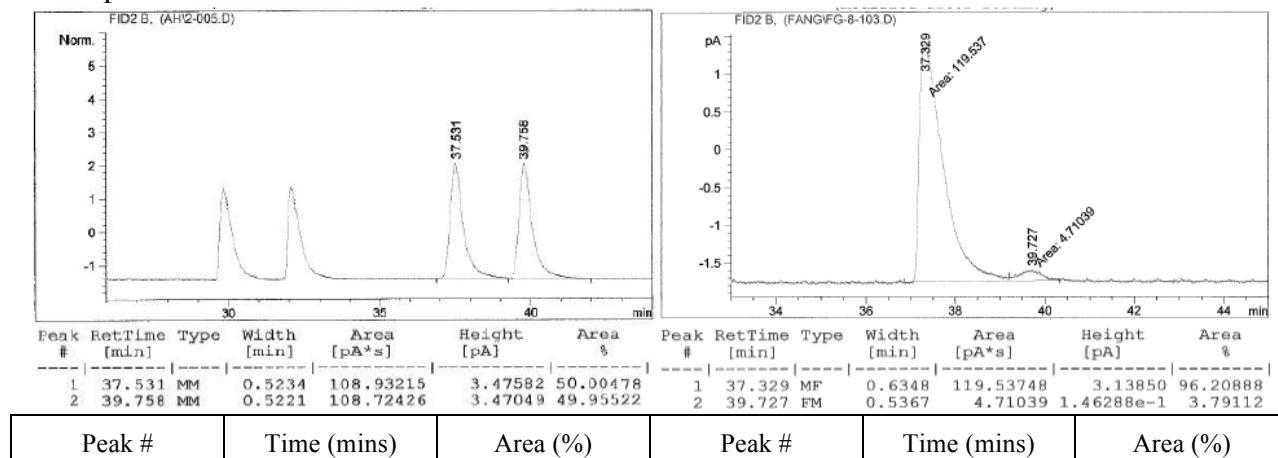

|   |       |      |   |       |      |
|---|-------|------|---|-------|------|
| 1 | 37.53 | 50.0 | 1 | 37.33 | 96.2 |
| 2 | 39.76 | 50.0 | 2 | 39.73 | 3.8  |

■ **Experimental Procedure for NHC–Cu-Catalyzed Enantioselective Allylic Substitution (EAS) with 1,1-Disubstituted Alkenylboron Reagents (Scheme 12):** In this section, the reactions are performed following the same representative procedure as described for Table 1. The specific differences are included within the characterization data of each compound.

***tert*-Butyl (*R*)-(3-(3-bromophenyl)-2-methylenepent-4-en-1-yl)carbamate (**57a**, Scheme 12).**

The title compound is prepared at 60 °C for 24 h following the same general procedure. IR (neat): 3348 (w), 2977 (w), 2928 (w), 1701 (s), 1567 (w), 1508 (m), 1473 (w), 1391 (w), 1366 (m), 1271 (m), 1169 (s), 1073 (w), 1049 (w), 997 (w), 945 (m), 862 (w), 781 (w), 702 (w) cm<sup>-1</sup>; <sup>1</sup>H NMR (400 MHz, CDCl<sub>3</sub>): δ 7.37–7.33 (2H, m), 7.18 (1H, dd, *J* = 7.6, 7.6 Hz), 7.13 (1H, ddd, *J* = 7.6, 1.2, 1.2 Hz), 6.05 (1H, ddd, *J* = 17.2, 10.0, 7.2 Hz), 5.20–5.17 (2H, m), 4.99–4.94 (2H, m), 4.55 (1H, br s), 4.00 (1H, d, *J* = 7.2 Hz), 3.64 (2H, br s), 1.43 (9H, s); <sup>13</sup>C NMR (100 MHz, CDCl<sub>3</sub>): δ 156.2, 148.7, 146.0, 138.6, 132.9, 130.5, 128.9, 127.7, 126.1, 117.4, 111.4, 79.1, 45.3, 40.8, 28.4; HRMS (ESI+): Calcd for C<sub>12</sub>H<sub>14</sub>BrN<sub>1</sub>[M+H–Boc]<sup>+</sup>: 251.03096, Found: 251.03035. Specific Rotation: [α]<sub>D</sub><sup>20</sup> +67.1 (*c* 0.532, CHCl<sub>3</sub>) for an enantiomerically enriched sample of 98:2 er.

Enantiomeric purity is determined by HPLC analysis in comparison with authentic racemic material (98:2 er shown; Chiralcel OD-H column, 99/1 hexanes/*i*-PrOH, 0.5 mL/min, 220 nm).

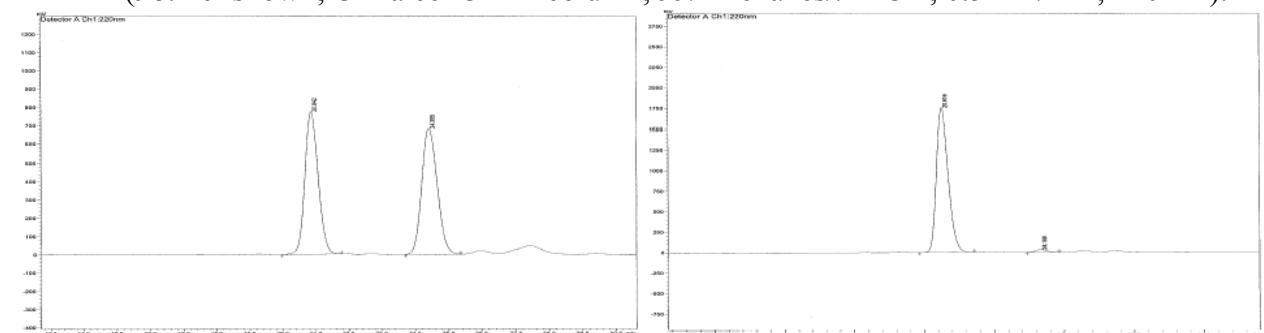

| Peak# | Ret. Time | Area     | Height  | Area %  | Height % | Peak# | Ret. Time | Area     | Height  | Area %  | Height % |
|-------|-----------|----------|---------|---------|----------|-------|-----------|----------|---------|---------|----------|
| 1     | 20.842    | 21899279 | 773288  | 50.080  | 53.108   | 1     | 20.616    | 51552876 | 1752120 | 98.177  | 98.222   |
| 2     | 24.395    | 21829267 | 682790  | 49.920  | 46.892   | 2     | 24.168    | 957452   | 31710   | 1.823   | 1.778    |
| Total |           | 43728546 | 1456077 | 100.000 | 100.000  | Total |           | 52510328 | 1783829 | 100.000 | 100.000  |

| Peak # | Time (mins) | Area (%) | Peak # | Time (mins) | Area (%) |
|--------|-------------|----------|--------|-------------|----------|
| 1      | 20.84       | 50.1     | 1      | 20.62       | 98.2     |
| 2      | 24.40       | 49.9     | 2      | 24.17       | 1.8      |

**(*S*)-Dimethyl(phenyl)(2-phenylpenta-1,4-dien-3-yl)silane (**57b**, Scheme 12).** IR (neat): 3070 (w), 3052 (w), 3023 (w), 2958 (w), 2898 (w), 1616 (w), 1491 (w), 1426 (w), 1301 (w), 1249 (m), 1112 (m), 995 (w), 897 (m), 830 (s), 813 (s), 772 (s), 724 (s), 696 (s), 654 (s), 469 (m) cm<sup>-1</sup>; <sup>1</sup>H NMR (400 MHz, CDCl<sub>3</sub>): δ 7.46–7.42 (2H, m), 7.36–7.18 (8H, m), 5.98 (1H, ddd, *J* = 17.6, 12.4, 9.2 Hz), 5.21 (1H, dd, *J* = 0.8, 0.8 Hz), 4.98–4.93 (2H, m), 4.83 (1H, s), 3.14 (1H, d, *J* = 9.6 Hz), 0.252 (3H, s), 0.246 (3H, s); <sup>13</sup>C NMR (100 MHz, CDCl<sub>3</sub>): δ 149.1, 144.4, 138.9, 137.2, 134.4, 129.2, 128.2, 127.6, 127.3, 126.6, 112.6, 111.9, 42.7, –3.7, –4.4; HRMS (ESI+): Calcd for

$C_{19}H_{23}Si_1$   $[M+H]^+$ : 279.15690, Found: 279.15733. Specific Rotation:  $[\alpha]_D^{20} -144$  ( $c$  1.73,  $CHCl_3$ ) for an enantiomerically enriched sample of 97:3 er.

Enantiomeric purity is determined by HPLC analysis in comparison with authentic racemic material (97:3 er shown; Chiralcel OD-H column, 100/0 hexanes/*i*-PrOH, 0.5 mL/min, 254 nm).

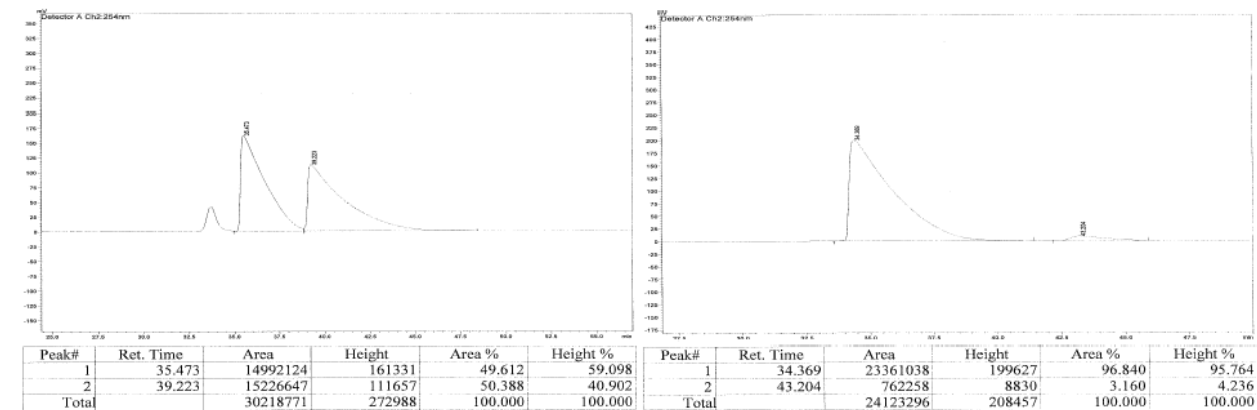

| Peak # | Time (mins) | Area (%) | Peak # | Time (mins) | Area (%) |
|--------|-------------|----------|--------|-------------|----------|
| 1      | 35.47       | 49.6     | 1      | 34.37       | 96.8     |
| 2      | 39.23       | 50.4     | 2      | 43.20       | 3.2      |

■ **Experimental Procedure for NHC–Cu-Catalyzed Enantioselective Allylic Substitution (EAS) with Vinyl–B(pin) (Scheme 13):** In a nitrogen-filled glovebox, an oven-dried vial equipped with a magnetic stir bar is charged with imidazolium salt **9b** (2.1 mg, 0.0025 mmol), NaOMe (8.1 mg, 0.15 mmol) and CuCl (2.5 mg, 0.025 mmol). The vial is sealed with a screw cap fitted with a Teflon septum and removed from the glovebox. Tetrahydrofuran (thf, 0.5 mL) is added and the suspension is allowed to stir for 2 h at 22 °C. A solution of methyl (*E*)-2-(((diethoxyphosphoryl)oxy)methyl)-3-(naphthalen-2-yl)acrylate (37.8 mg, 0.100 mmol) and vinylboronic acid pinacol ester (**22**, 30.8 mg, 0.200 mmol) in thf (0.4 mL) is then prepared in an oven-dried vial equipped with a septum. The solution is transferred to the vessel that contains the catalyst solution, with the vial further rinsed with thf (0.1 mL). The septum-fitted screw cap is rapidly exchanged for a standard screw cap, the vial sealed with electrical tape and allowed to warm to 60 °C and kept stirring for 20 h. After this time the mixture is allowed to cool to ambient temperature and partitioned between water and ethyl acetate. The aqueous solution is washed with more ethyl acetate (3 x 1.0 mL). The combined organic layers are dried over anhydrous  $MgSO_4$ , filtered and concentrated *in vacuo*. The oil residue is purified by silica gel column chromatography (50:1 to 25:1 hexanes/ $Et_2O$ ) to deliver the desired product **59a** as colorless oil (17.4 mg, 0.0690 mmol, 69% yield). **Methyl (*S*)-2-methylene-3-(naphthalen-2-yl)pent-4-enoate (**59a**, Scheme 13).** IR (neat): 1720 (s), 1190 (s), 1100 (s), 920 (m), 900 (m), 820 (s), 750 (s), 470 (s)  $cm^{-1}$ ;  $^1H$  NMR (400 MHz,  $CDCl_3$ )  $\delta$  7.82–7.77 (3H, m), 7.63 (1H, br d,  $J$  = 1.2 Hz), 7.46 (1H, ddd,  $J$  = 7.2, 7.2, 2.8 Hz), 7.43 (1H, ddd,  $J$  = 7.2, 6.4, 2.8 Hz), 7.33 (1H, d,  $J$  = 8.4, 1.2 Hz), 6.42 (1H, dd,  $J$  = 0.8, 0.4 Hz), 7.17 (1H, ddd,  $J$  = 17.2, 10.0, 6.8 Hz), 5.64 (1H, t,  $J$  = 1.2 Hz), 5.23 (1H, dt,  $J$  = 10.0, 1.2 Hz), 4.99 (1H, dt,  $J$  = 17.2, 1.2 Hz), 4.84 (1H, d,  $J$  = 6.8

Hz), 3.68 (3H, s);  $^{13}\text{C}$  NMR (125 MHz,  $\text{CDCl}_3$ )  $\delta$  167.3, 142.5, 138.9, 138.4, 133.6, 132.5, 128.2, 127.9, 127.7, 127.3, 127.0, 126.6, 126.1, 125.7, 117.1, 52.1, 50.3; HRMS (ESI $^+$ ): Calcd for  $\text{C}_{17}\text{H}_{17}\text{O}_2$  [M+H] $^+$ : 253.1229, Found: 253.1233.

Enantiomeric purity is determined by HPLC analysis in comparison with authentic racemic material (99:1 er shown; Chiralcel OJ-H column, 99.5/0.5 hexanes/*i*-PrOH, 0.8 mL/min, 220 nm).

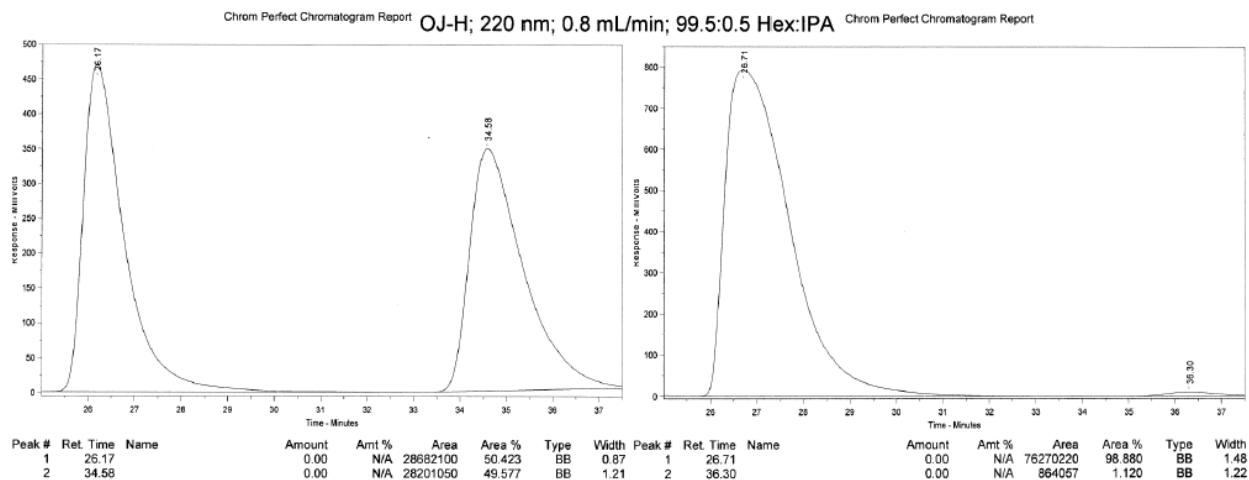

| Peak # | Time (mins) | Area (%) | Peak # | Time (mins) | Area (%) |
|--------|-------------|----------|--------|-------------|----------|
| 1      | 26.17       | 50.4     | 1      | 26.71       | 98.9     |
| 2      | 34.58       | 49.6     | 2      | 36.30       | 1.1      |

**Methyl (*S*)-2-methylene-3-(4-(trifluoromethyl)phenyl)pent-4-enoate (59b, Scheme 13).** The title compound is prepared with 10 mol % imidazolium salt **9b** and 10 mol % CuCl following the same representative procedure. IR (neat): 1720 (m), 1320 (s), 1250 (w), 1160 (m), 1120 (s), 1070 (s), 1000 (w)  $\text{cm}^{-1}$ ;  $^1\text{H}$  NMR (400 MHz,  $\text{CDCl}_3$ )  $\delta$  7.56 (2H, d,  $J = 8.2$  Hz), 7.31 (2H, d,  $J = 8.2$  Hz), 6.42 (1H, s), 6.08 (1H, ddd,  $J = 17.2, 10.0, 6.8$  Hz), 5.64 (1H, s), 5.23 (1H, br d,  $J = 10.0$  Hz), 4.94 (1H, dt,  $J = 17.2, 1.2$  Hz), 4.71 (1H, br d,  $J = 6.8$  Hz), 3.69 (3H, s);  $^{13}\text{C}$  NMR (125 MHz,  $\text{CDCl}_3$ )  $\delta$  166.9, 145.0, 141.9, 138.2, 129.3, 128.9, 127.0, 125.6, 125.5, 125.5, 117.6, 52.2, 50.2, 24.9; HRMS (ESI $^+$ ): Calcd for  $\text{C}_{14}\text{H}_{14}\text{F}_3\text{O}_2$  [M+H] $^+$ : 271.0946, Found: 271.0939.

Enantiomeric purity is determined by HPLC analysis in comparison with authentic racemic material (97:3 er shown; Chiralcel OC-H column, 99.8/0.2 hexanes/*i*-PrOH, 1.0 mL/min, 220 nm).



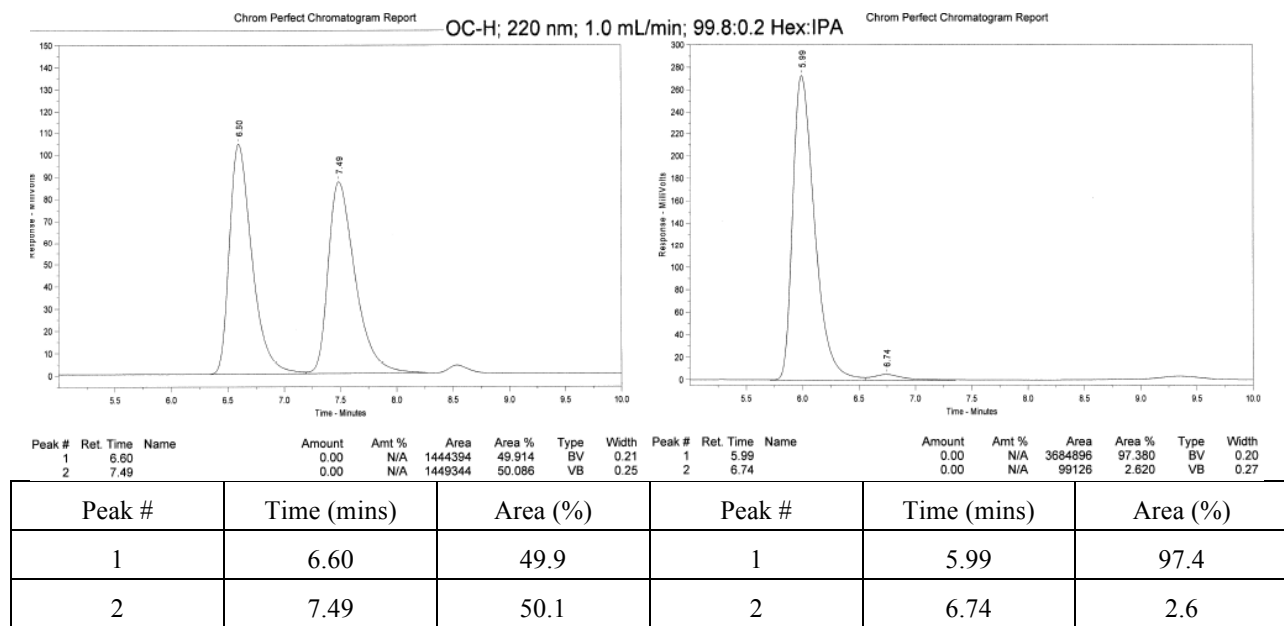

**Methyl (*S*)-3-(2-(methoxymethoxy)phenyl)-2-methylenepent-4-enoate (59c, Scheme 13).** The title compound is prepared with 3.0 equiv of **22** following the same representative procedure.  $^1\text{H}$  NMR (400 MHz,  $\text{CDCl}_3$ )  $\delta$  7.19 (1H, ddd,  $J = 8.0, 7.2, 1.6$  Hz), 7.11 (1H, dd, 7.6, 1.6 Hz), 7.08 (1H, dd,  $J = 8.0, 1.2$  Hz), 6.96 (1H, ddd,  $J = 7.6, 7.2, 1.2$  Hz), 6.34 (1H, dd,  $J = 1.2, 0.8$  Hz), 6.06 (1H, ddd,  $J = 17.2, 10.4, 6.4$  Hz), 5.49 (1H, dd,  $J = 1.2, 0.8$  Hz), 5.19 (2H, s), 5.18 (1H, dt,  $J = 10.4, 1.6$  Hz), 5.11 (1H, br dd,  $J = 6.4, 0.8$  Hz), 4.94 (1H, dt,  $J = 17.2, 1.6$  Hz), 3.70 (3H, s), 3.46 (3H, s);  $^{13}\text{C}$  NMR (125 MHz,  $\text{CDCl}_3$ )  $\delta$  167.4, 154.6, 142.4, 138.4, 130.1, 128.9, 128.0, 126.2, 121.7, 116.6, 114.4, 94.4, 56.2, 52.0, 43.1; HRMS (ESI $^+$ ): Calcd for  $\text{C}_{15}\text{H}_{19}\text{O}_4$   $[\text{M}+\text{H}]^+$ : 263.1283. Enantiomeric purity is determined by HPLC analysis in comparison with authentic racemic material (98.5:1.5 er shown; Chiralcel OC-H column, 99/1 hexanes/*i*-PrOH, 1.0 mL/min, 220 nm).

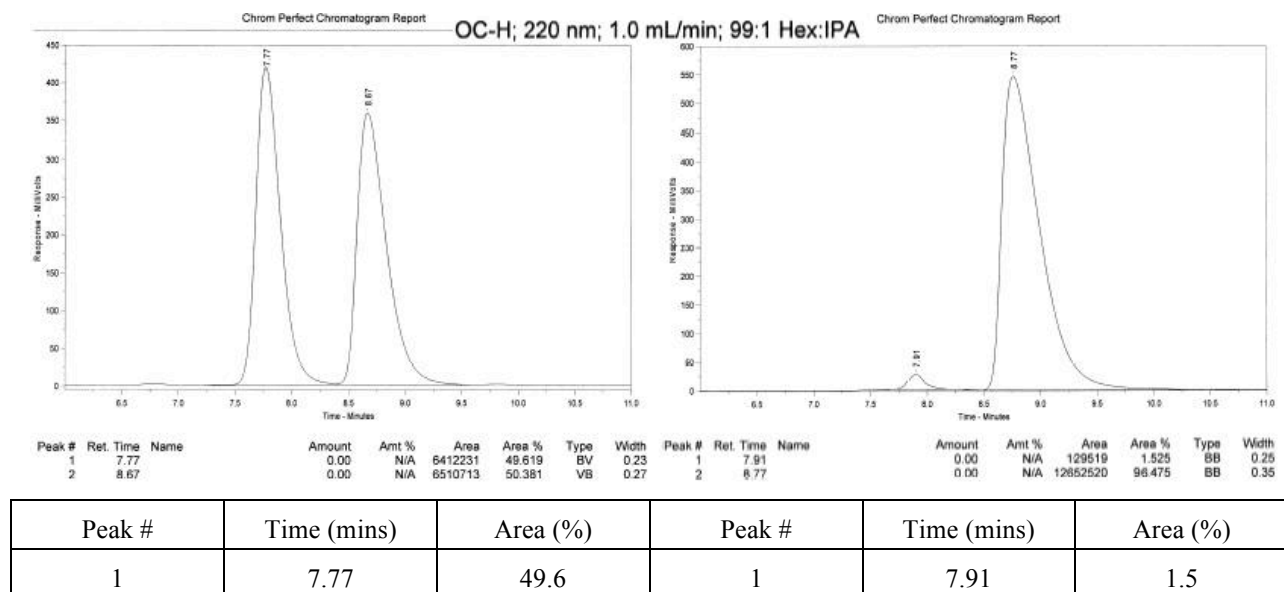

|   |      |      |   |      |      |
|---|------|------|---|------|------|
| 2 | 8.67 | 50.4 | 2 | 8.77 | 98.5 |
|---|------|------|---|------|------|

**Methyl (*S*)-2-methylene-3-phenylpent-4-enoate (59d, Scheme 13).** The title compound is prepared with 10 mol % imidazolium salt **9b** and 10 mol % CuCl following the same representative procedure. IR (neat): 1720 (s), 1440 (w), 1250 (m), 1140 (m), 920 (w), 700 (m)  $\text{cm}^{-1}$ ;  $^1\text{H}$  NMR (400 MHz,  $\text{CDCl}_3$ )  $\delta$  7.32–7.28 (2H, m), 7.24–7.18 (3H, m), 6.36 (1H, dd,  $J = 1.0, 0.6$  Hz), 6.10 (1H, ddd,  $J = 17.0, 10.0, 6.8$  Hz), 5.58 (1H, t,  $J = 1.2$  Hz), 5.18 (1H, dt,  $J = 10.4, 1.2$  Hz), 4.95 (1H, dt,  $J = 17.0, 1.2$  Hz), 4.67 (1H, br d,  $J = 6.8$  Hz), 3.69 (s, 3H);  $^{13}\text{C}$  NMR (100 MHz,  $\text{CDCl}_3$ )  $\delta$  167.3, 142.7, 140.8, 139.0, 128.6, 128.5, 126.7, 126.4, 116.8, 52.1, 50.3; HRMS (ESI<sup>+</sup>):  $[\text{M}+\text{H}]^+$  Calcd for  $\text{C}_{13}\text{H}_{15}\text{O}_2$ : 203.10720, found 203.10777.

Enantiomeric purity is determined by HPLC analysis in comparison with authentic racemic material (99:1 er shown; Chiralcel OC-H column, 99.8/0.2 hexanes/*i*-PrOH, 1.0 mL/min, 220 nm).

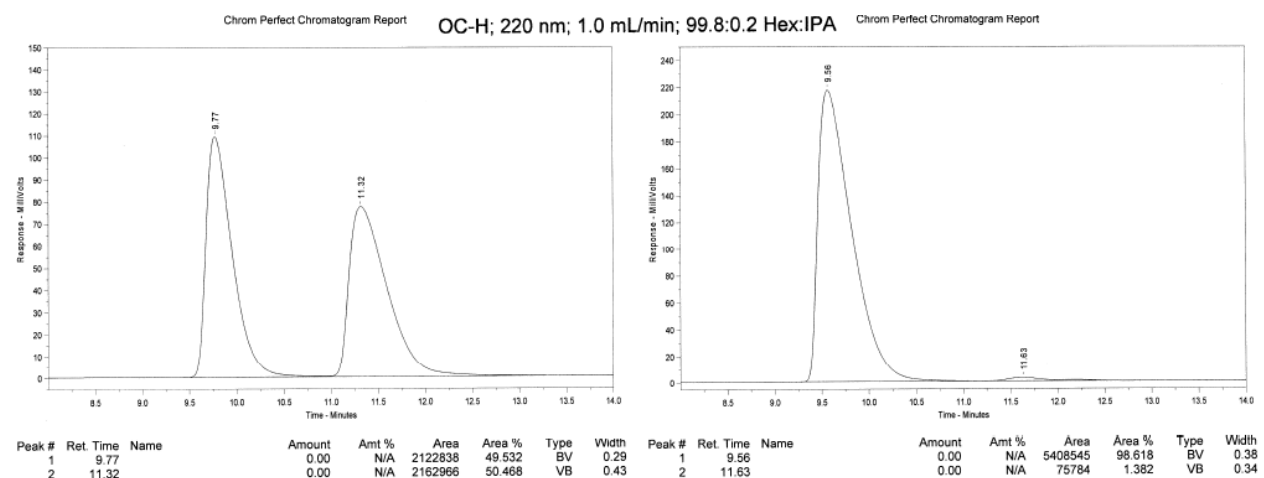

| Peak # | Time (mins) | Area (%) | Peak # | Time (mins) | Area (%) |
|--------|-------------|----------|--------|-------------|----------|
| 1      | 9.77        | 49.5     | 1      | 9.56        | 98.6     |
| 2      | 11.32       | 50.5     | 2      | 11.63       | 1.4      |

**Methyl (*R*)-3-cyclohexyl-2-methylenepent-4-enoate (61, Scheme 13).** The title compound is prepared with 1.0 mol % imidazolium salt **9c** and 10 mol % CuCl following the same representative procedure. IR (neat): 2920 (m), 2850 (w), 1720 (s), 1250 (m), 1190 (w), 1160 (m), 1130 (m), 910 (w),  $\text{cm}^{-1}$ ;  $^1\text{H}$  NMR (400 MHz,  $\text{CDCl}_3$ )  $\delta$  6.20 (1H, d,  $J = 1.2$  Hz), 5.84 (1H, dddd,  $J = 17.6, 13.2, 9.2, 6.4$  Hz), 5.51 (1H, t,  $J = 1.2$  Hz), 5.03 (1H, dt,  $J = 17.6, 1.2$  Hz), 5.00 (1H, dt,  $J = 13.2, 1.3$  Hz), 3.75 (3H, s), 2.96 (1H, t,  $J = 9.2$  Hz), 1.82–1.60 (5H, m), 1.58–1.48 (1H, m), 1.25–1.05 (3H, m), 0.93–7.90 (2H, m);  $^{13}\text{C}$  NMR (125 MHz,  $\text{CDCl}_3$ )  $\delta$  167.7, 142.7, 139.5, 125.0, 116.0, 52.8, 51.9, 40.3, 31.5, 30.8, 26.6, 26.5, 26.4; HRMS (ESI<sup>+</sup>): Calcd for  $\text{C}_{13}\text{H}_{21}\text{O}_2$   $[\text{M}+\text{H}]^+$ : 209.1542, Found: 209.1550.

Enantiomeric purity is determined by HPLC analysis in comparison with authentic racemic material (96:4 er shown; Chiralcel OZ-H column, 100/0 hexanes/*i*-PrOH, 0.8 mL/min, 220 nm).

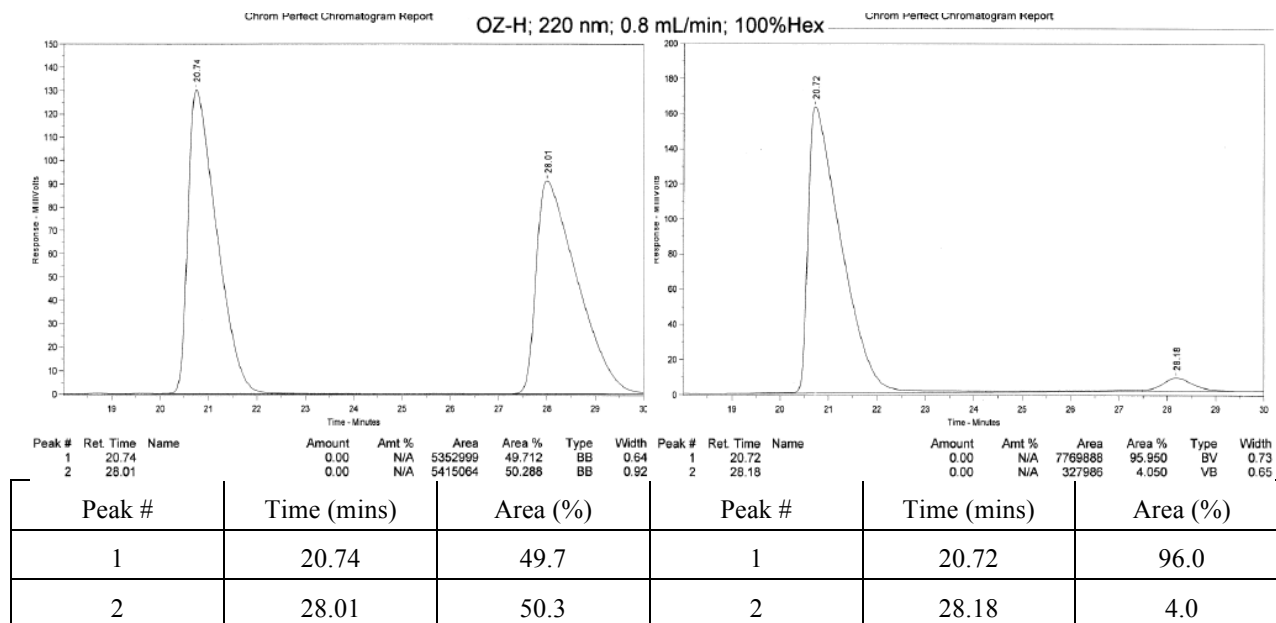

■ **Determination of stereochemical identity: Crystal Structure of 47a (Scheme 10).** The crystal structure secured for **47a** is assigned to the (*S*) enantiomer. For details, refer to the crystallography data attached.

**Figure S2.** Crystal Structure of Compound **47a**

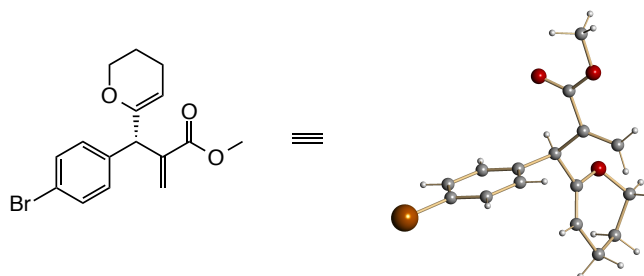

■ **Data for X-ray Crystallography of Compound 47a:**

**Table 1.** Crystal data and structure refinement for C<sub>16</sub>H<sub>17</sub>BrO<sub>3</sub>.

|                      |                                                   |          |
|----------------------|---------------------------------------------------|----------|
| Identification code  | C <sub>16</sub> H <sub>17</sub> BrO <sub>3</sub>  |          |
| Empirical formula    | C <sub>16</sub> H <sub>17</sub> Br O <sub>3</sub> |          |
| Formula weight       | 337.21                                            |          |
| Temperature          | 100(2) K                                          |          |
| Wavelength           | 0.71073 Å                                         |          |
| Crystal system       | Orthorhombic                                      |          |
| Space group          | P2(1)2(1)2(1)                                     |          |
| Unit cell dimensions | a = 6.1590(3) Å                                   | α = 90°. |

|                                       |                                                                 |                       |
|---------------------------------------|-----------------------------------------------------------------|-----------------------|
|                                       | $b = 9.1136(5) \text{ \AA}$                                     | $\beta = 90^\circ$ .  |
|                                       | $c = 25.9848(13) \text{ \AA}$                                   | $\gamma = 90^\circ$ . |
| Volume                                | $1458.54(13) \text{ \AA}^3$                                     |                       |
| Z                                     | 4                                                               |                       |
| Density (calculated)                  | $1.536 \text{ Mg/m}^3$                                          |                       |
| Absorption coefficient                | $2.823 \text{ mm}^{-1}$                                         |                       |
| F(000)                                | 688                                                             |                       |
| Crystal size                          | $0.24 \times 0.14 \times 0.06 \text{ mm}^3$                     |                       |
| Theta range for data collection       | $2.37$ to $28.41^\circ$ .                                       |                       |
| Index ranges                          | $-8 \leq h \leq 8$ , $-12 \leq k \leq 9$ , $-34 \leq l \leq 34$ |                       |
| Reflections collected                 | 26659                                                           |                       |
| Independent reflections               | 3643 [R(int) = 0.0216]                                          |                       |
| Completeness to theta = $28.41^\circ$ | 99.9 %                                                          |                       |
| Absorption correction                 | Semi-empirical from equivalents                                 |                       |
| Max. and min. transmission            | 0.8489 and 0.5507                                               |                       |
| Refinement method                     | Full-matrix least-squares on $F^2$                              |                       |
| Data / restraints / parameters        | 3643 / 4 / 194                                                  |                       |
| Goodness-of-fit on $F^2$              | 1.056                                                           |                       |
| Final R indices [I > 2sigma(I)]       | R1 = 0.0168, wR2 = 0.0452                                       |                       |
| R indices (all data)                  | R1 = 0.0176, wR2 = 0.0455                                       |                       |
| Absolute structure parameter          | 0.018(6)                                                        |                       |
| Extinction coefficient                | na                                                              |                       |
| Largest diff. peak and hole           | $0.312$ and $-0.469 \text{ e. \AA}^{-3}$                        |                       |

**Table 2. Atomic coordinates ( $\times 10^4$ ) and equivalent isotropic displacement parameters ( $\text{\AA}^2 \times 10^3$ ) for  $\text{C}_{16}\text{H}_{17}\text{BrO}_3$ . U (eq) is defined as one third of the trace of the orthogonalized  $U^{ij}$  tensor.**

---

|   |   |   |       |
|---|---|---|-------|
| x | y | z | U(eq) |
|---|---|---|-------|

---

|       |         |          |         |       |
|-------|---------|----------|---------|-------|
| Br(1) | 9961(1) | -2636(1) | 2472(1) | 21(1) |
| O(1)  | 2648(2) | 3595(1)  | 3922(1) | 19(1) |
| O(2)  | 2389(2) | -1268(1) | 4346(1) | 23(1) |
| O(3)  | 3796(2) | -770(1)  | 5124(1) | 19(1) |
| C(1)  | 8198(2) | -1468(1) | 2909(1) | 15(1) |
| C(2)  | 8992(2) | -1038(1) | 3383(1) | 16(1) |
| C(3)  | 7697(2) | -171(1)  | 3700(1) | 15(1) |
| C(4)  | 5624(2) | 263(1)   | 3545(1) | 14(1) |
| C(5)  | 4869(2) | -199(1)  | 3066(1) | 16(1) |
| C(6)  | 6131(2) | -1069(1) | 2746(1) | 17(1) |
| C(7)  | 4186(2) | 1236(1)  | 3880(1) | 13(1) |
| C(8)  | 4481(2) | 2849(2)  | 3769(1) | 15(1) |
| C(9)  | 6248(2) | 3487(2)  | 3575(1) | 18(1) |
| C(10) | 6390(2) | 5100(2)  | 3471(1) | 22(1) |
| C(11) | 4170(3) | 5818(2)  | 3537(1) | 26(1) |
| C(12) | 2997(2) | 5142(2)  | 3990(1) | 22(1) |
| C(13) | 4457(2) | 921(1)   | 4452(1) | 14(1) |
| C(14) | 5490(2) | 1786(2)  | 4779(1) | 20(1) |
| C(15) | 3433(2) | -477(1)  | 4626(1) | 15(1) |
| C(16) | 2881(2) | -2118(2) | 5318(1) | 19(1) |

---

**Table 3. Bond lengths [Å] and angles [°] for C<sub>16</sub>H<sub>17</sub>BrO<sub>3</sub>.**

---

|            |            |
|------------|------------|
| Br(1)-C(1) | 1.8983(12) |
| O(1)-C(8)  | 1.3761(15) |
| O(1)-C(12) | 1.4372(16) |

|              |            |
|--------------|------------|
| O(2)-C(15)   | 1.2079(16) |
| O(3)-C(15)   | 1.3404(14) |
| O(3)-C(16)   | 1.4428(16) |
| C(1)-C(2)    | 1.3806(17) |
| C(1)-C(6)    | 1.3905(17) |
| C(2)-C(3)    | 1.3925(17) |
| C(2)-H(2)    | 0.9500     |
| C(3)-C(4)    | 1.3955(17) |
| C(3)-H(3)    | 0.9500     |
| C(4)-C(5)    | 1.3930(16) |
| C(4)-C(7)    | 1.5256(18) |
| C(5)-C(6)    | 1.3877(17) |
| C(5)-H(5)    | 0.9500     |
| C(6)-H(6)    | 0.9500     |
| C(7)-C(8)    | 1.5094(18) |
| C(7)-C(13)   | 1.5228(17) |
| C(7)-H(7)    | 0.993(13)  |
| C(8)-C(9)    | 1.3327(18) |
| C(9)-C(10)   | 1.4976(19) |
| C(9)-H(9)    | 0.937(13)  |
| C(10)-C(11)  | 1.525(2)   |
| C(10)-H(10A) | 0.9900     |
| C(10)-H(10B) | 0.9900     |
| C(11)-C(12)  | 1.511(2)   |
| C(11)-H(11A) | 0.9900     |
| C(11)-H(11B) | 0.9900     |
| C(12)-H(12A) | 0.9900     |
| C(12)-H(12B) | 0.9900     |

|                  |            |
|------------------|------------|
| C(13)-C(14)      | 1.3235(18) |
| C(13)-C(15)      | 1.4918(17) |
| C(14)-H(14A)     | 0.962(13)  |
| C(14)-H(14B)     | 0.971(13)  |
| C(16)-H(16A)     | 0.9800     |
| C(16)-H(16B)     | 0.9800     |
| C(16)-H(16C)     | 0.9800     |
|                  |            |
| C(8)-O(1)-C(12)  | 113.41(11) |
| C(15)-O(3)-C(16) | 116.28(10) |
| C(2)-C(1)-C(6)   | 121.51(12) |
| C(2)-C(1)-Br(1)  | 119.31(9)  |
| C(6)-C(1)-Br(1)  | 119.18(9)  |
| C(1)-C(2)-C(3)   | 118.99(11) |
| C(1)-C(2)-H(2)   | 120.5      |
| C(3)-C(2)-H(2)   | 120.5      |
| C(2)-C(3)-C(4)   | 120.97(12) |
| C(2)-C(3)-H(3)   | 119.5      |
| C(4)-C(3)-H(3)   | 119.5      |
| C(5)-C(4)-C(3)   | 118.51(12) |
| C(5)-C(4)-C(7)   | 119.39(11) |
| C(3)-C(4)-C(7)   | 122.10(11) |
| C(6)-C(5)-C(4)   | 121.40(12) |
| C(6)-C(5)-H(5)   | 119.3      |
| C(4)-C(5)-H(5)   | 119.3      |
| C(5)-C(6)-C(1)   | 118.62(11) |
| C(5)-C(6)-H(6)   | 120.7      |
| C(1)-C(6)-H(6)   | 120.7      |

|                     |            |
|---------------------|------------|
| C(8)-C(7)-C(13)     | 110.84(10) |
| C(8)-C(7)-C(4)      | 112.84(10) |
| C(13)-C(7)-C(4)     | 112.55(10) |
| C(8)-C(7)-H(7)      | 103.9(9)   |
| C(13)-C(7)-H(7)     | 106.5(9)   |
| C(4)-C(7)-H(7)      | 109.6(9)   |
| C(9)-C(8)-O(1)      | 124.29(12) |
| C(9)-C(8)-C(7)      | 126.52(12) |
| O(1)-C(8)-C(7)      | 109.14(10) |
| C(8)-C(9)-C(10)     | 122.96(13) |
| C(8)-C(9)-H(9)      | 118.5(10)  |
| C(10)-C(9)-H(9)     | 118.5(10)  |
| C(9)-C(10)-C(11)    | 110.39(12) |
| C(9)-C(10)-H(10A)   | 109.6      |
| C(11)-C(10)-H(10A)  | 109.6      |
| C(9)-C(10)-H(10B)   | 109.6      |
| C(11)-C(10)-H(10B)  | 109.6      |
| H(10A)-C(10)-H(10B) | 108.1      |
| C(12)-C(11)-C(10)   | 109.96(12) |
| C(12)-C(11)-H(11A)  | 109.7      |
| C(10)-C(11)-H(11A)  | 109.7      |
| C(12)-C(11)-H(11B)  | 109.7      |
| C(10)-C(11)-H(11B)  | 109.7      |
| H(11A)-C(11)-H(11B) | 108.2      |
| O(1)-C(12)-C(11)    | 112.07(12) |
| O(1)-C(12)-H(12A)   | 109.2      |
| C(11)-C(12)-H(12A)  | 109.2      |
| O(1)-C(12)-H(12B)   | 109.2      |



|                     |            |
|---------------------|------------|
| C(11)-C(12)-H(12B)  | 109.2      |
| H(12A)-C(12)-H(12B) | 107.9      |
| C(14)-C(13)-C(15)   | 121.16(11) |
| C(14)-C(13)-C(7)    | 124.62(12) |
| C(15)-C(13)-C(7)    | 114.22(10) |
| C(13)-C(14)-H(14A)  | 119.9(10)  |
| C(13)-C(14)-H(14B)  | 123.3(10)  |
| H(14A)-C(14)-H(14B) | 116.7(14)  |
| O(2)-C(15)-O(3)     | 123.34(12) |
| O(2)-C(15)-C(13)    | 123.58(11) |
| O(3)-C(15)-C(13)    | 113.08(11) |
| O(3)-C(16)-H(16A)   | 109.5      |
| O(3)-C(16)-H(16B)   | 109.5      |
| H(16A)-C(16)-H(16B) | 109.5      |
| O(3)-C(16)-H(16C)   | 109.5      |
| H(16A)-C(16)-H(16C) | 109.5      |
| H(16B)-C(16)-H(16C) | 109.5      |

---

Symmetry transformations used to generate equivalent atoms:

**Table 4. Anisotropic displacement parameters ( $\text{\AA}^2 \times 10^3$ ) for  $\text{C}_{16}\text{H}_{17}\text{BrO}_3$ . The anisotropic displacement factor exponent takes the form:  $-2\pi^2[h^2 a^{*2}U^{11} + \dots + 2 h k a^* b^* U^{12}]$**

|       | $U^{11}$ | $U^{22}$ | $U^{33}$ | $U^{23}$ | $U^{13}$ | $U^{12}$ |
|-------|----------|----------|----------|----------|----------|----------|
| Br(1) | 19(1)    | 23(1)    | 20(1)    | -5(1)    | 5(1)     | 1(1)     |
| O(1)  | 18(1)    | 14(1)    | 25(1)    | -1(1)    | 3(1)     | 3(1)     |
| O(2)  | 29(1)    | 22(1)    | 18(1)    | 2(1)     | -5(1)    | -9(1)    |

|       |       |       |       |       |       |       |
|-------|-------|-------|-------|-------|-------|-------|
| O(3)  | 26(1) | 16(1) | 14(1) | 3(1)  | -2(1) | -4(1) |
| C(1)  | 18(1) | 12(1) | 16(1) | 0(1)  | 5(1)  | 0(1)  |
| C(2)  | 15(1) | 16(1) | 17(1) | 3(1)  | 0(1)  | 0(1)  |
| C(3)  | 17(1) | 15(1) | 13(1) | 0(1)  | -2(1) | -1(1) |
| C(4)  | 16(1) | 12(1) | 15(1) | 2(1)  | 0(1)  | -1(1) |
| C(5)  | 16(1) | 16(1) | 17(1) | 2(1)  | -2(1) | 0(1)  |
| C(6)  | 20(1) | 17(1) | 12(1) | 0(1)  | -2(1) | -2(1) |
| C(7)  | 14(1) | 13(1) | 13(1) | -1(1) | -1(1) | 0(1)  |
| C(8)  | 17(1) | 14(1) | 13(1) | -1(1) | -1(1) | 2(1)  |
| C(9)  | 20(1) | 15(1) | 17(1) | -1(1) | 3(1)  | 1(1)  |
| C(10) | 29(1) | 18(1) | 20(1) | 0(1)  | 7(1)  | -4(1) |
| C(11) | 36(1) | 14(1) | 26(1) | 2(1)  | 4(1)  | 3(1)  |
| C(12) | 27(1) | 12(1) | 28(1) | -2(1) | 6(1)  | 3(1)  |
| C(13) | 14(1) | 14(1) | 14(1) | 1(1)  | 1(1)  | 1(1)  |
| C(14) | 25(1) | 19(1) | 17(1) | 2(1)  | -2(1) | -4(1) |
| C(15) | 14(1) | 16(1) | 15(1) | 1(1)  | 1(1)  | 2(1)  |
| C(16) | 20(1) | 17(1) | 20(1) | 4(1)  | 2(1)  | -2(1) |

---

**Table 5. Hydrogen coordinates ( $\times 10^4$ ) and isotropic displacement parameters ( $\text{\AA}^2 \times 10^3$ ) for  $\text{C}_{16}\text{H}_{17}\text{BrO}_3$ .**

|        | x        | y        | z       | U(eq) |
|--------|----------|----------|---------|-------|
| H(2)   | 10402    | -1330    | 3491    | 19    |
| H(3)   | 8232     | 130      | 4026    | 18    |
| H(5)   | 3460     | 89       | 2957    | 19    |
| H(6)   | 5594     | -1385    | 2422    | 20    |
| H(7)   | 2640(20) | 1050(17) | 3797(6) | 16    |
| H(9)   | 7470(20) | 2903(17) | 3508(6) | 21    |
| H(10A) | 6918     | 5264     | 3116    | 27    |
| H(10B) | 7439     | 5555     | 3712    | 27    |
| H(11A) | 4352     | 6885     | 3595    | 31    |
| H(11B) | 3300     | 5680     | 3220    | 31    |
| H(12A) | 3859     | 5305     | 4306    | 27    |
| H(12B) | 1578     | 5637     | 4035    | 27    |
| H(14A) | 6200(30) | 2660(16) | 4657(6) | 24    |
| H(14B) | 5680(30) | 1549(18) | 5141(5) | 24    |
| H(16A) | 1369     | -1950    | 5420    | 28    |
| H(16B) | 3718     | -2447    | 5618    | 28    |
| H(16C) | 2935     | -2871    | 5049    | 28    |

**Table 6. Torsion angles [°] for C<sub>16</sub>H<sub>17</sub>BrO<sub>3</sub>.**

---

|                        |             |
|------------------------|-------------|
| C(6)-C(1)-C(2)-C(3)    | -0.76(19)   |
| Br(1)-C(1)-C(2)-C(3)   | 179.44(9)   |
| C(1)-C(2)-C(3)-C(4)    | 0.05(19)    |
| C(2)-C(3)-C(4)-C(5)    | 0.35(19)    |
| C(2)-C(3)-C(4)-C(7)    | -178.85(12) |
| C(3)-C(4)-C(5)-C(6)    | -0.04(18)   |
| C(7)-C(4)-C(5)-C(6)    | 179.17(11)  |
| C(4)-C(5)-C(6)-C(1)    | -0.64(19)   |
| C(2)-C(1)-C(6)-C(5)    | 1.05(19)    |
| Br(1)-C(1)-C(6)-C(5)   | -179.14(9)  |
| C(5)-C(4)-C(7)-C(8)    | -88.14(13)  |
| C(3)-C(4)-C(7)-C(8)    | 91.04(14)   |
| C(5)-C(4)-C(7)-C(13)   | 145.49(11)  |
| C(3)-C(4)-C(7)-C(13)   | -35.32(16)  |
| C(12)-O(1)-C(8)-C(9)   | -16.48(17)  |
| C(12)-O(1)-C(8)-C(7)   | 161.12(11)  |
| C(13)-C(7)-C(8)-C(9)   | 101.60(14)  |
| C(4)-C(7)-C(8)-C(9)    | -25.67(17)  |
| C(13)-C(7)-C(8)-O(1)   | -75.94(12)  |
| C(4)-C(7)-C(8)-O(1)    | 156.79(10)  |
| O(1)-C(8)-C(9)-C(10)   | -3.6(2)     |
| C(7)-C(8)-C(9)-C(10)   | 179.20(12)  |
| C(8)-C(9)-C(10)-C(11)  | -8.96(19)   |
| C(9)-C(10)-C(11)-C(12) | 38.75(16)   |
| C(8)-O(1)-C(12)-C(11)  | 48.46(15)   |
| C(10)-C(11)-C(12)-O(1) | -60.51(16)  |

|                        |             |
|------------------------|-------------|
| C(8)-C(7)-C(13)-C(14)  | -20.91(17)  |
| C(4)-C(7)-C(13)-C(14)  | 106.52(14)  |
| C(8)-C(7)-C(13)-C(15)  | 158.81(10)  |
| C(4)-C(7)-C(13)-C(15)  | -73.76(13)  |
| C(16)-O(3)-C(15)-O(2)  | 0.64(18)    |
| C(16)-O(3)-C(15)-C(13) | -179.13(10) |
| C(14)-C(13)-C(15)-O(2) | 176.47(13)  |
| C(7)-C(13)-C(15)-O(2)  | -3.27(17)   |
| C(14)-C(13)-C(15)-O(3) | -3.76(17)   |
| C(7)-C(13)-C(15)-O(3)  | 176.50(10)  |

---

Symmetry transformations used to generate equivalent atoms:

---

## References:

- (1) (a) Kacprzynski, M. A.; May T. L.; Kazane, S. A.; Hoveyda, A. H. *Angew. Chem., Int. Ed.* **2007**, *49*, 4554–4558. (b) Lee, Y.; Akiyama, K.; Gillingham, D. G.; Brown, M. K.; Hoveyda, A. H. *J. Am. Chem. Soc.* **2008**, *130*, 446–447. (c) Lee, Y.; Hoveyda, A. H. *J. Am. Chem. Soc.* **2009**, *131*, 11625–11633. (d) Akiyama, K.; Gao, F.; Hoveyda, A. H. *Angew. Chem., Int. Ed.* **2010**, *49*, 419–423. (e) Jung, B.; Hoveyda, A. H. *J. Am. Chem. Soc.* **2012**, *134*, 1490–1493. (f) Dabrowski, J. A.; Haefner, F.; Hoveyda, A. H. *Angew. Chem. Int. Ed.* **2013**, *52*, 7694–7699 and references cited therein.
- (2) Zhao, Y.-J.; Loh, T.-P. *Tetrahedron* **2008**, *64*, 4972–4978.
- (3) (a) Sato, K.; Yoshimura, T.; Shindo, M.; Shishido, K. *J. Org. Chem.* **2001**, *66*, 309–314. (b) Grigorjeva, L.; Jirgenson, A. *Eur. J. Org. Chem.* **2012**, 5307–5316.
- (4) Kiesewetter, E. T.; O'Brien, R. V.; Yu, E. C.; Meek, S. J.; Schrock, R. R.; Hoveyda, A. H. *J. Am. Chem. Soc.* **2013**, *135*, 6026–6029.
- (5) Jang, H.; Zhugralin, A. R.; Lee, Y.; Hoveyda, A. H. *J. Am. Chem. Soc.* **2011**, *133*, 7859–7871.
- (6) Ohmura, T.; Yamamoto, Y.; Miyaura, N. *J. Am. Chem. Soc.* **2000**, *122*, 4990–4991.
- (7) Corberán, R.; Mszar, N. W.; Hoveyda, A. H. *Angew. Chem., Int. Ed.* **2011**, *50*, 7079–7082.
- (8) Vieira, E. M.; Snapper, M. L.; Hoveyda, A. H. *J. Am. Chem. Soc.* **2011**, *133*, 3332–3335.
- (9) Lee, K.-s.; Hoveyda, A. H. *J. Org. Chem.* **2009**, *74*, 4455–4462.
- (10) Martin, D.; Kehrl, S.; d'Augustin, M.; Clavier, H.; Mauduit, M.; Alexakis, A. *J. Am. Chem. Soc.* **2006**, *128*, 8416–8417.
- (11) Brown, M. K.; May, T. L.; Baxter, C. A.; Hoveyda, A. H. *Angew. Chem., Int. Ed.* **2007**, *46*, 1097–1100.
- (12) (a) Sy, L.-K.; Brown, G. D. *Phytochemistry* **2001**, *58*, 1159–1166. (b) Araki, S.; Kambe, S.; Kameda, K.; Hirashita, T. *Synthesis* **2003**, *5*, 751–754.
- (13) (a) Ref 1d. (b) Iida, Y.; Oh, K.-B.; Saito, M.; Matsuoka, H.; Kurata, H.; Natsume, M.; Abe, H. *J. Agric. Food. Chem.* **1999**, *47*, 584–587. (c) Jeong, S.-J.; Higuchi, R.; Ono, M.; Kuwano, M.; Kim, Y.-C.; Miyamoto, T. *Biol. Pharm. Bull.* **2003**, *26*, 1721–1724.
- (14) Huang, C.; Liu, B. *Chem. Commun.* **2010**, *46*, 5280–5282.
- (15) (a) Sakai, T.; Nakagawa, Y.; Iwashita, T.; Naoki, H.; Sakan, T. *Bull. Chem. Soc. Jpn.* **1983**, *56*, 3477–3482. (b) Kawamura, M.; Ogasawara, K. *Tetrahedron Lett.* **1995**, *36*, 3369–3372.

Sample Name: Fg-VI-290-pdt  
 Date Collected: 2013-10-20 13:40  
 Vmr: 1.3-vmr-s400  
 Active: 2013-10-20 13:40  
 Date: Oct 20 2013  
 \$File: DirectC13  
 Title: FIDAPURST1313N  
 FIDAPURST1313N exp  
 sw 6410.3 temp 25.0  
 gain 30  
 Pulse Sequence: 2.500 (P12pul) not used  
 SOHvent: cdc13 32768 hst 0.008  
 Data collected: 499000000 2013 11.000  
 Data: 4 alfa 10.000  
 DI 1.000 FLAGS n  
 nt 40 t1 n  
 ct 16 tn n  
 TRANSMITTER H1 hs y  
 tn 399.786 dp nm  
 srfq 399.8 fn PROCESSING  
 tof 60 not used  
 tpwr 5.500 SP DISPLAY  
 DECOUPLER C13 3209.8  
 dn 0 rfi 3700.8  
 dof 0 rfp 2902.4  
 dm rnm 30.3  
 decwave W40\_HCN5mm tp PLOT  
 dpwr 35 WC 250  
 dnt 29412 VS 42  
 at th 0  
 ph

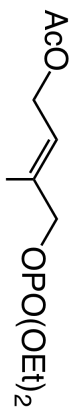

Scheme 4

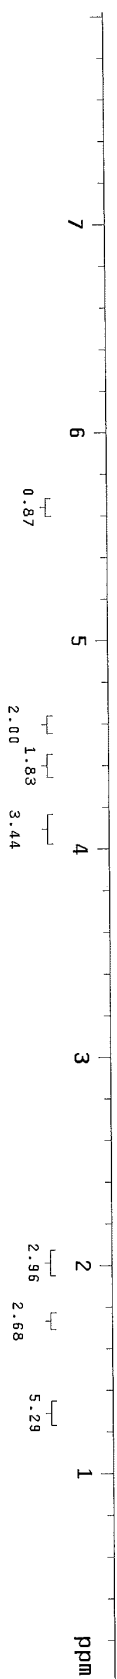

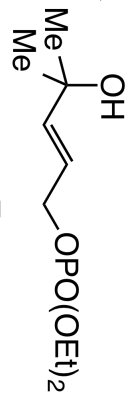

Sample Name: Fg-VIII-040-pdt  
 Date Collected: 20130928  
 Vmr: 13YMR5400  
 Archived: 1911  
 Date: Oct 20 2013  
 Sample Directory: c13  
 Title: Fg-VIII-040-pdt  
 FID Acquisition: exp  
 SV: 6410.3  
 Gain: 25.0  
 Pulse Sequence: zgpg30 (zgpg30) not used  
 Solvent: cdcl3 32768  
 Data Collected: 400000  
 Decouple: 2013 11.000  
 HS: 10.000  
 d1: 1.000  
 nt: 40  
 ct: 15  
 TRANSMITTER: HI  
 tn: hs  
 stf: 399.786  
 tot: 399.8  
 tpwr: 60  
 pw: 5.500  
 DECOUPLER: C13  
 dn: 0  
 dot: 0  
 dm: nnn  
 decouple: W40\_HCN5mm  
 dpwr: 35  
 dmf: 29412  
 WC: 250  
 SC: 0  
 VS: 51  
 TH: 7  
 AI: ph  
 PRESATURATTON: n  
 satmode: n  
 SPECIAL: n  
 temp: 25.0  
 gain: 30  
 hst: 0.008  
 hst: 11.000  
 P2: 2013 10.000  
 FLAGS: n  
 n: n  
 y: y  
 PROCESSING: nn  
 NOT USED: n  
 DISPLAY: 11.5  
 SP: 3199.7  
 WP: 3700.8  
 RF1: 2902.4  
 RF2: 28.9  
 PLOT: 0  
 WC: 250  
 SC: 0  
 VS: 51  
 TH: 7  
 AI: ph

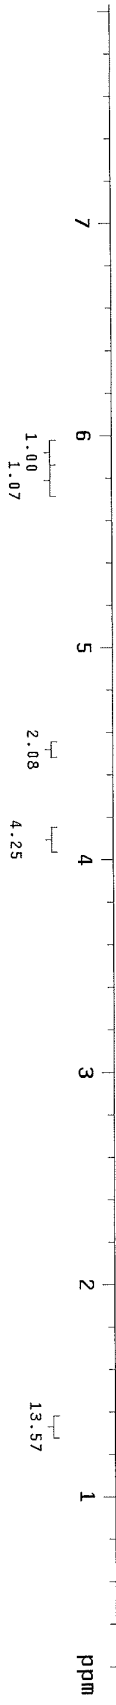





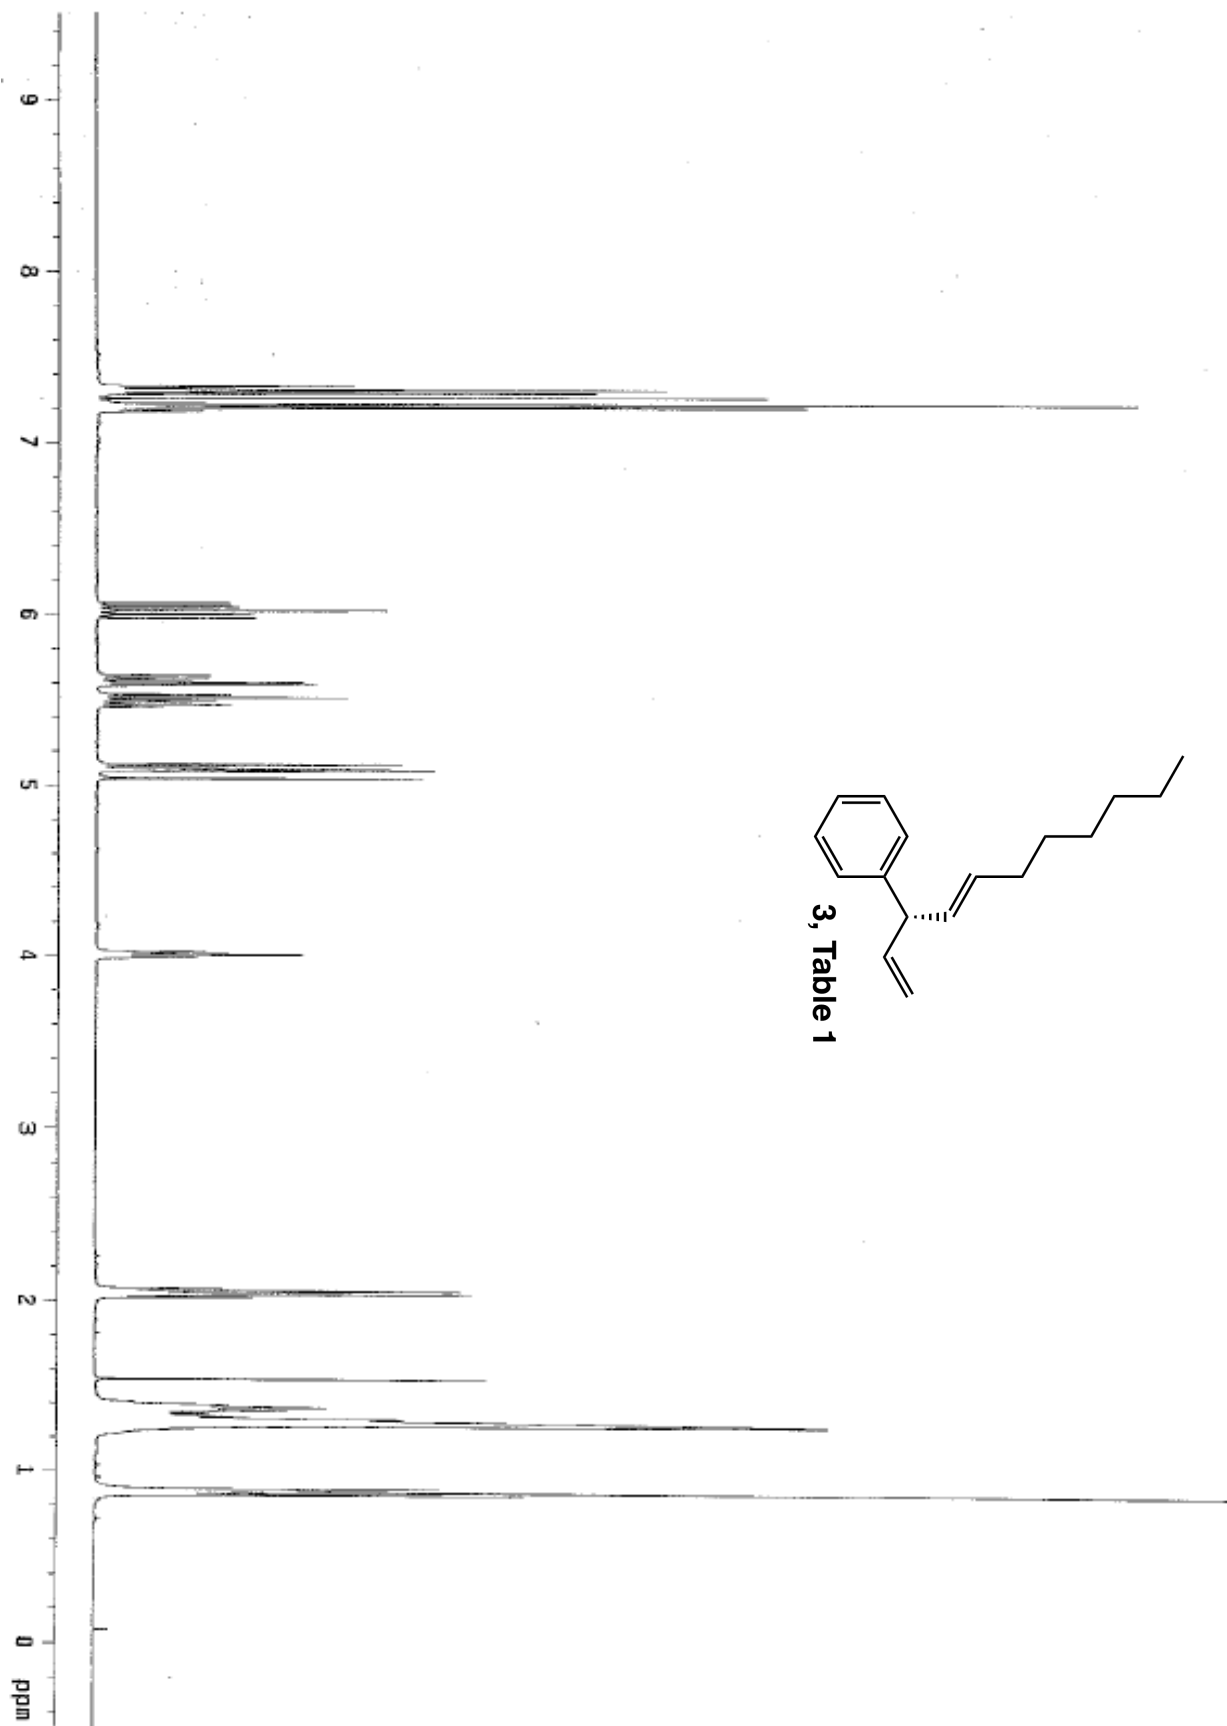

Sample: FG-VII-070-A-pdt1  
 Sample Path: 0120430\_01  
 File: /home/ahn/gaofb/FG-VII-070-A-pdt1\_VII\_070\_01.fid  
 Software: spect 2004r1 temp  
 SO: not used  
 file: /home/ahn/gaofb/FG-VII-070-A-pdt1\_VII\_070\_01.fid  
 t1: VII\_070\_01.fid  
 ACQUISITION  
 sw 6410.3  
 at 2.049  
 np 26264  
 fb 4000  
 bs 32  
 ss 2  
 di 1.000  
 nt 8  
 ct 8  
 tn 8  
 stfrq H1  
 tof 399.786  
 tpwr 399.8  
 pw 60  
 DECOUPLER 5.500  
 dn C13  
 dof 0  
 dm vs  
 dmm nn  
 dpwr th  
 dmf C  
 29412  
 SPECIAL 25.0  
 not used  
 spin 80  
 hst 0.008  
 pw90 11.000  
 atfa 15.000  
 FLAGS  
 n n  
 y y  
 mh mh  
 PROCESSING  
 65536  
 DISPLAY  
 -200.0  
 3997.8  
 3702.0  
 2902.4  
 178.8  
 0  
 250  
 0  
 400  
 20  
 ph

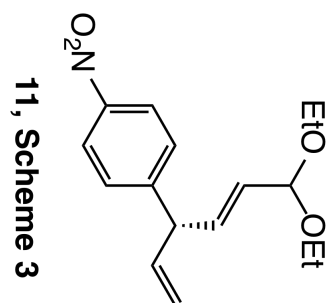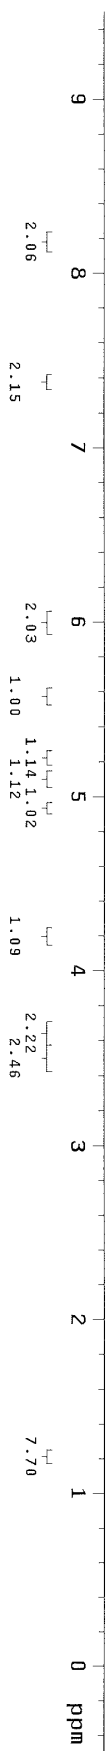

Sample: FG-VII-070-B-pdt2  
 F-Expt1 exp1oton

|                       |            |          |
|-----------------------|------------|----------|
| Pulse Sequence: s2pul | SPECIAL    | 25.0     |
| date: Apr 30 2012     | temp       | not used |
| solvent: cdc13        | gain       | 20       |
| file: exp             | spin       | 0.008    |
| ACQUISITION           | hst        | 11.000   |
| sw: 6410.3            | pw90       | 10.000   |
| at: 2.049             | alpha      |          |
| np: 26264             | FLAGS      | n n n    |
| fb: 4000              | i1         | n        |
| bs: 4                 | in         | y        |
| ss: 2                 | dp         | nn       |
| di: 1.000             | hs         |          |
| nt: 40                | fn         | 65536    |
| ct: 20                | PROCESSING |          |
| TRANSMITTER           | DISPLAY    |          |
| tn: H1                | SP         | -200.0   |
| sfrq: 399.786         | WP         | 4397.5   |
| tof: 399.8            | rfl        | 3701.8   |
| tpwr: 60              | rfd        | 2902.4   |
| pw: 5.500             | fd         | -175.2   |
| DECOUPLER             | TP         | 0        |
| dh: C13               | WC         | 250      |
| dof: 0                | SC         | 0        |
| dmm: nnn              | VS         | 100      |
| dmm: 35               | TH         | 12       |
| dpwr: 29412           | AI         |          |
| dmt: 29412            | AI         |          |
|                       | PH         |          |

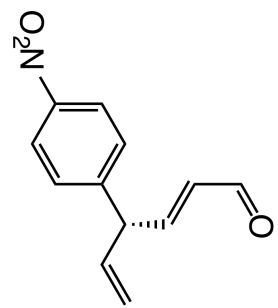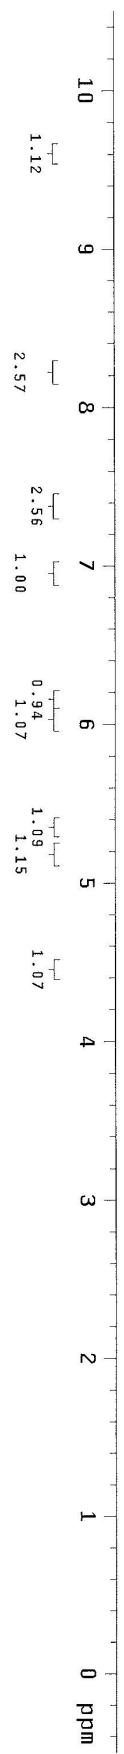

Sample: FG-VII-067-A-pdt2  
 SampleID: 624126.02  
 File: /home/ahn/soft/fg-vii-067-A-pdt2\_VII\_057\_01.fid  
 PULPROG: zgpg30  
 SAMPLE: 62412  
 SCHEDULE: 25.10  
 SOLVENT: CDCl3  
 INSTRUM: spect  
 FID/FC: VII-067-A-pdt2  
 T2: VII\_057\_01.fid  
 PWS0  
 ACQUISITION: aif4  
 SWH: 6410.3  
 F1: 11  
 F2: 11  
 F3: 11  
 F4: 11  
 F5: 11  
 F6: 11  
 F7: 4090  
 DP: 4090  
 BS: 32  
 HS: 32  
 PROCESSING: nm  
 NT: 1.000  
 FN: 95536  
 DISPLAY: 95536  
 CT: 8  
 SP: 8  
 TRANSMITTER: HI  
 MP1: -199.9  
 MP2: 4397.5  
 MP3: 690.0  
 SFG: 399.735  
 LFF: 690.0  
 TOF: 399.8  
 TP: 91.3  
 TPR: 50  
 TP: 91.3  
 PW: DECOUPLER 5.500  
 MC: PLOT  
 CL3: 380  
 DN: 0  
 VS: 400  
 DM: 0  
 MN: 41  
 TH: 1  
 AT: 1  
 PH: 1  
 DMF: 29412

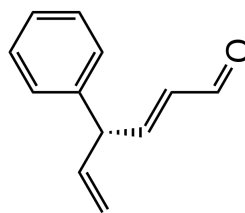

12a, Scheme 3

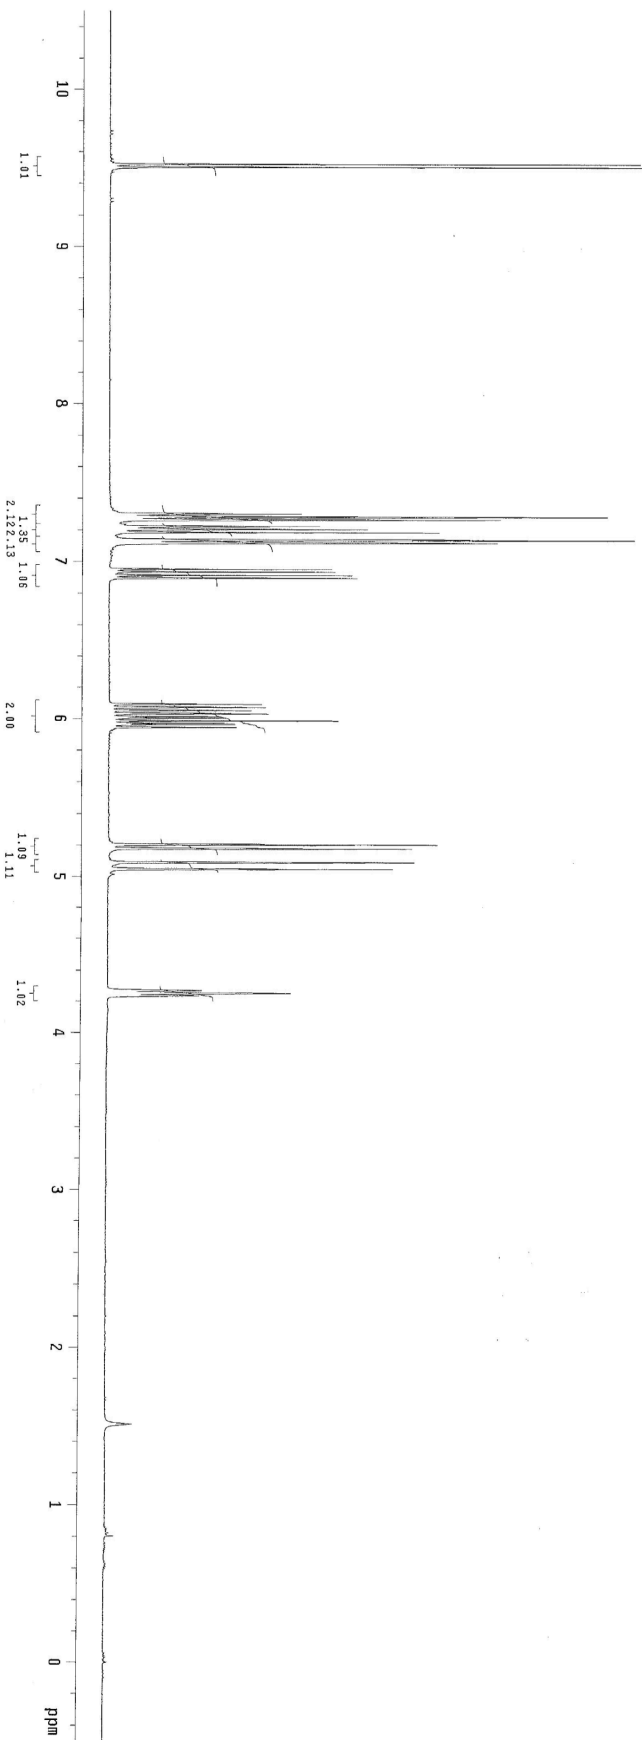

```

Sample: FG-VII-089-B-pdt1
SampleID: FG-VII-089-B-pdt1
Filter: /home/ahh/gao/fg/fg-VII-089-B-pdt1_VI1_089_Q1.fid
PulseProgram: zgpg30
AcquisitionTime: 2.500
Date_Time: 20110427.02
F1: /home/ahh/gao/fg/fg-VII-089-B-pdt1_VI1_089_Q1.fid
F2: /home/ahh/gao/fg/fg-VII-089-B-pdt1_VI1_089_Q1.fid
F3: /home/ahh/gao/fg/fg-VII-089-B-pdt1_VI1_089_Q1.fid
F4: /home/ahh/gao/fg/fg-VII-089-B-pdt1_VI1_089_Q1.fid
F5: /home/ahh/gao/fg/fg-VII-089-B-pdt1_VI1_089_Q1.fid
F6: /home/ahh/gao/fg/fg-VII-089-B-pdt1_VI1_089_Q1.fid
F7: /home/ahh/gao/fg/fg-VII-089-B-pdt1_VI1_089_Q1.fid
F8: /home/ahh/gao/fg/fg-VII-089-B-pdt1_VI1_089_Q1.fid
F9: /home/ahh/gao/fg/fg-VII-089-B-pdt1_VI1_089_Q1.fid
F10: /home/ahh/gao/fg/fg-VII-089-B-pdt1_VI1_089_Q1.fid
SOLVENT: acn
NS: 2
DS: 4
SS: 2
AQ: 1.000
RG: 32768
AF: 65536
SFO: 125.000
WDW: EM
GB: 0
PC: 0
SC: 0
LB: 0
GB1: 0
GB2: 0
GB3: 0
GB4: 0
GB5: 0
GB6: 0
GB7: 0
GB8: 0
GB9: 0
GB10: 0
GB11: 0
GB12: 0
GB13: 0
GB14: 0
GB15: 0
GB16: 0
GB17: 0
GB18: 0
GB19: 0
GB20: 0
DECOUPLER: C13
SC: 0
DC: 0
DD: 0
DM: 0
DPR: 35
DPR2: 35
DPR3: 35
DPR4: 35
DPR5: 35
DPR6: 35
DPR7: 35
DPR8: 35
DPR9: 35
DPR10: 35
DPR11: 35
DPR12: 35
  
```

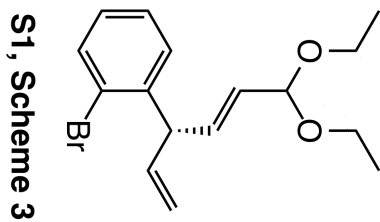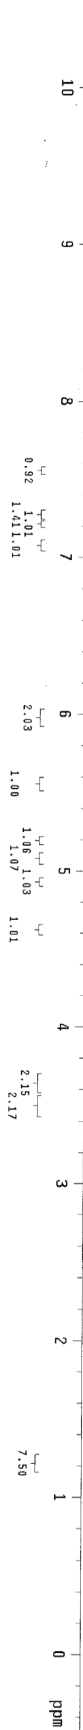

Sample: F1182069-4-pdtz  
 F1182069-4-Proton  
 Pulse Sequence: sspul  
 Date\_Exp: Z 2011  
 Date\_1: 11/11/11  
 File: cdc13  
 Exp: exp  
 Name: not used  
 ACQUISITION  
 SWH: 6410.3  
 FID: 11.000  
 PC: 22254  
 ATTA: 10.000  
 F2: 4000  
 F1: 100  
 BS: 4  
 SS: 2  
 DP: 4  
 DS: 4  
 NS: 1.000  
 PROCESSING: nm  
 CT: 12  
 FN: 65586  
 TRANSMITTER: HI SP  
 DISPLAY: 290.2  
 IN: 399.78  
 ST: 399.78  
 TOF: 399.78  
 TPW: 50  
 FFP: 2992.4  
 PW: 5.500  
 TP: 170.3  
 DECOUPLER: C13  
 WC: 380  
 DOF: 0  
 HM: 396  
 SC: 0  
 DA: 13  
 VS: 396  
 DS: 13  
 VN: 396  
 PH: 299.22  
 AT: 12

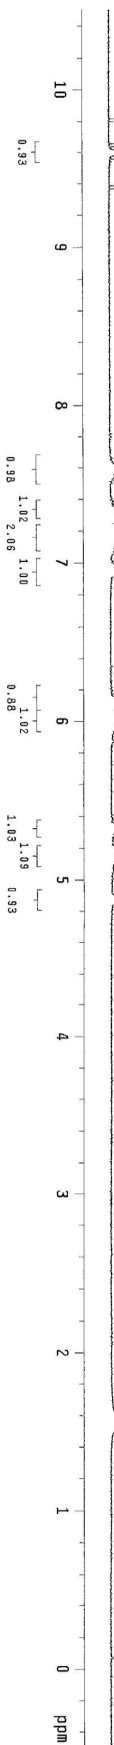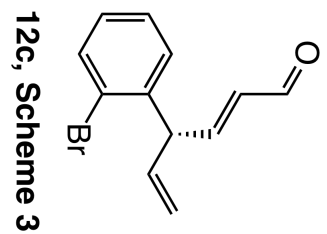

JLC-II-328.F15-16

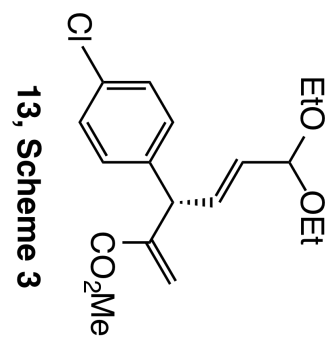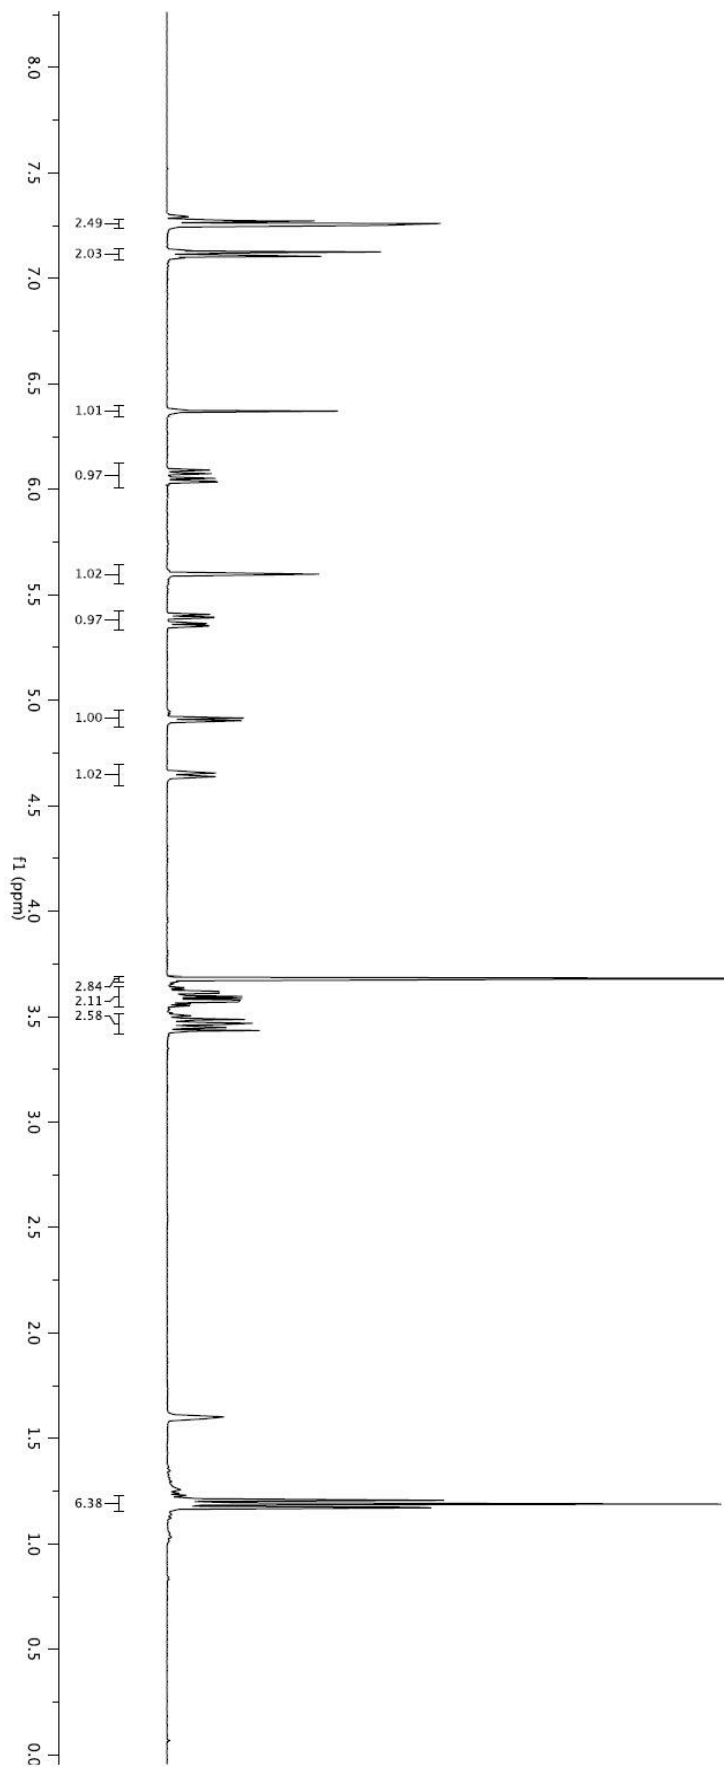

Sample: EG-VII-068-B-hydroproduct  
 Sample: 1P-C63AD129422-7D-VII-068-B-hydroproduct\_VII\_068\_01.f1d  
 File: /home/ahn/gaofd/EG-VII-068-B-hydroproduct\_VII\_068\_01.f1d  
 Name: SAMPLE SPECIAL  
 pulse Sequence: zgpg30 temp 25.0  
 sol vent CDCl3 not used  
 1/e/home/ahn/gaofd/spin 0.068  
 fb/G-VII-068-B-dy~ hst 11.000  
 Product\_VII\_068\_01~ pw90 10.000  
 alfa 10.000  
 ACQUISITION .f1d  
 SW 6410.3 f1 n  
 at 2.049 f1 n  
 np 28264 dp y  
 fb 4000 hs  
 bs 32  
 ss 2  
 dn 1.000 f1  
 nt 8 sp  
 ct 8 wp  
 TRANSMITTER H1 ffl  
 tn 399.786 f1  
 sfreq 399.786 fp  
 tof 399.8 tp  
 tpwr 60  
 pw 5.500 WC  
 DECOUPLER C13 vs  
 dn C13 vs  
 dof 0 th  
 dm nmn at  
 dmm nmn at  
 dpwr C  
 dmf 29412  
 PLOT 250  
 304  
 0  
 ph  
 PROCESSING 55536  
 DISPLAY -199.9  
 3997.8  
 1435.7  
 623.7  
 112.4  
 0

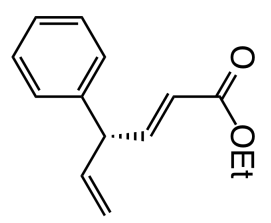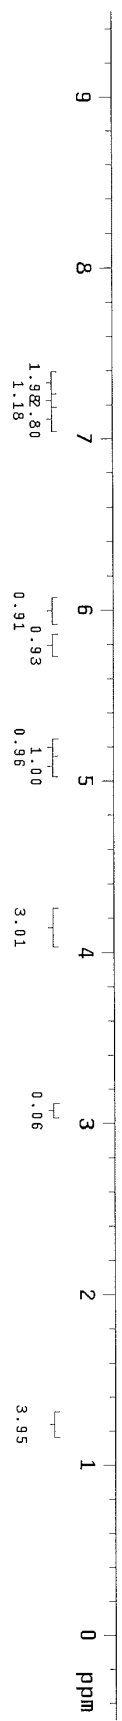







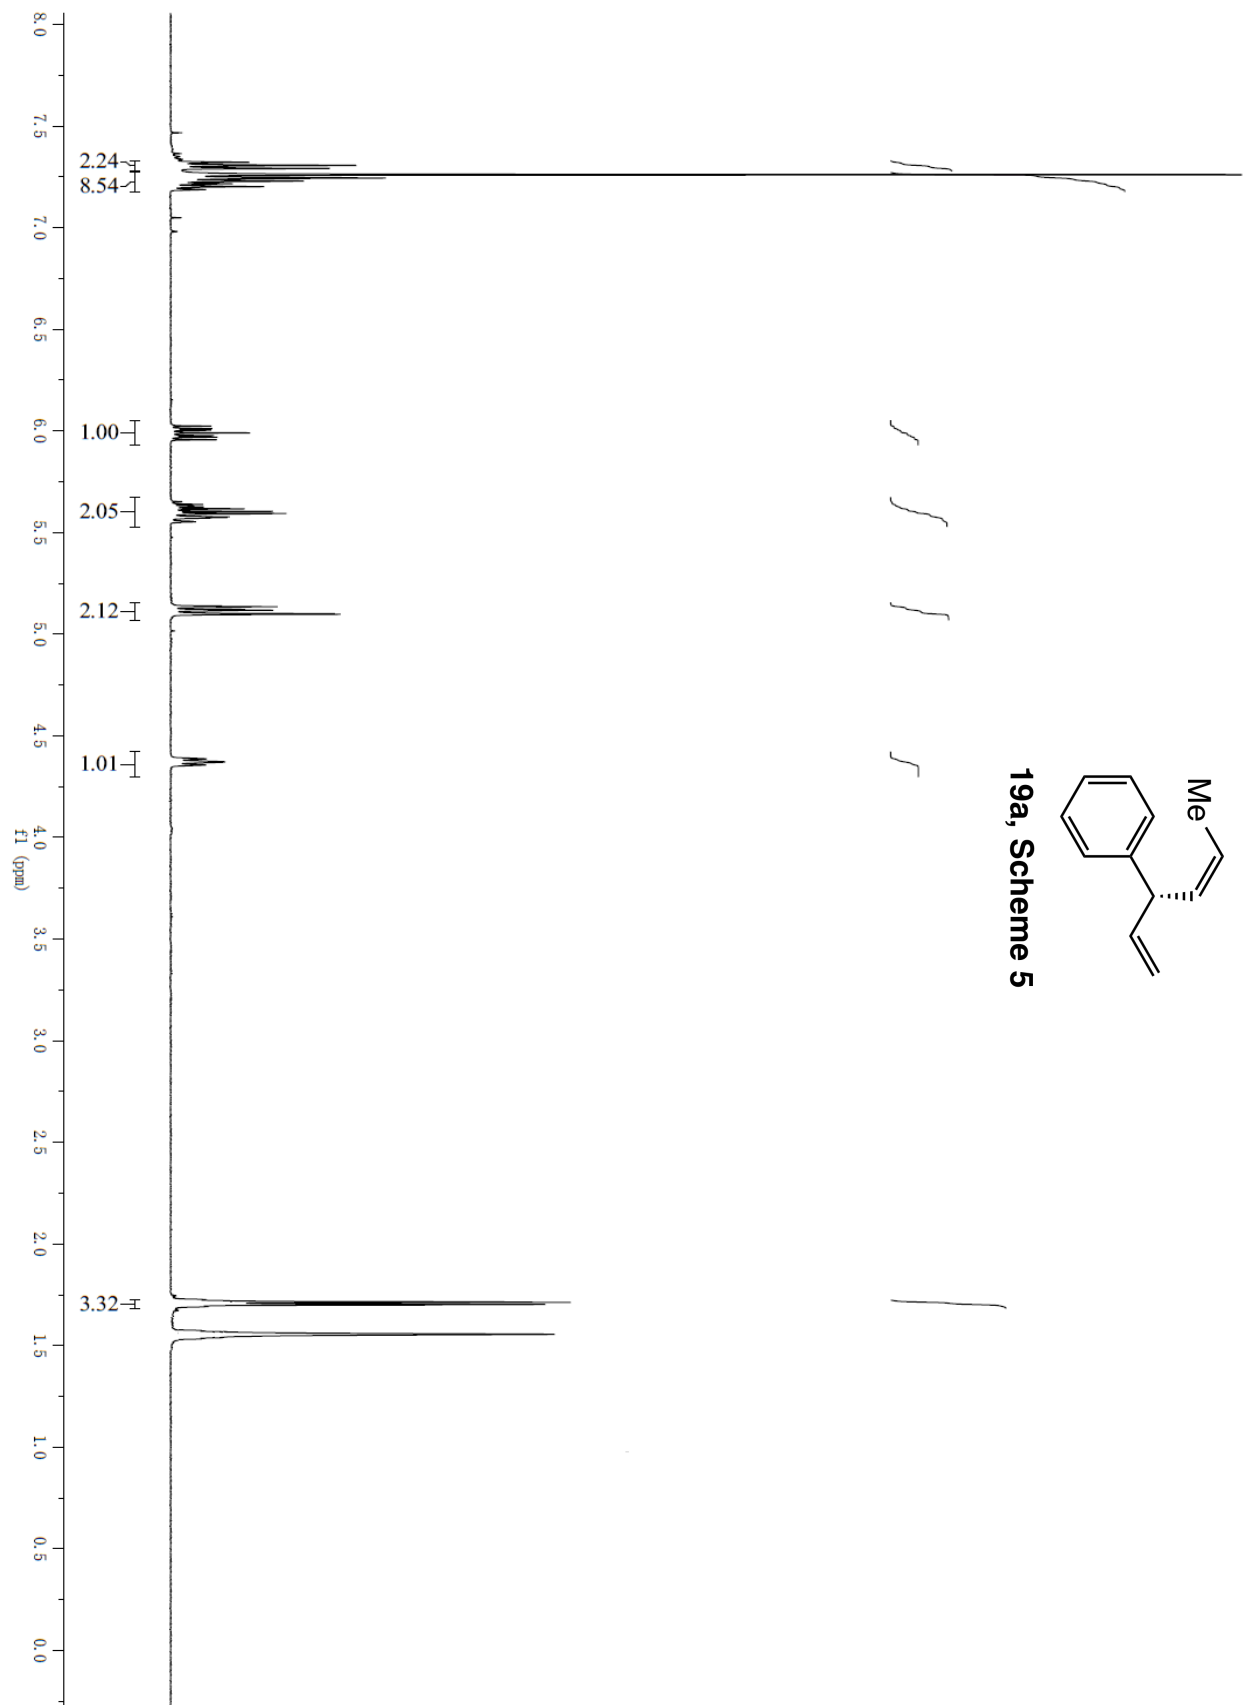

Sample: FG-VII-154-B-pdt  
 Fsk@10ex1p10ton

|                       |            |          |
|-----------------------|------------|----------|
| Pulse Sequence: s2pu1 | SPECIAL    | 25.0     |
| date: Sep 21 2012     | temp       | not used |
| solvent: cdcl3        | gain       | 20       |
| file: exp             | sp1n       | 0.008    |
| ACQUISITION           | hst        | 11.000   |
| sw: 6410.3            | pw90       | 10.000   |
| at: 2.049             | al1a       |          |
| np: 26264             | 11         |          |
| fb: 4000              | 4          |          |
| bs: 4                 | fn         |          |
| ss: 2                 | hs         |          |
| di: 1.000             | 40         |          |
| nt: 40                | fn         |          |
| ct: TRANSMITTER       | 4          |          |
| tn: H1                | sp         |          |
| strq: 399.786         | wp         |          |
| tof: 399.8            | ft1        |          |
| tpwr: 60              | ftp        |          |
| pw: 5.500             | tp         |          |
| DECOUPLER             | 1p         |          |
| dn: C13               | 1p         |          |
| dof: 0                | wc         |          |
| dmm: nmh              | sc         |          |
| dmh: C                | vs         |          |
| dpwr: 35              | th         |          |
| dmf: 29412            | at         |          |
|                       | ph         |          |
|                       | PROCESSING | nm       |
|                       | DISPLAY    | 65536    |
|                       | DISPLAY    | -7.9     |
|                       | wp         | 3240.5   |
|                       | ft1        | 3701.6   |
|                       | ftp        | 2902.4   |
|                       | tp         | 112.8    |
|                       | 1p         | 0        |
|                       | PLOT       |          |
|                       | 250        |          |
|                       | 0          |          |
|                       | 174        |          |
|                       | 12         |          |

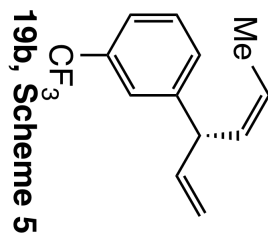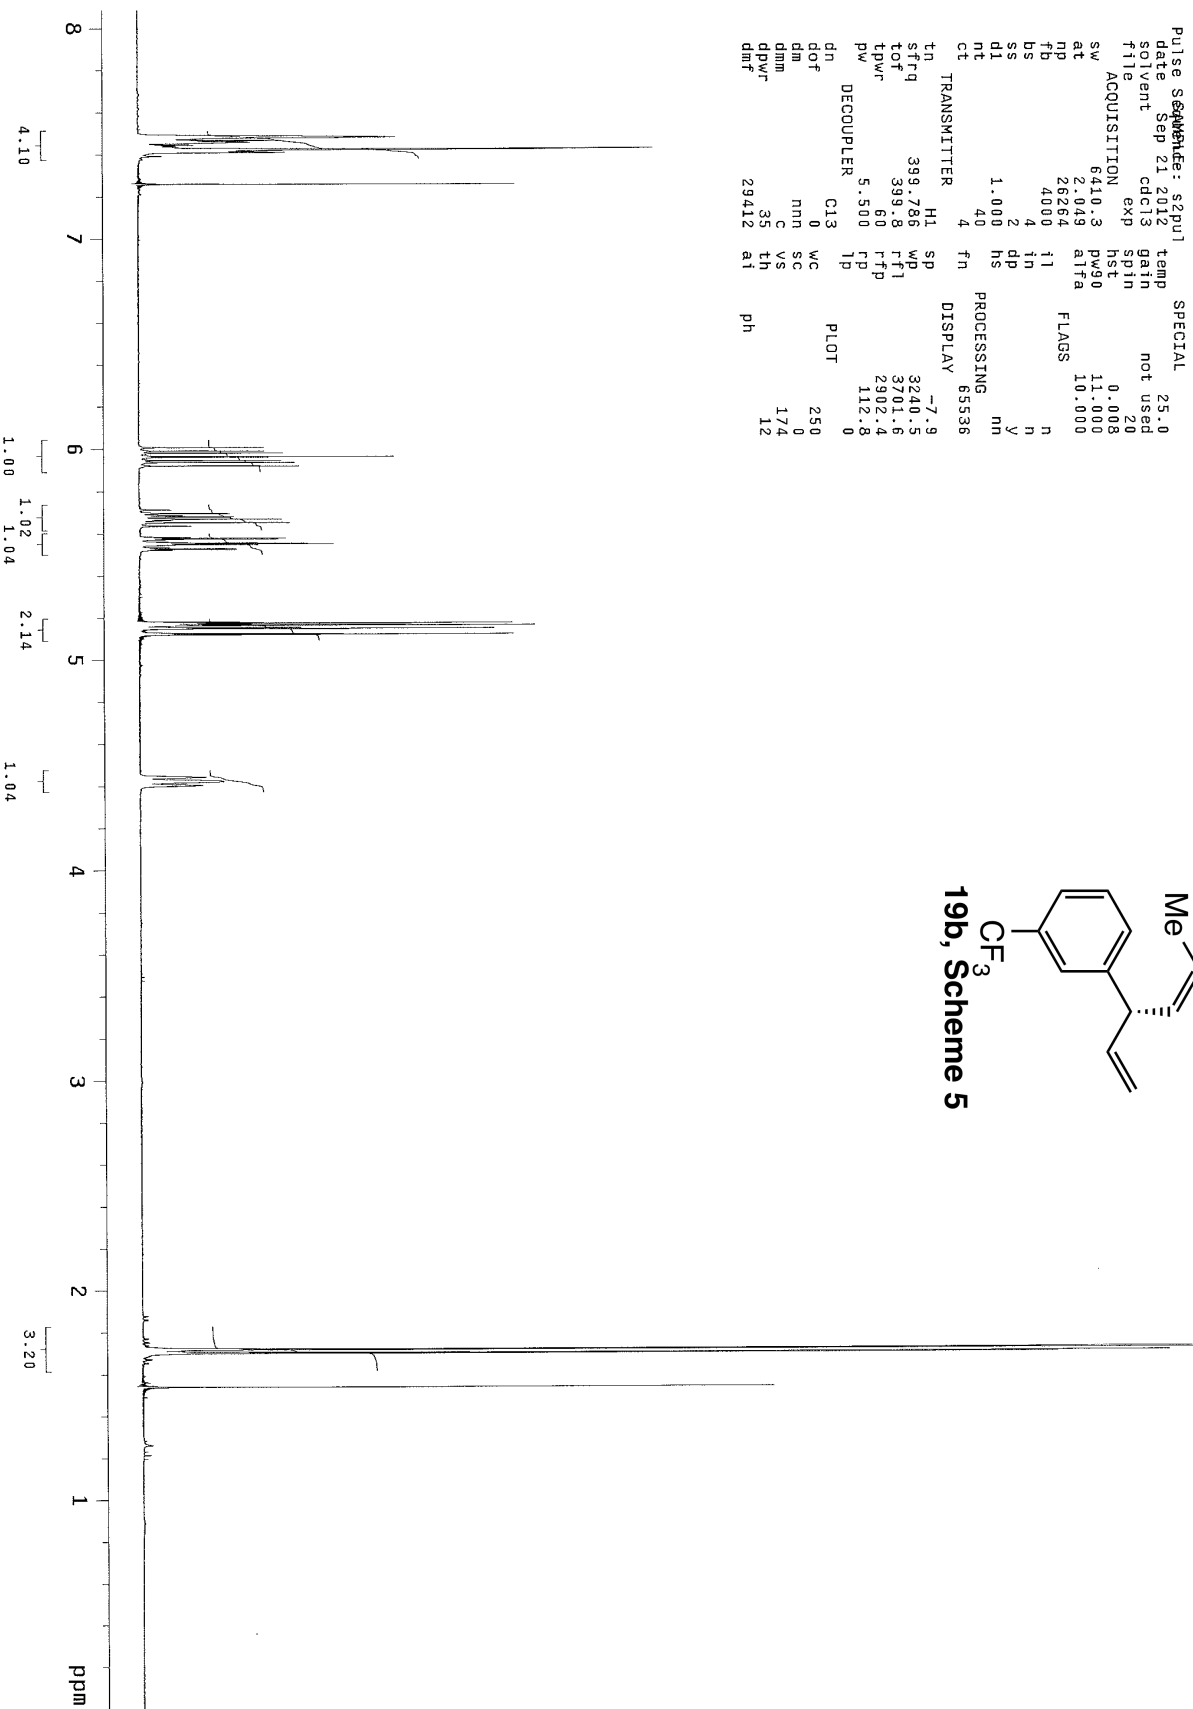

Sample: FG-VII-155-B-pdt  
 Fkqdt expoton

|                       |             |          |
|-----------------------|-------------|----------|
| Pulse Sequence: s2pu1 | SPECIAL     | 25.0     |
| date Sep 21 2012      | temp        | not used |
| solvent cdcl3         | gain        | 20       |
| file exp              | hst         | 0.008    |
| ACQUISITION           | pw90        | 8.900    |
| sw 8012.8             | alfa        | 10.000   |
| at 2.049              | tl          | n        |
| np 32830              | fb          | n        |
| bs 4000               | in          | y        |
| ss 2                  | dp          | nh       |
| d1 1.000              | hs          | nh       |
| nt 40                 | fn          | 55536    |
| ct                    | TRANSMITTER | DISPLAY  |
| tn H1                 | SP          | 1.3      |
| sfrq 499.884          | WD          | 3998.1   |
| tof 499.8             | rfl         | 4635.6   |
| tpwr 59               | rfl         | 3629.1   |
| pw 4.450              | rp          | 159.5    |
| DECOUPLER             | lp          | 0        |
| dh C13                | PLOT        | 250      |
| dof 0                 | WC          | 0        |
| dm nm                 | SC          | 0        |
| dmm C                 | VS          | 136      |
| dpwr th               | PH          | 12       |
| dmf ai                |             |          |

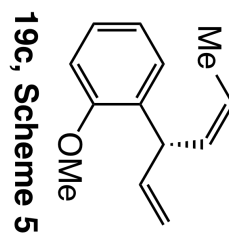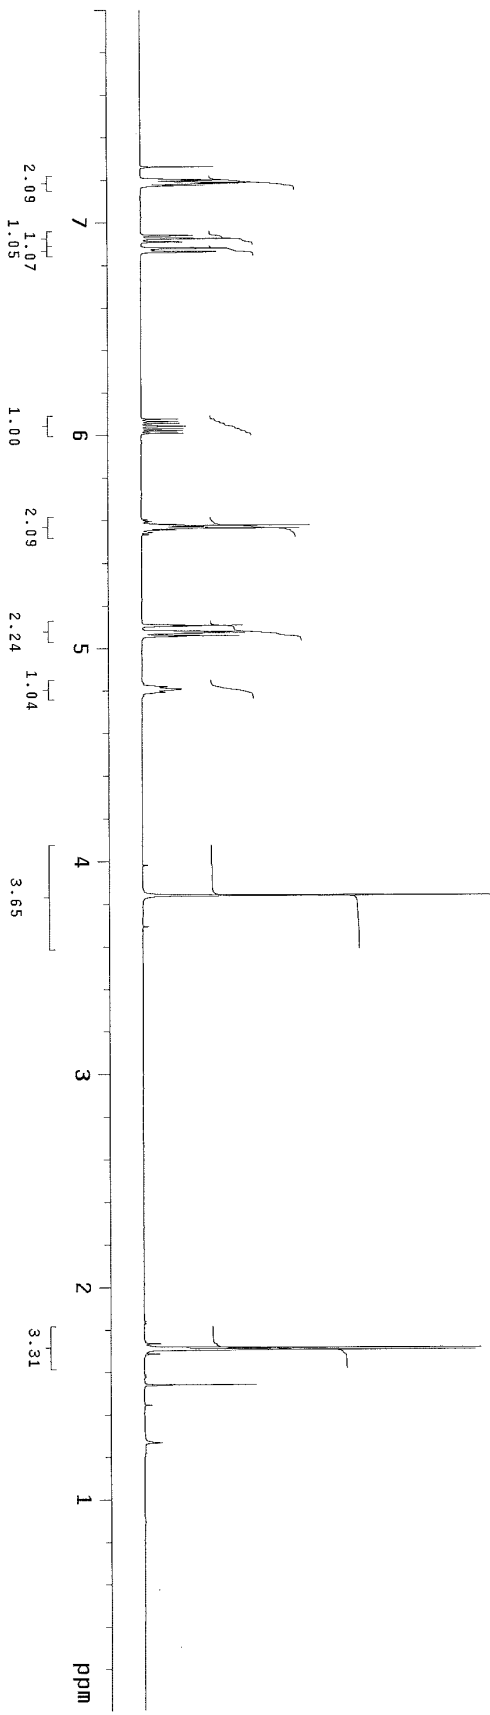

Sample: FG-VII-156-B-pdt  
 F199d1 exp10ton

|                       |         |          |
|-----------------------|---------|----------|
| Pulse Sequence: s2pu1 | SPECIAL | 25.0     |
| date: Sep 21 2012     | temp    | not used |
| solvent: cdcl3        | gain    | 20       |
| file: exp             | sp1n    | 0.008    |
| ACQUISITION: sw       | hst     | 8.900    |
| 8012.8                | pw90    | 10.000   |
| 2.049                 | atfa    |          |
| 32830                 | FLAGS   | n        |
| 4000                  | i1      | n        |
| 4                     | in      | y        |
| 2                     | dp      | y        |
| 1.000                 | hs      | nn       |
| 40                    | fn      | 55536    |
| 8                     | ct      |          |
| TRANSMITTER           | H1      | SP       |
| 499.884               | wp      | 22.5     |
| 499.8                 | rf1     | 3961.2   |
| 59                    | rfp     | 4635.6   |
| 4.450                 | rfp     | 3629.1   |
|                       | rfp     | -175.3   |
| DECOUPLER             | 1p      | 0        |
| C13                   | PL0T    |          |
| 0                     | wc      | 250      |
| nnn                   | sc      | 0        |
| c                     | vs      | 191      |
| th                    | ph      | 12       |
| 32258                 | at      |          |

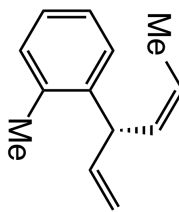

19d, Scheme 5

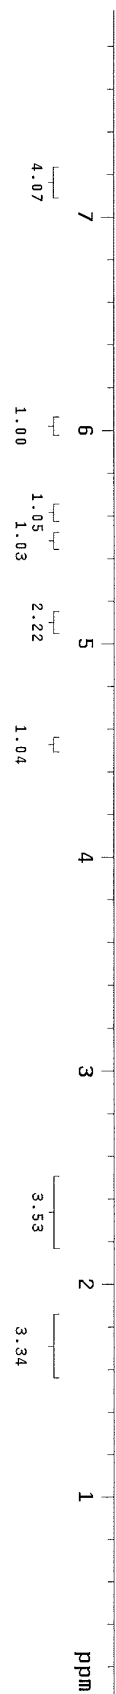

Sample: FG-VII-220-B-pdt  
F1kq15ex1Proton

|                       |            |          |
|-----------------------|------------|----------|
| Pulse Sequence: s2pu1 | SPECIAL    | 25.0     |
| date Dec 12 2012      | temp       |          |
| solvent cdcl3         | gain       | not used |
| file exp              | sp1n       | 20       |
| ACQUISITION           | hst        | 0.008    |
| sw 6410.3             | pw90       | 11.000   |
| at 2.049              | alfa       | 10.000   |
| np 25264              | FLAGS      |          |
| fb 4000               | 11         | n        |
| bs 4                  | in         | n        |
| ss 2                  | dp         | v        |
| di 1.000              | hs         | mn       |
| nt 40                 | PROCESsing |          |
| ct 16                 | fn         | 65536    |
| TRANSMITTER           | DISPLeY    |          |
| tn H1                 | sp         | 188.9    |
| sfrq 399.786          | wd         | 3020.1   |
| tof 899.8             | rf1        | 3701.6   |
| tpwr 5.500            | rfp        | 2902.4   |
| DW 5.500              | fp         | 115.6    |
| DECOUPLER             | 1p         | 0        |
| dh C13                | wc         | 250      |
| dof 0                 | sc         | 0        |
| dm mn                 | sc         | 203      |
| dmm c                 | tn         | 12       |
| dpmr 35               | ph         |          |
| dmt 29412             | at         |          |

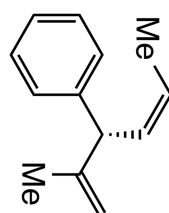

20a, Scheme 5

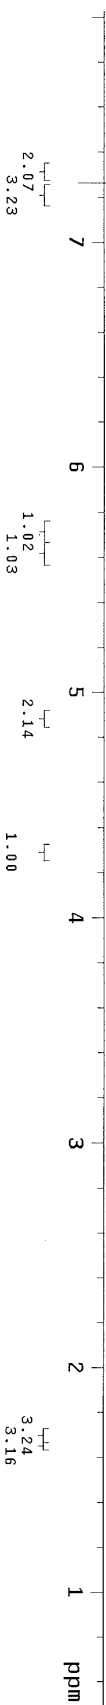

FC-7-243-B.1.fid  
1H starting parameters (zg30)  
DRX-500 TRIC  
061212 CCC

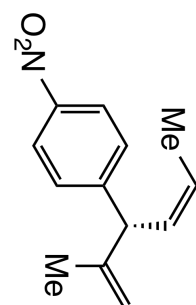

**20b, Scheme 5**

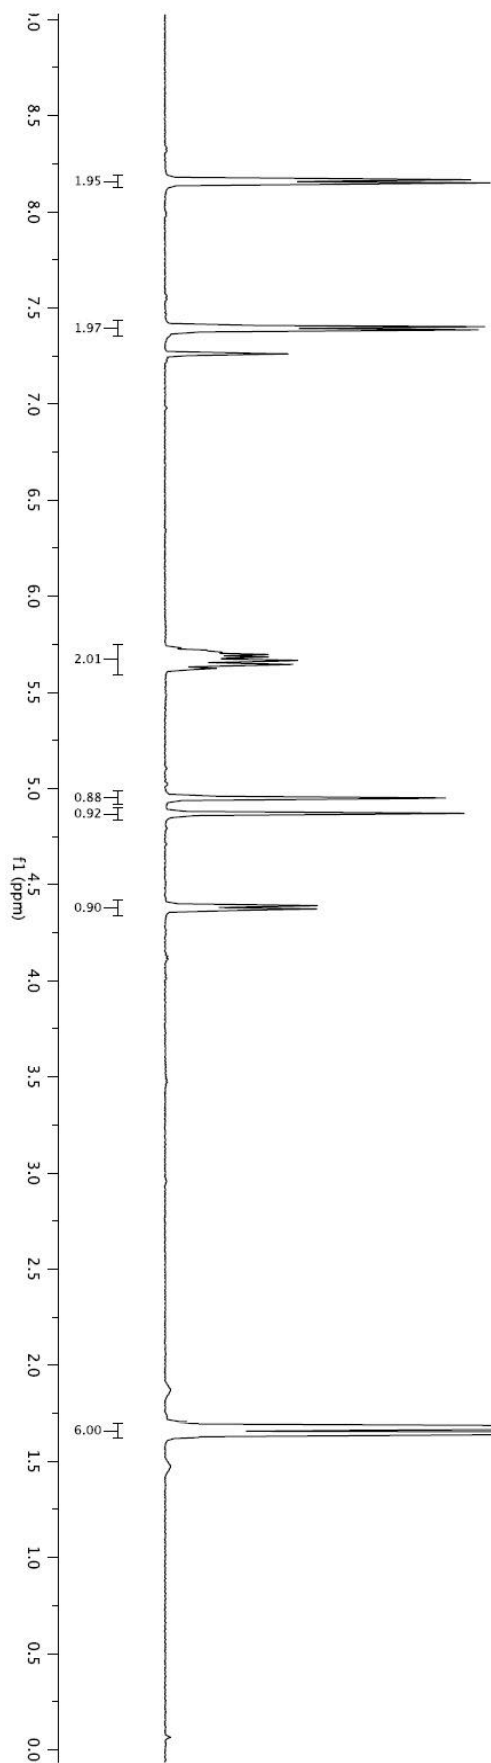



FG-7-244-B.1.fid  
 1H starting parameters (zg30)  
 DRX-500 TRIC  
 061212 CCC

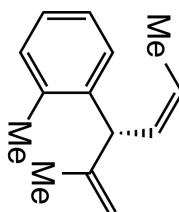

**20c, Scheme 5**

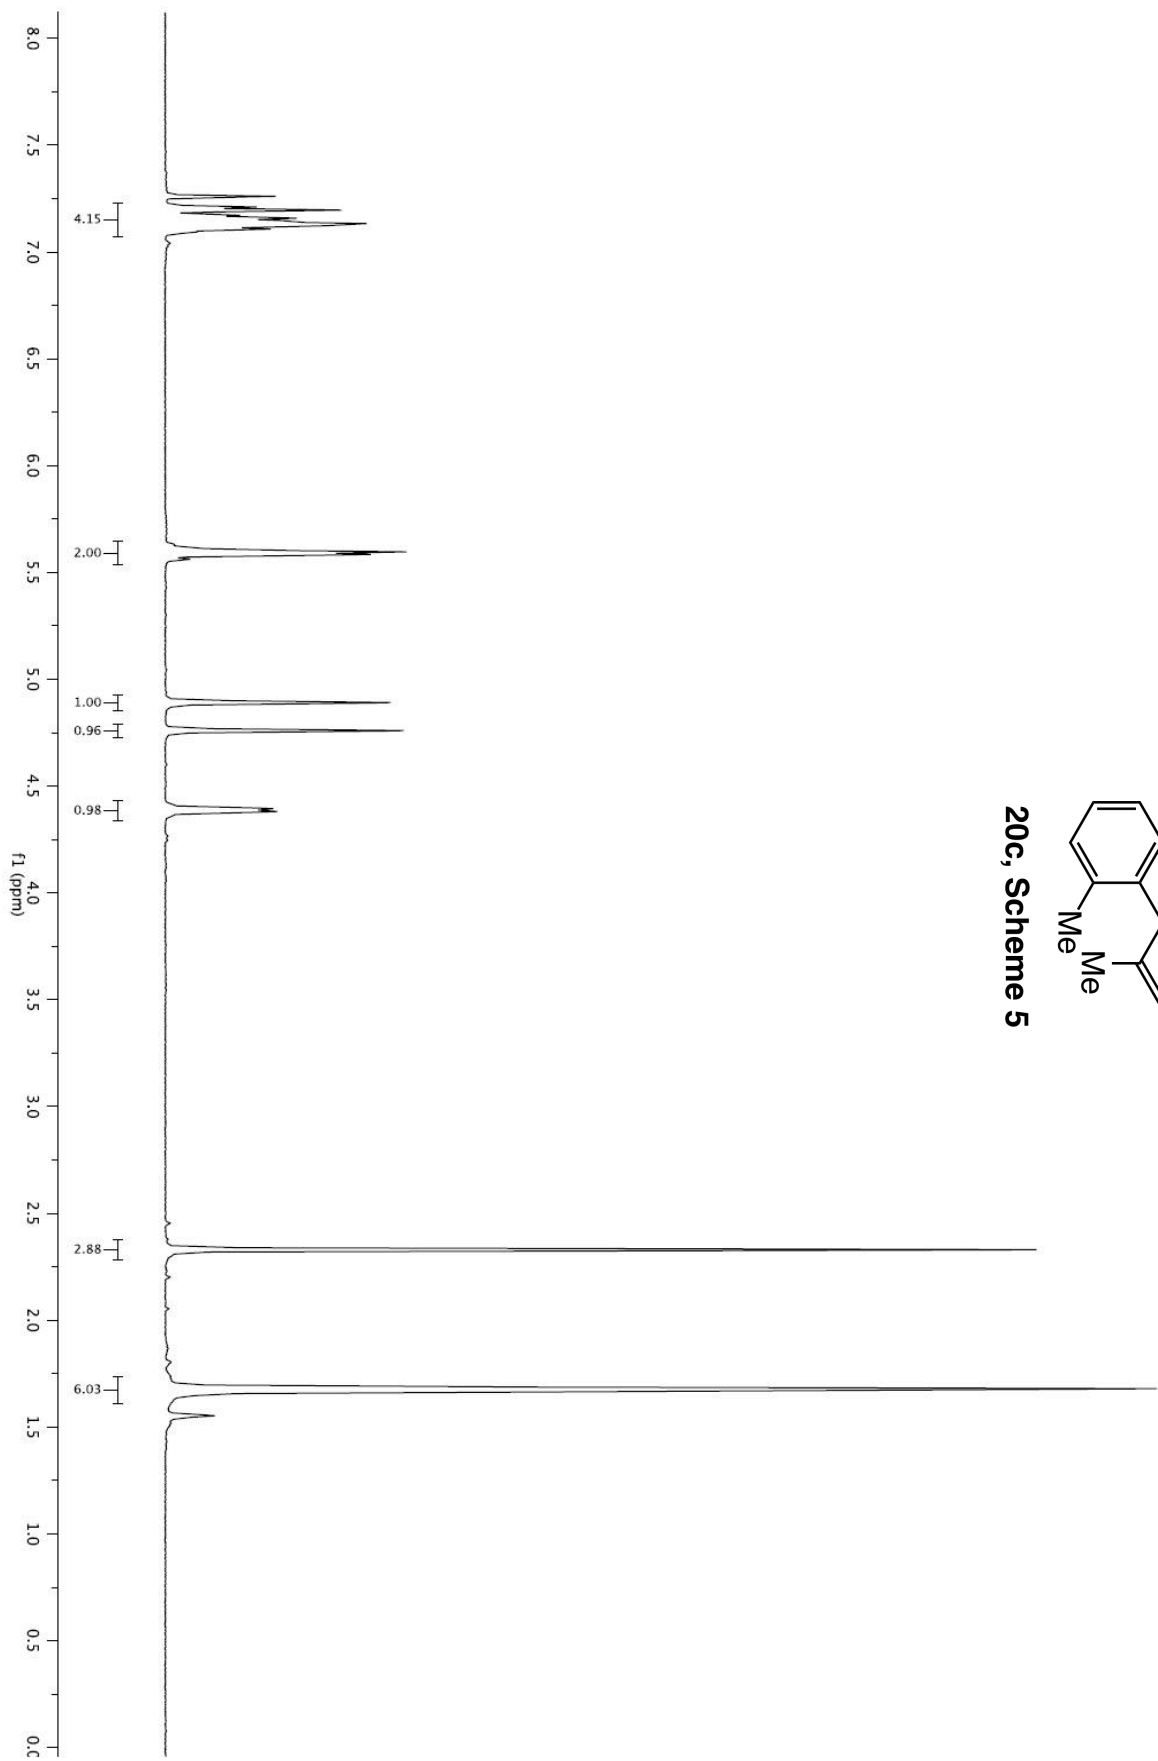

Sample: FG-VII-21a-A-pdt  
 F1k019exp1Proton

|                        |            |          |
|------------------------|------------|----------|
| Pulse Sequence: s2pul1 | SPECIAL    | 25.0     |
| date Dec 12 2012       | temp       | not used |
| solvent cdcl3          | gain       | 20       |
| file exp               | spin       | 0.008    |
| ACQUISITION            | hst        | 11.000   |
| sw 6410.3              | pw90       | 10.000   |
| at 2.049               | ai1a       | 0.000    |
| fb 26254               | FLAGS      | n        |
| np 4000                | fl         | n        |
| bs 4                   | in         | y        |
| ss 2                   | dp         | nh       |
| di 1.000               | hs         | nh       |
| nt 40                  | PROCESSING | 65536    |
| ct 8                   | fn         | DISP     |
| TRANSMITTER            | HI         | SP       |
| tn 399.786             | WD         | 366.5    |
| sfrq 399.8             | rfl        | 2818.6   |
| tof 60                 | rfd        | 3701.8   |
| tpwr 5.500             | fp         | 2902.4   |
| pw                     | lp         | 116.8    |
| DECOUPLER C13          | 1p         | 0        |
| dn                     | WC         | PLOT     |
| dof 0                  | SC         | 250      |
| dm                     | VS         | 0        |
| dmm                    | th         | 87       |
| dpwr                   | ai         | 12       |
| dmf                    | ph         |          |

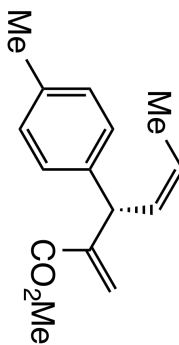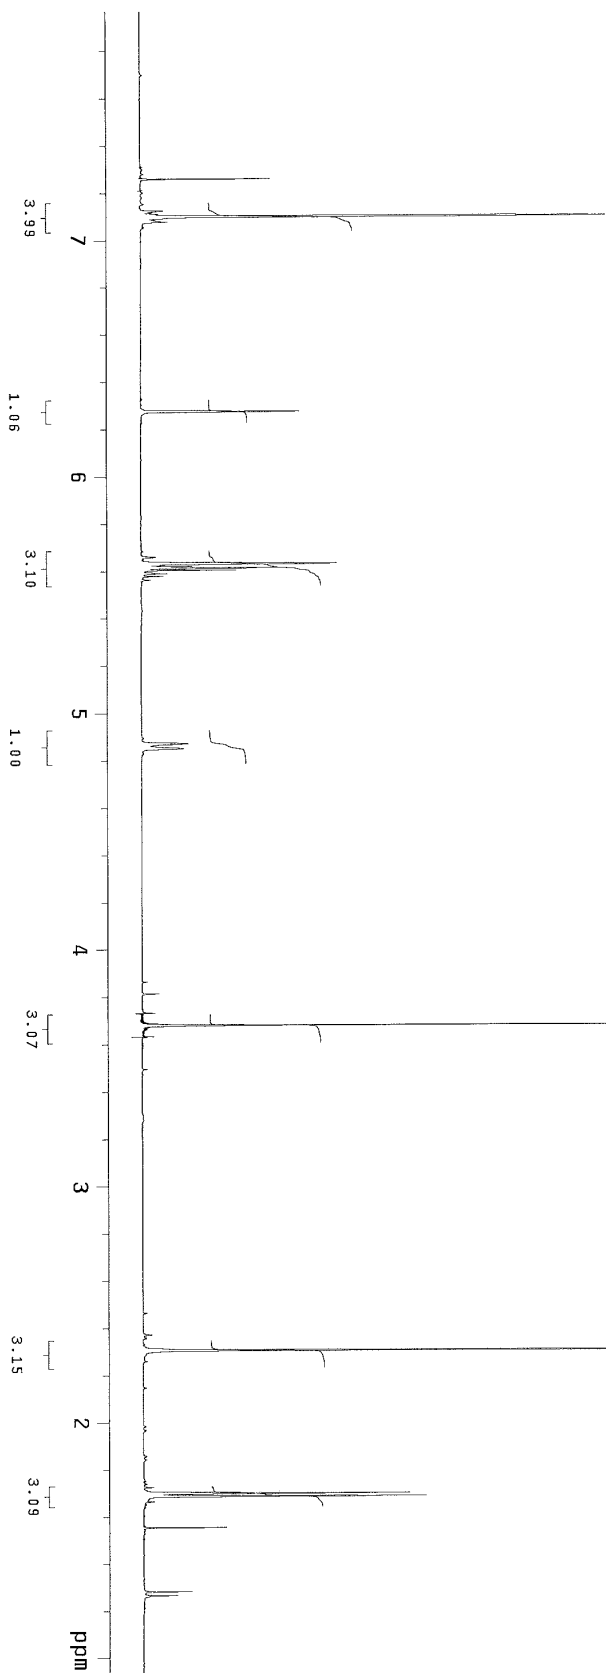

FC-7-240-8-1H.1.fid  
1H starting parameters (zg30)  
DRX-500 TRIC  
061212 CCC

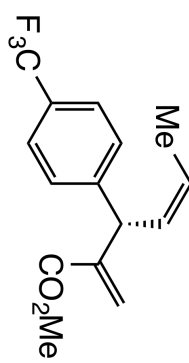

**21b, Scheme 5**

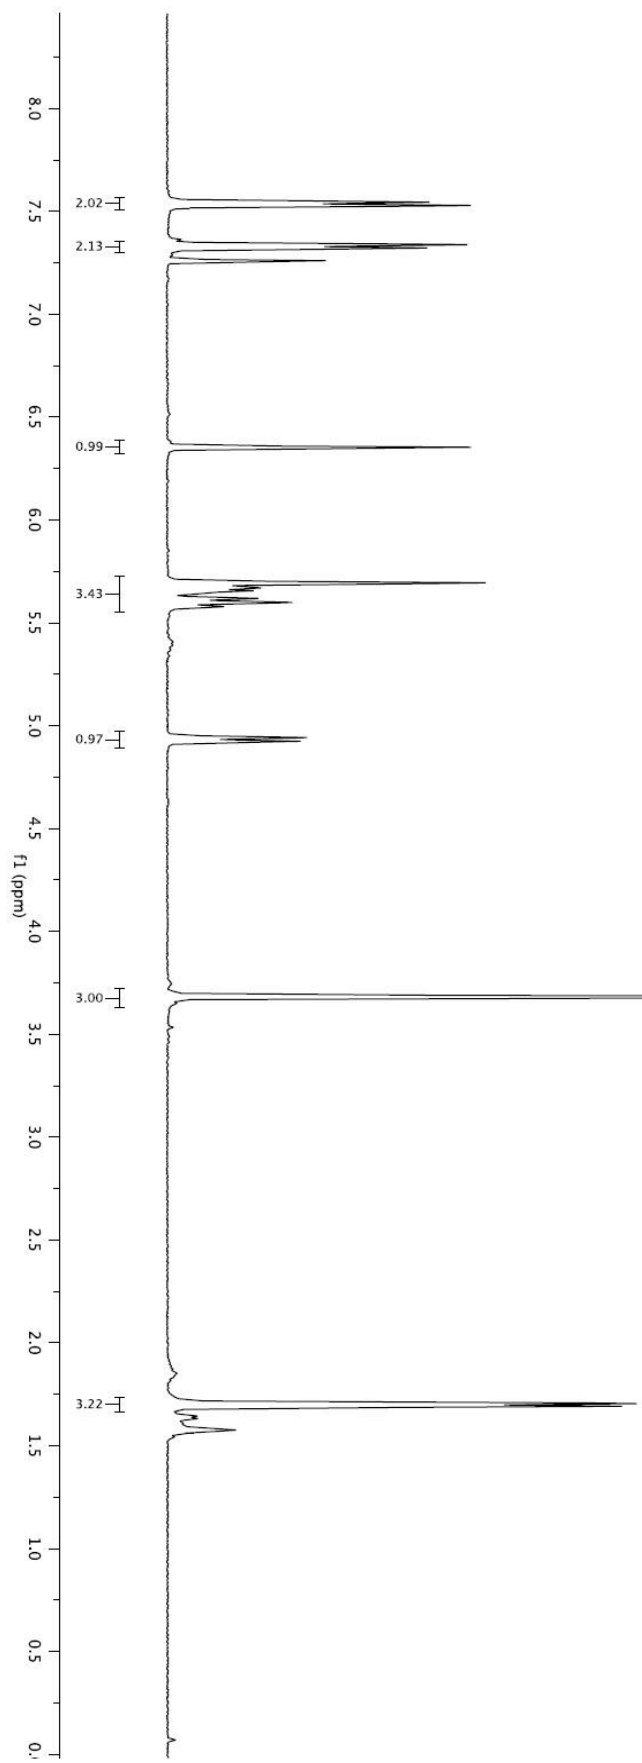

FC-7-241-8.1.fid  
1H starting parameters (zg30)  
DRX-500 TRIC  
061212 GCC

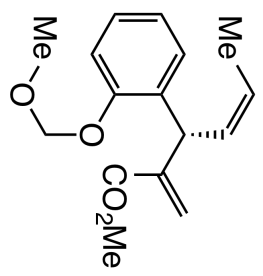

**21c, Scheme 5**

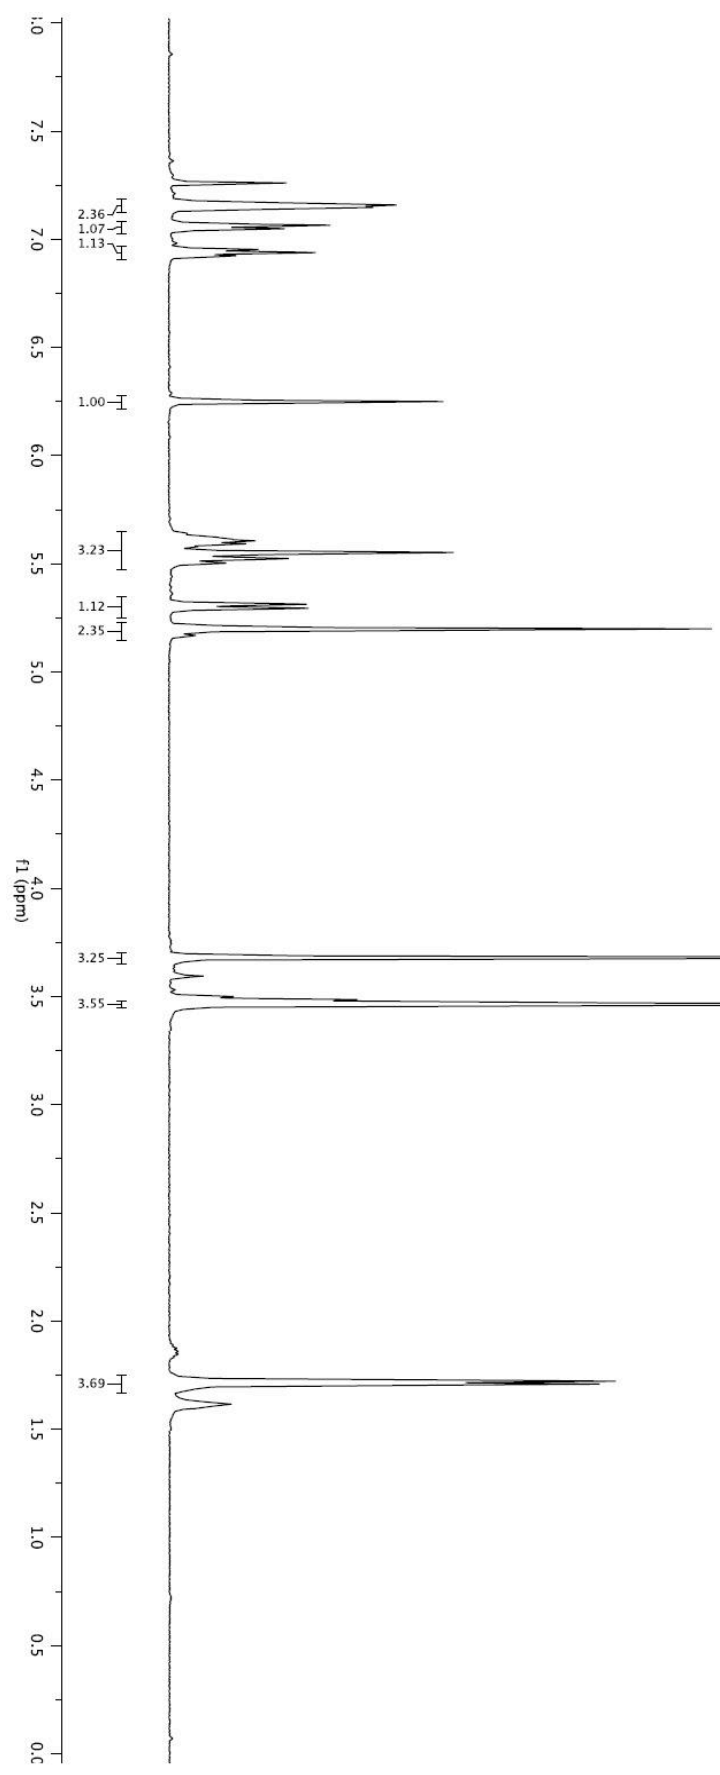



```

Sample Name: FG-VIII-093-crude
EXPNO: 42
PROCNO: 1
F2 - Acquired on: 2013 Jun 11 20:13
Archive Path: /mnt/nc13/vnmrj3-ymprss400
Date_ Time: 2013 Jun 11 20:13
$SOLVENT: dms-d13
$NMR: 400
$P1: 1.000
$P2: 0.000
$P3: 0.000
$P4: 0.000
$P5: 0.000
$P6: 0.000
$P7: 0.000
$P8: 0.000
$P9: 0.000
$P10: 0.000
$P11: 0.000
$P12: 0.000
$P13: 0.000
$P14: 0.000
$P15: 0.000
$P16: 0.000
$P17: 0.000
$P18: 0.000
$P19: 0.000
$P20: 0.000
$P21: 0.000
$P22: 0.000
$P23: 0.000
$P24: 0.000
$P25: 0.000
$P26: 0.000
$P27: 0.000
$P28: 0.000
$P29: 0.000
$P30: 0.000
$P31: 0.000
$P32: 0.000
$P33: 0.000
$P34: 0.000
$P35: 0.000
$P36: 0.000
$P37: 0.000
$P38: 0.000
$P39: 0.000
$P40: 0.000
$P41: 0.000
$P42: 0.000
$P43: 0.000
$P44: 0.000
$P45: 0.000
$P46: 0.000
$P47: 0.000
$P48: 0.000
$P49: 0.000
$P50: 0.000
$P51: 0.000
$P52: 0.000
$P53: 0.000
$P54: 0.000
$P55: 0.000
$P56: 0.000
$P57: 0.000
$P58: 0.000
$P59: 0.000
$P60: 0.000
$P61: 0.000
$P62: 0.000
$P63: 0.000
$P64: 0.000
$P65: 0.000
$P66: 0.000
$P67: 0.000
$P68: 0.000
$P69: 0.000
$P70: 0.000
$P71: 0.000
$P72: 0.000
$P73: 0.000
$P74: 0.000
$P75: 0.000
$P76: 0.000
$P77: 0.000
$P78: 0.000
$P79: 0.000
$P80: 0.000
$P81: 0.000
$P82: 0.000
$P83: 0.000
$P84: 0.000
$P85: 0.000
$P86: 0.000
$P87: 0.000
$P88: 0.000
$P89: 0.000
$P90: 0.000
$P91: 0.000
$P92: 0.000
$P93: 0.000
$P94: 0.000
$P95: 0.000
$P96: 0.000
$P97: 0.000
$P98: 0.000
$P99: 0.000
$P100: 0.000

```

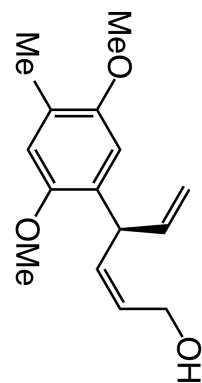

S2, Scheme 6

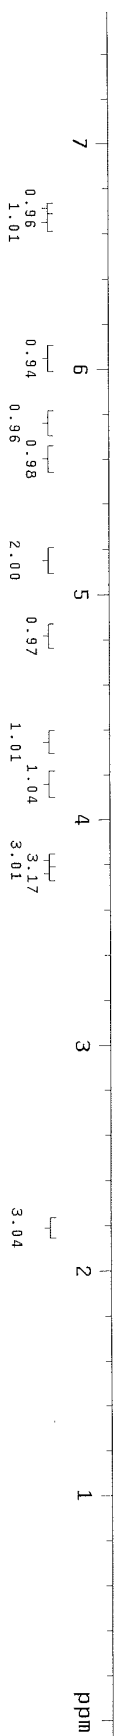

Sample Name: FG-VII-115-sm  
 EXPD CONTINUED ON: 29412  
 Vnmr13-VNMRs400  
 Archive Sample: 2013  
 Date: Jun 25 2013  
 File: 20130625\_115-13013  
 Sample Director: C13  
 Title: exp  
 FIDAPPROPRIATE: n  
 SW: 6410.3 gain  
 Pulse Sequence: zgpg30 (zgpg30) not used  
 Solvent: cdcl3 37.738 Hz  
 Date Collected: 400000000 2013 11.000  
 Data: 4 a17a 10.000  
 d3 1.000 FLAGS  
 n1 40 f1  
 ct 24 f2  
 TRANSMITTER H1 hs  
 tn 399.788 fn PROCESSING mn  
 strq 399.788 not used  
 tot 60  
 tpwr 5.500  
 pw DECOUPLER C13 SP 539.3  
 dn dn rfp 3599.5  
 dof 0 rfp 3701.2  
 dm nnn rfp 2902.4  
 decwawe W40\_HCNSmm 43.1  
 dpwr 35 PLOT 0  
 dmf 29412 WC 250  
 SC 0  
 VS 71  
 th 25  
 ai ph

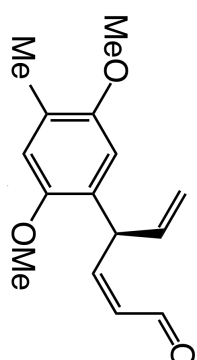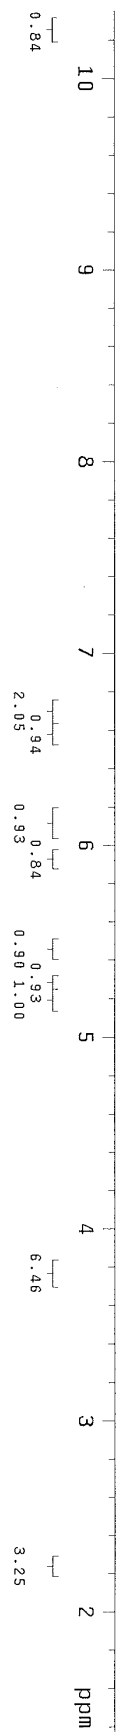

Sample: FG-VII-238-pdt-2  
 F19q22exy1proton

|                       |         |          |
|-----------------------|---------|----------|
| Pulse Sequence: s2pu1 | SPECIAL | 25.0     |
| date: Dec 18 2012     | temp    | not used |
| solvent: cdcl3        | gain    | 20       |
| file                  | sp1n    | 0.008    |
| exp                   | hst     | 11.000   |
| ACQUISITION           | dtf     | 10.000   |
| sw                    | 8410.3  |          |
| af                    | 2.049   |          |
| fd                    | 26264   |          |
| bs                    | 4000    |          |
| ss                    | 2       |          |
| dl                    | 1.000   |          |
| nt                    | 40      |          |
| ct                    | 28      |          |
| TRANSMITTER           | HI      | SP       |
| tn                    | 399.788 | WP       |
| stfq                  | 399.8   | FT1      |
| tof                   | 60      | FTP      |
| tpwr                  | 5.500   | TP       |
| pw                    |         |          |
| DECOUPLER             | C13     | TP       |
| dh                    | 0       | WC       |
| dof                   | 0       | SC       |
| dm                    | nmn     | VS       |
| dmm                   | C       | TH       |
| dpwr                  | 35      |          |
| dntf                  | 29412   | AI       |

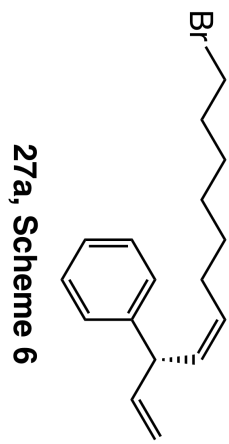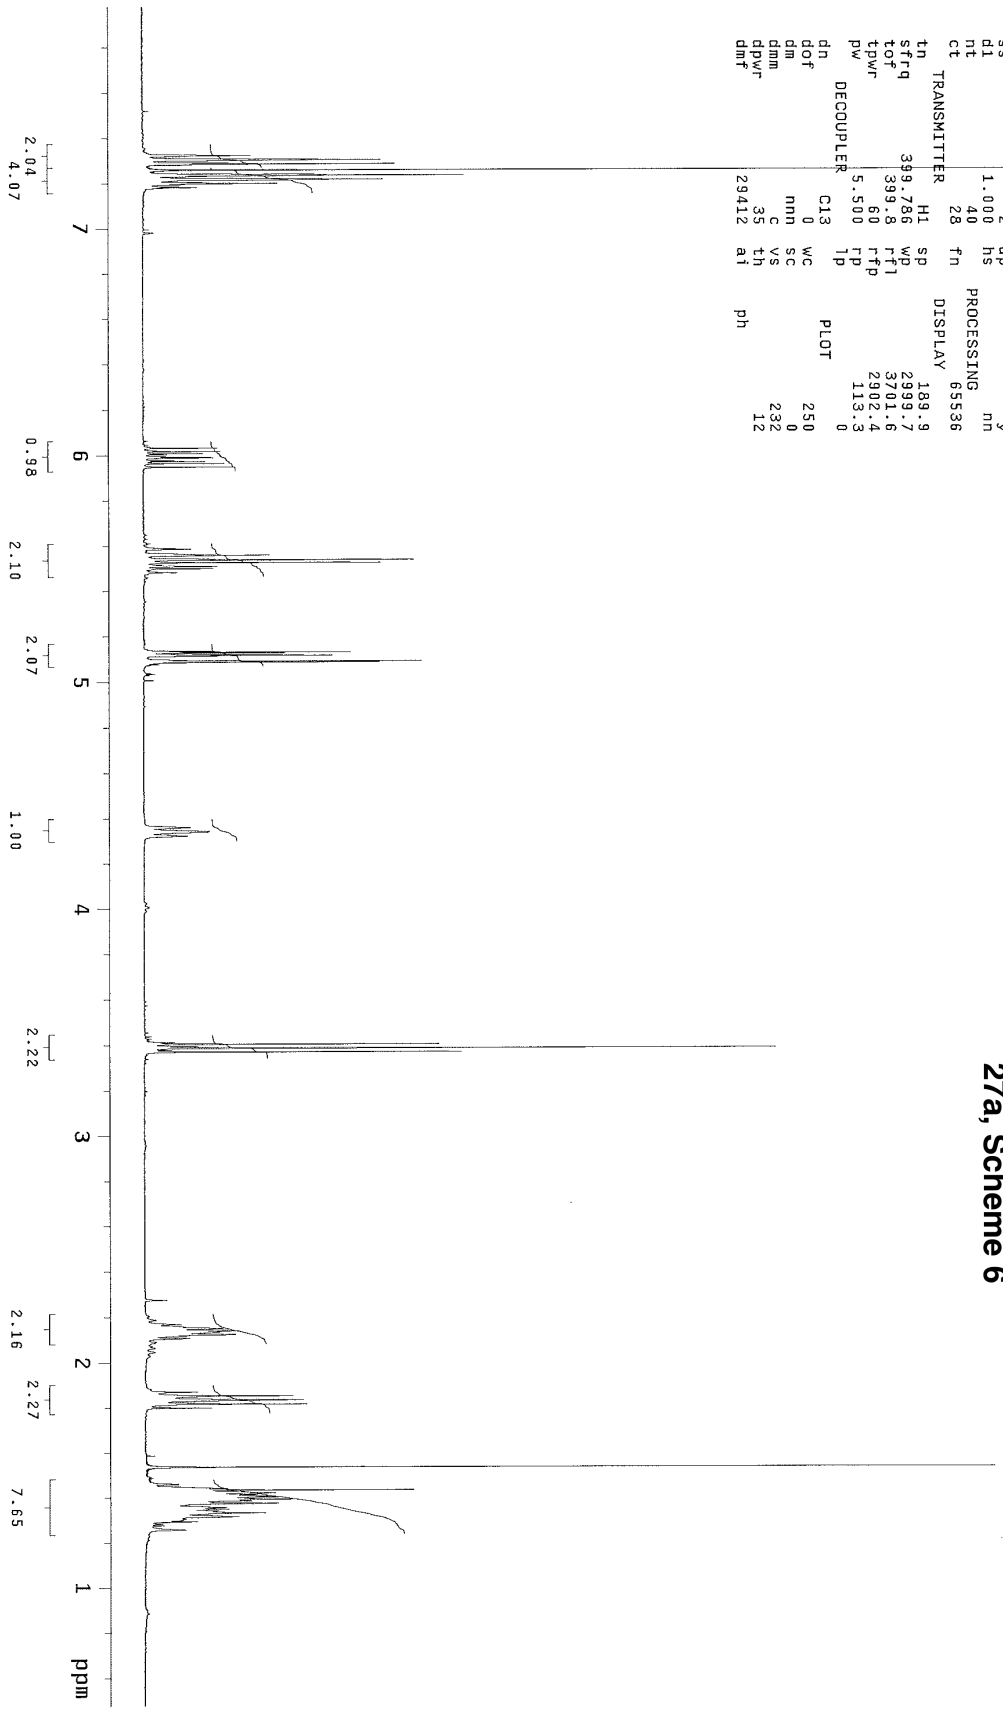



Sample: FG-VII-237-pdt  
 Fxyq2hexProton

|                       |         |          |
|-----------------------|---------|----------|
| Pulse Sequence: s2pu1 | SPECIAL | 25.0     |
| date Dec 18 2012      | temp    | not used |
| solvent dcd13         | gain    | 20       |
| file exp              | spin    | 0.008    |
| ACQUISITION           | hst     | 11.000   |
| sw 6410.3             | pu90    | 10.000   |
| at 2049               | atfa    | 10.000   |
| pd 26284              | FLAGS   |          |
| fd 4000               | f1      | n        |
| bs 4                  | in      | n        |
| ss 2                  | dp      | y        |
| dl 1.000              | hs      | nm       |
| nt 40                 | fn      | 65536    |
| ct TRANSMITTER        | fn      | DISPLAY  |
| tn H1                 | sp      | 268.9    |
| strq 399.786          | wp      | 2859.7   |
| tof 399.8             | rT1     | 3702.0   |
| tpwr 60               | rTfP    | 2902.4   |
| pw 5.500              | rP      | 108.7    |
| DECOUPLER C13         | Ip      | 0        |
| dn 0                  | WC      | 250      |
| dof 0                 | sc      | 0        |
| dm nnn                | vs      | 271      |
| dmm C                 | th      | 12       |
| dpwr 35               | ph      |          |
| dmf 29412             | at      |          |

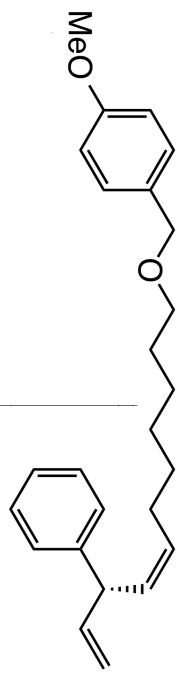

27b, Scheme 6

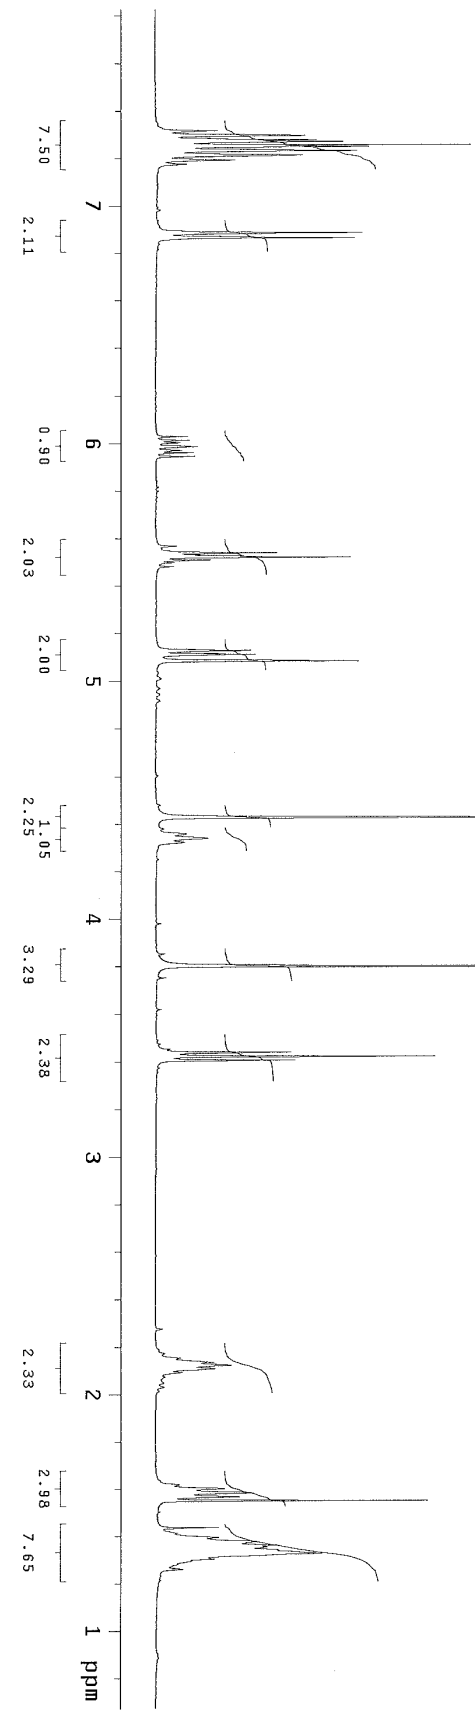

Sample: FG-VII-216-A-pdt  
 F:\pk16x\proton

|                 |            |         |          |
|-----------------|------------|---------|----------|
| Pulse Sequence: | s2pu1      | temp    | 25.0     |
| date            | Dec 8 2012 | gain    | not used |
| solvent         | cdcl3      | spin    | 20       |
| file            | exp        | hst     | 0.008    |
| ACQUISITION     |            | pw90    | 11.000   |
| sw              | 6410.3     | ai      | 10.000   |
| at              | 2.049      | al      | 10.000   |
| np              | 26264      | flags   |          |
| fb              | 4000       |         |          |
| bs              | 4          |         |          |
| ss              | 2          |         |          |
| di              | 1.000      | hs      | nh       |
| nt              | 40         | fn      | 65536    |
| ct              | 8          |         |          |
| TRANSMITTER     |            | DISPLAY | -15.9    |
| tn              | H1         | SP      | 3221.4   |
| stf             | 399.786    | WP      | 3701.6   |
| tof             | 399.8      | r       | 2902.4   |
| tdwr            | 60         | r       | 117.2    |
| pw              | 5.500      | ip      | 0        |
| DECOUPLER       | C13        | PLOT    | 250      |
| dof             | 0          | WC      | 0        |
| dsm             | nmn        | SC      | 179      |
| dmm             | C          | VS      | 12       |
| dmr             | 35         | th      |          |
| dmr             | 29412      | at      |          |
| dmr             |            | ph      |          |

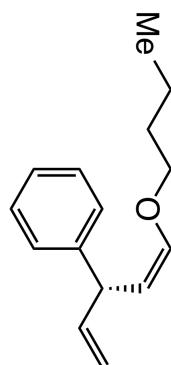

27c, Scheme 6

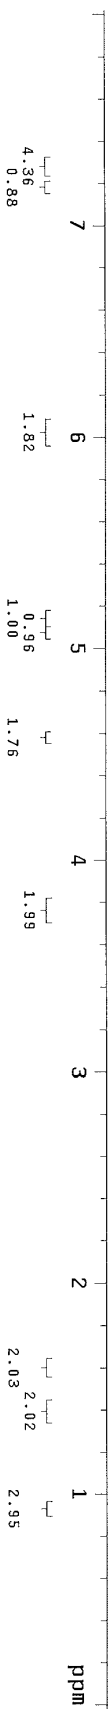

Sample: FG-VII-207-B-pdt  
F1kpt1ex:Proton

|                 |             |         |          |
|-----------------|-------------|---------|----------|
| Pulse Sequence: | s2pul1      | SPECIAL | 25.0     |
| date:           | Nov 20 2012 | temp    | not used |
| solvent:        | cdcl3       | gain    | 0.008    |
| file:           | exp         | spin    | 11.000   |
| ACQUISITION     | sw          | ns      | 10.000   |
| at              | 6410.3      | pw      | 10.000   |
| nt              | 2.063       | at      | 10.000   |
| td              | 26284       | ft      |          |
| bs              | 4000        | fl      |          |
| ss              | 4           | fm      |          |
| ds              | 2           | dp      |          |
| dl              | 1.000       | hs      |          |
| nt              | 40          | fn      |          |
| ct              | 12          | fr      |          |
| TRANSMITTER     | H1          | DISPLAY | 65536    |
| tn              | 399.786     | sp      | 239.6    |
| strq            | 399.8       | wp      | 2384.3   |
| tof             | 60          | rfl     | 3702.0   |
| tpwr            | 5.500       | rfd     | 2902.4   |
| pw              | 5.500       | rp      | 116.6    |
| DECOUPLER       | C13         | TP      | 0        |
| dn              | 0           | WC      | 250      |
| dof             | 0           | SC      | 0        |
| dm              | nm          | VS      | 76       |
| dmm             | C           | TH      | 12       |
| dpwr            | 35          | PH      |          |
| dmt             | 29412       |         |          |

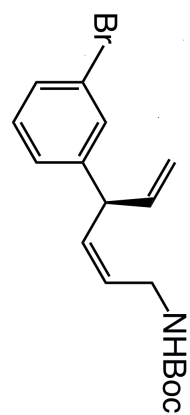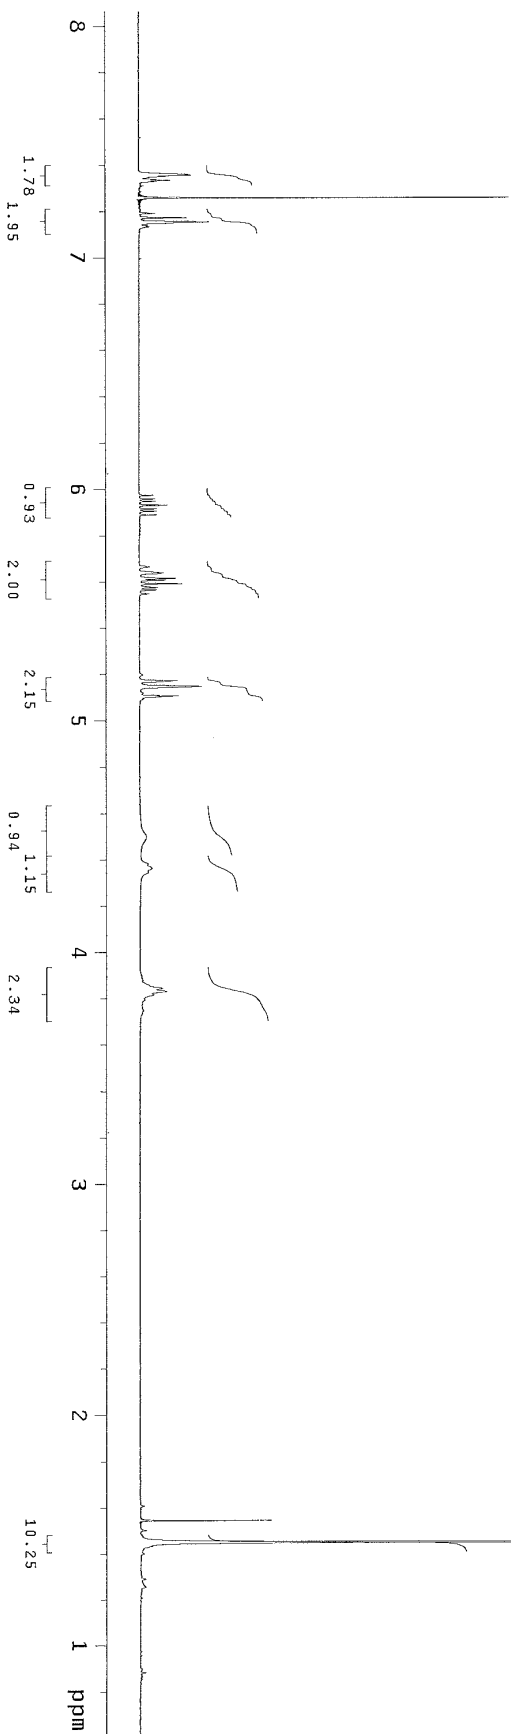



Sample: FG-VII-198-A-pdt  
 Exp: 5  
 Exp: 10

|                       |            |          |
|-----------------------|------------|----------|
| Pulse Sequence: s2pu1 | SPECIAL    | 25.0     |
| Date: Nov 8 2012      | temp       | not used |
| Solvent: cdcl3        | gain       | 0.68     |
| F1 file: exp          | spn        | 11.008   |
| F2 file: ns50         | ns50       | 11.000   |
| SW: 8410.3            | pw90       | 10.000   |
| at: 2.049             | altA       |          |
| np: 26284             | FLAGS      |          |
| fb: 4000              | i1         | n        |
| bs: 4                 | in         | n        |
| ss: 2                 | dp         | y        |
| dl: 1.000             | hs         | nm       |
| nt: 40                | fn         | nm       |
| ct: 8                 | PROCESSING | 65536    |
| TRANSMITTER           | DISPLAY    |          |
| tn: H1                | SP         | 245.6    |
| sfreq: 399.786        | WP         | 2978.0   |
| tof: 399.8            | rfl        | 3701.6   |
| tpwr: 60              | rftp       | 2902.4   |
| pw: 5.500             | rp         | 116.5    |
| DECOUPLER             | tp         | 0        |
| dn: C13               | PLOT       |          |
| dof: 0                | WC         | 250      |
| dm: 0                 | mn         | 0        |
| dmm: C                | vs         | 120      |
| dpwr: 35              | th         | 12       |
| dmf: 29412            | ai         | ph       |

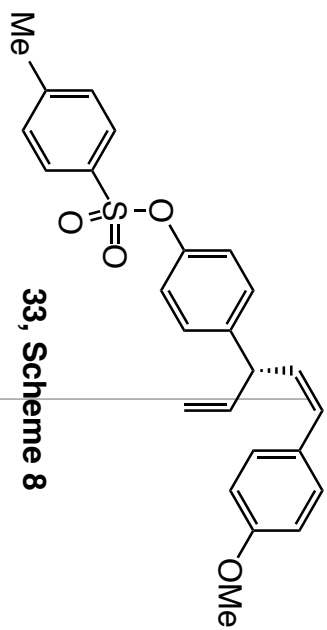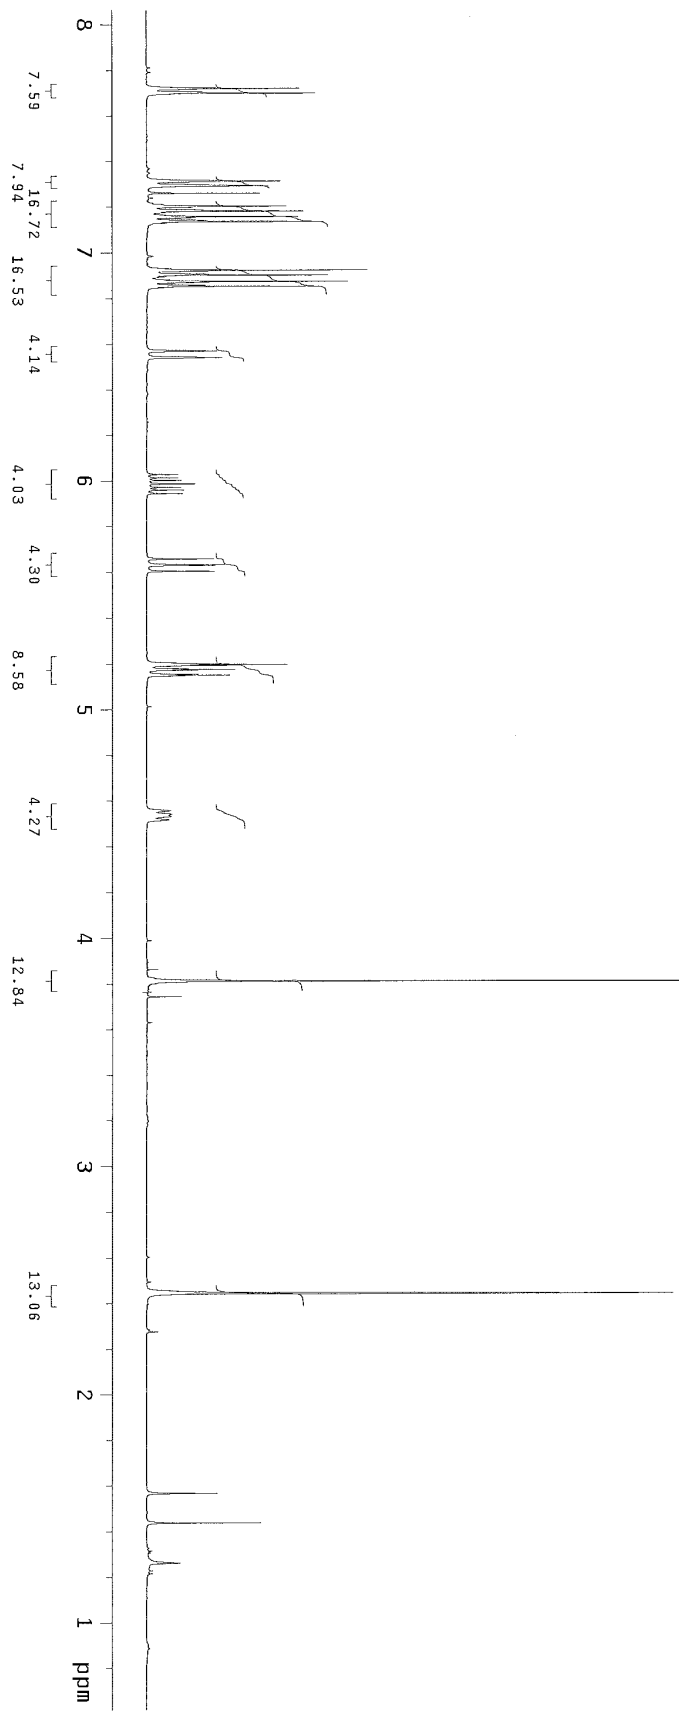

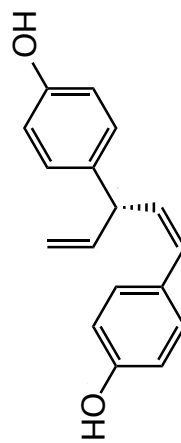

**niasol, Scheme 8**

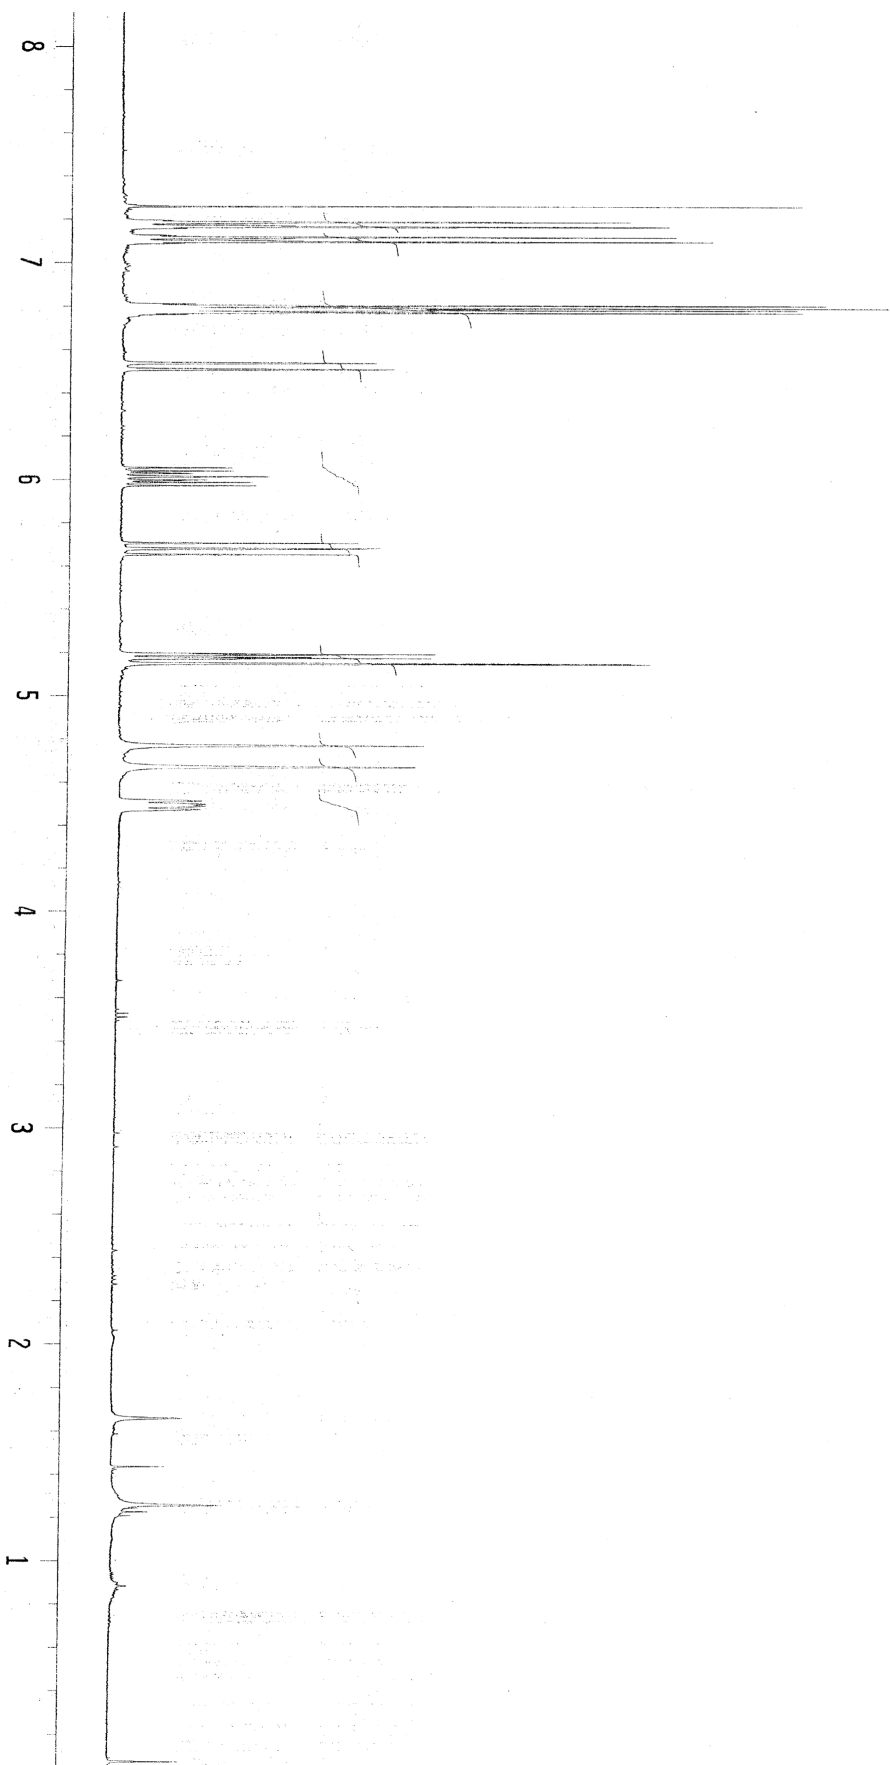

Sample Name: EG-VT1-138\_138-pdt  
 Date Collected on: 07/11/2013  
 Name: 18-VMPRES00  
 Acquisition Date: 07/11/2013  
 Date: 07/11/2013  
 File Name: 18-VMPRES00  
 File Path: C:\13C\13C\18-VMPRES00  
 FID Acquisition: 1.000  
 SW: 8012.8  
 Pulse Sequence: zgpg30 (zgpg30) (zgpg30)  
 Solvent: cdcl3  
 Date Collected: 07/11/2013  
 File Name: 18-VMPRES00  
 File Path: C:\13C\13C\18-VMPRES00

temp 25.0  
 gain 30  
 satmode n  
 wet n  
 SPECIAL n

PROCESSING not used  
 DISPLAY -44.2  
 SP 3876.3  
 WP 4636.3  
 RF1 3629.1  
 FFP 138.7  
 TP 0  
 PLOT 250  
 WC 0  
 SC 600  
 VS 0  
 TN 600  
 AT 7

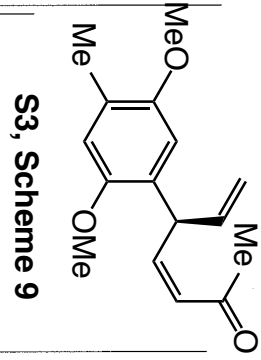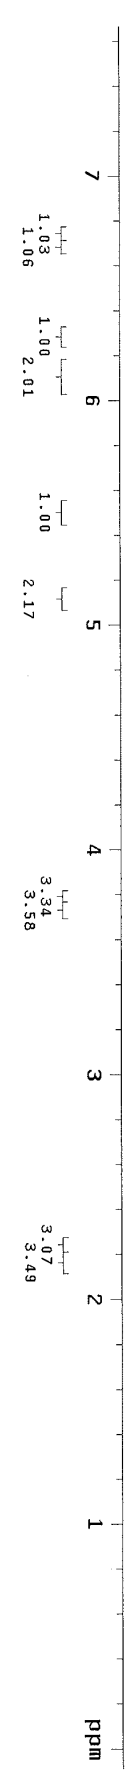

Sample Name: EG-VI1140-pdt  
 EG-VI1140-pdt  
 Date: Jul 11 2013  
 Time: 11:20:13  
 File: VI1140-pdt  
 Dir: C:\Users\gao\Documents\VI1140-pdt

PRESATURATION  
 satmode n  
 wet n  
 SPECIAL n  
 temp 25.0  
 gain 60  
 pulse Sequence (P12pu) not used  
 solvent: cdcl3 0.008  
 DS collected 400.000 2013 11.000  
 DS at 10.000  
 at 10.000  
 FLAGS n  
 nt 40 f1 n  
 ct 40 f1 n  
 TRANSMITTER H1 hs n  
 tn 399.786 f1 hs n  
 tof 399.8 f1 hs n  
 tpwr 60 f1 hs n  
 pw 5.500 SP 452.8  
 DECOUPLER C13 WP 2593.2  
 dn 0 rf1 3701.2  
 dof 0 rfp 2902.4  
 dm nnn 37.0  
 decwve v40\_HCN5mm 35  
 dpwr 29412 WC 250  
 dmf 29412 SC 0  
 VS 100  
 th 100  
 ai 18  
 ph

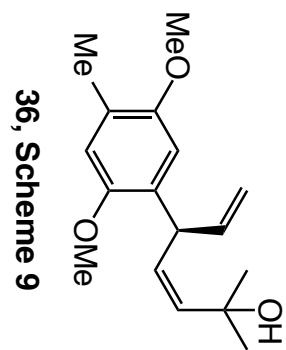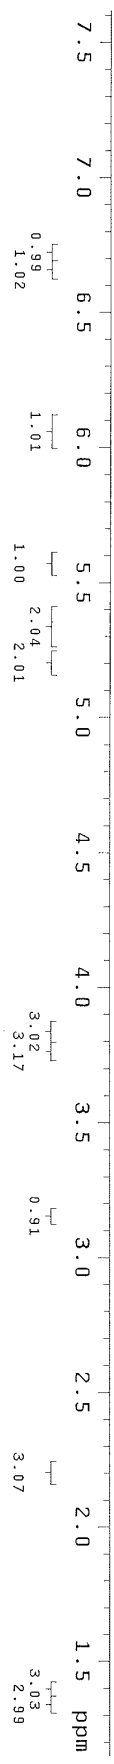





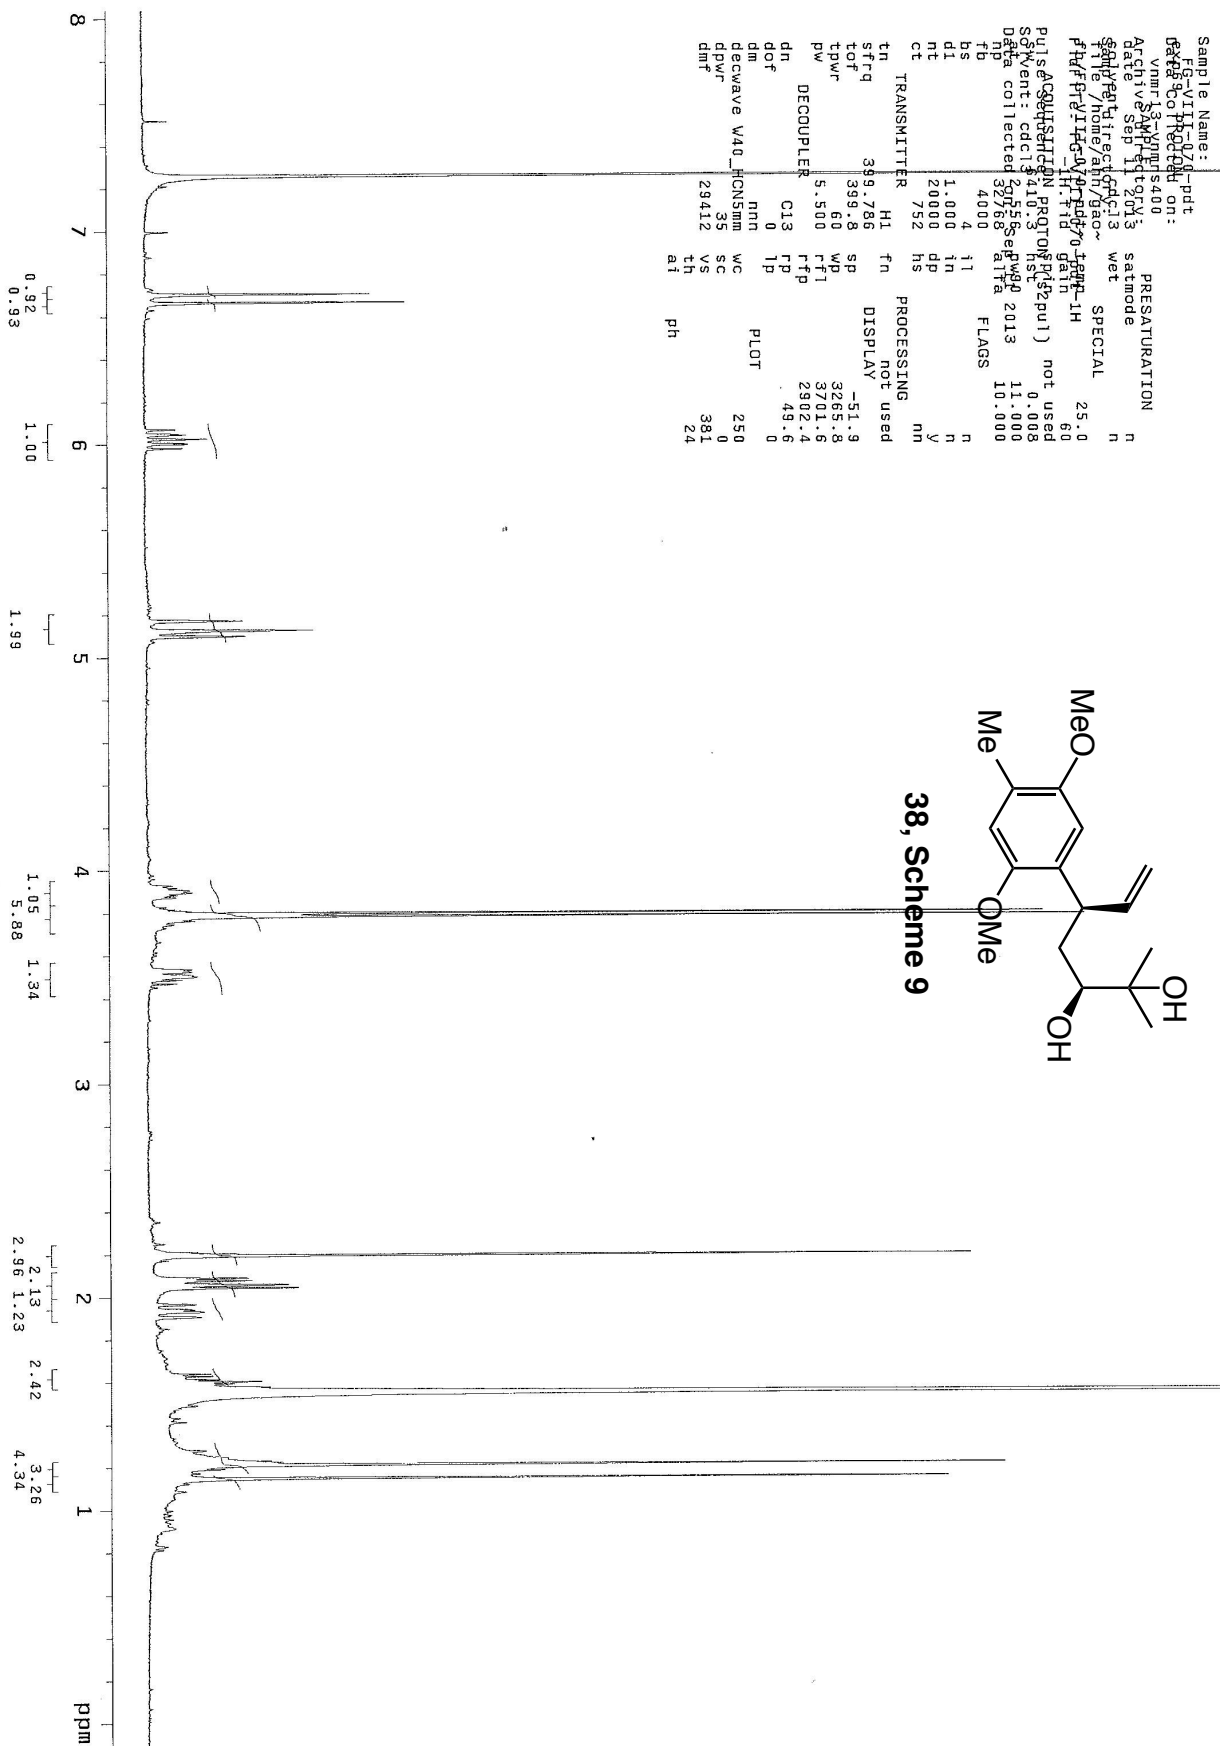



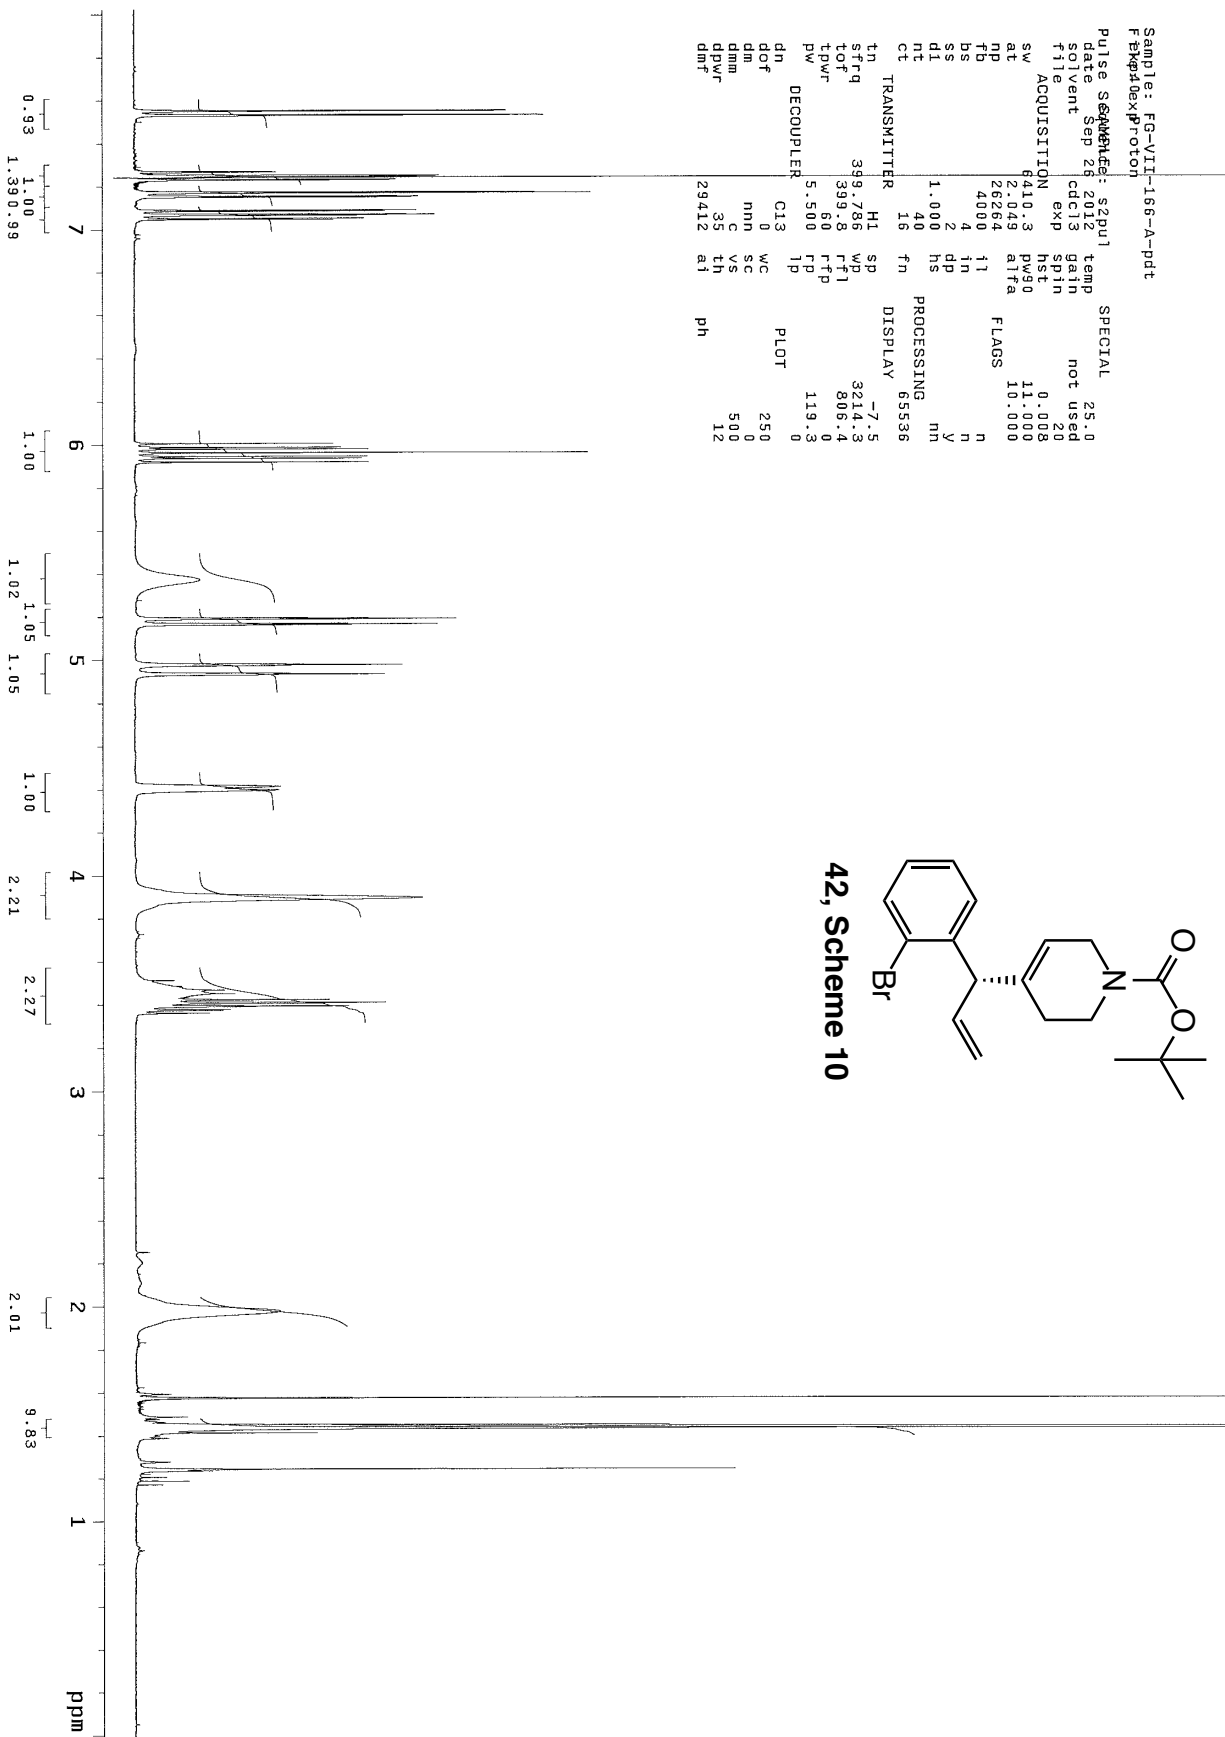

FG-VII-254-C-pdt-second.1.fid  
1H starting parameters (zg30)  
DRX-500 TBIC  
061212 CGC

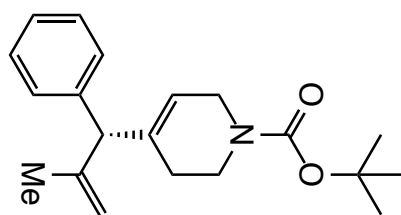

43a, Scheme 10

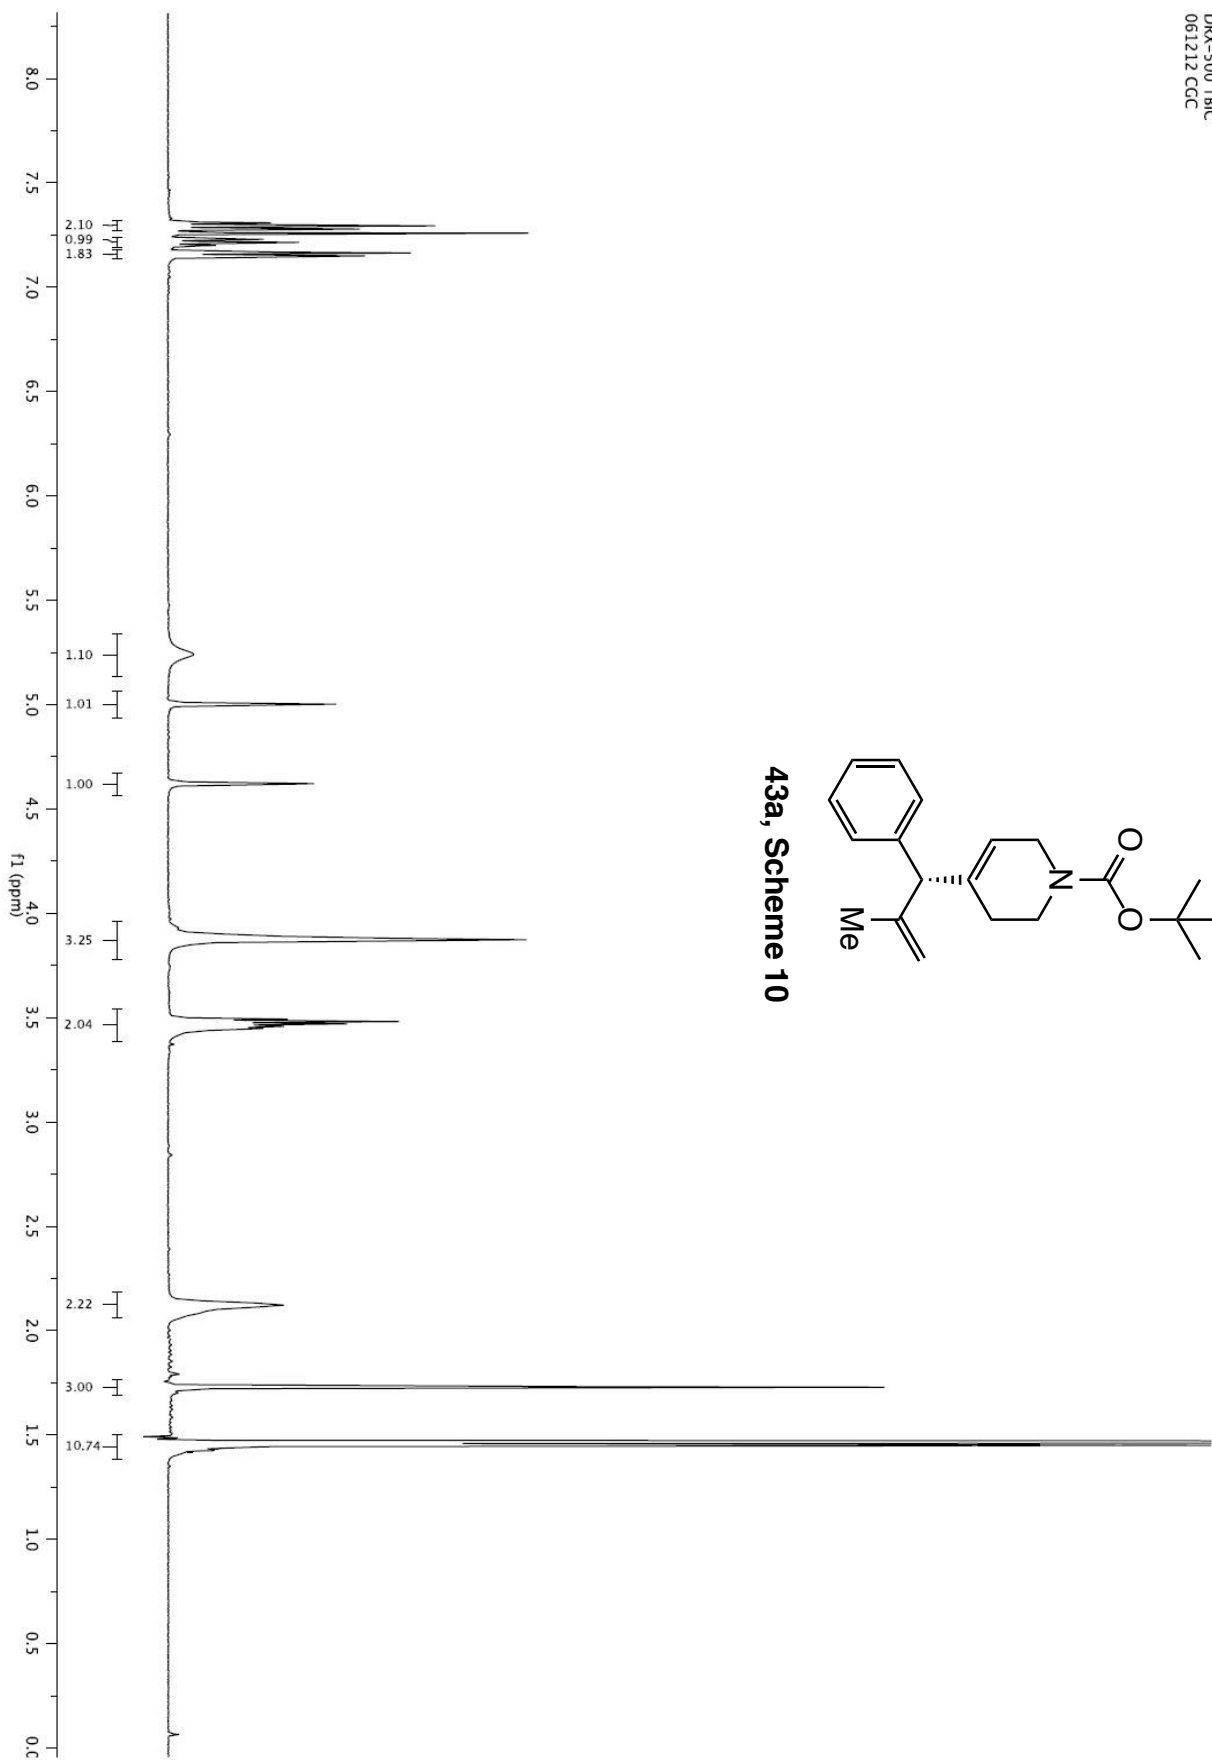

FC-VII-256-C-pdt\_1.fid  
1H starting parameters (zg30)  
DPX-500 TRIC  
061212 CGC

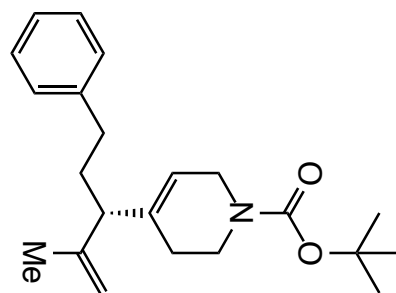

43b, Scheme 10

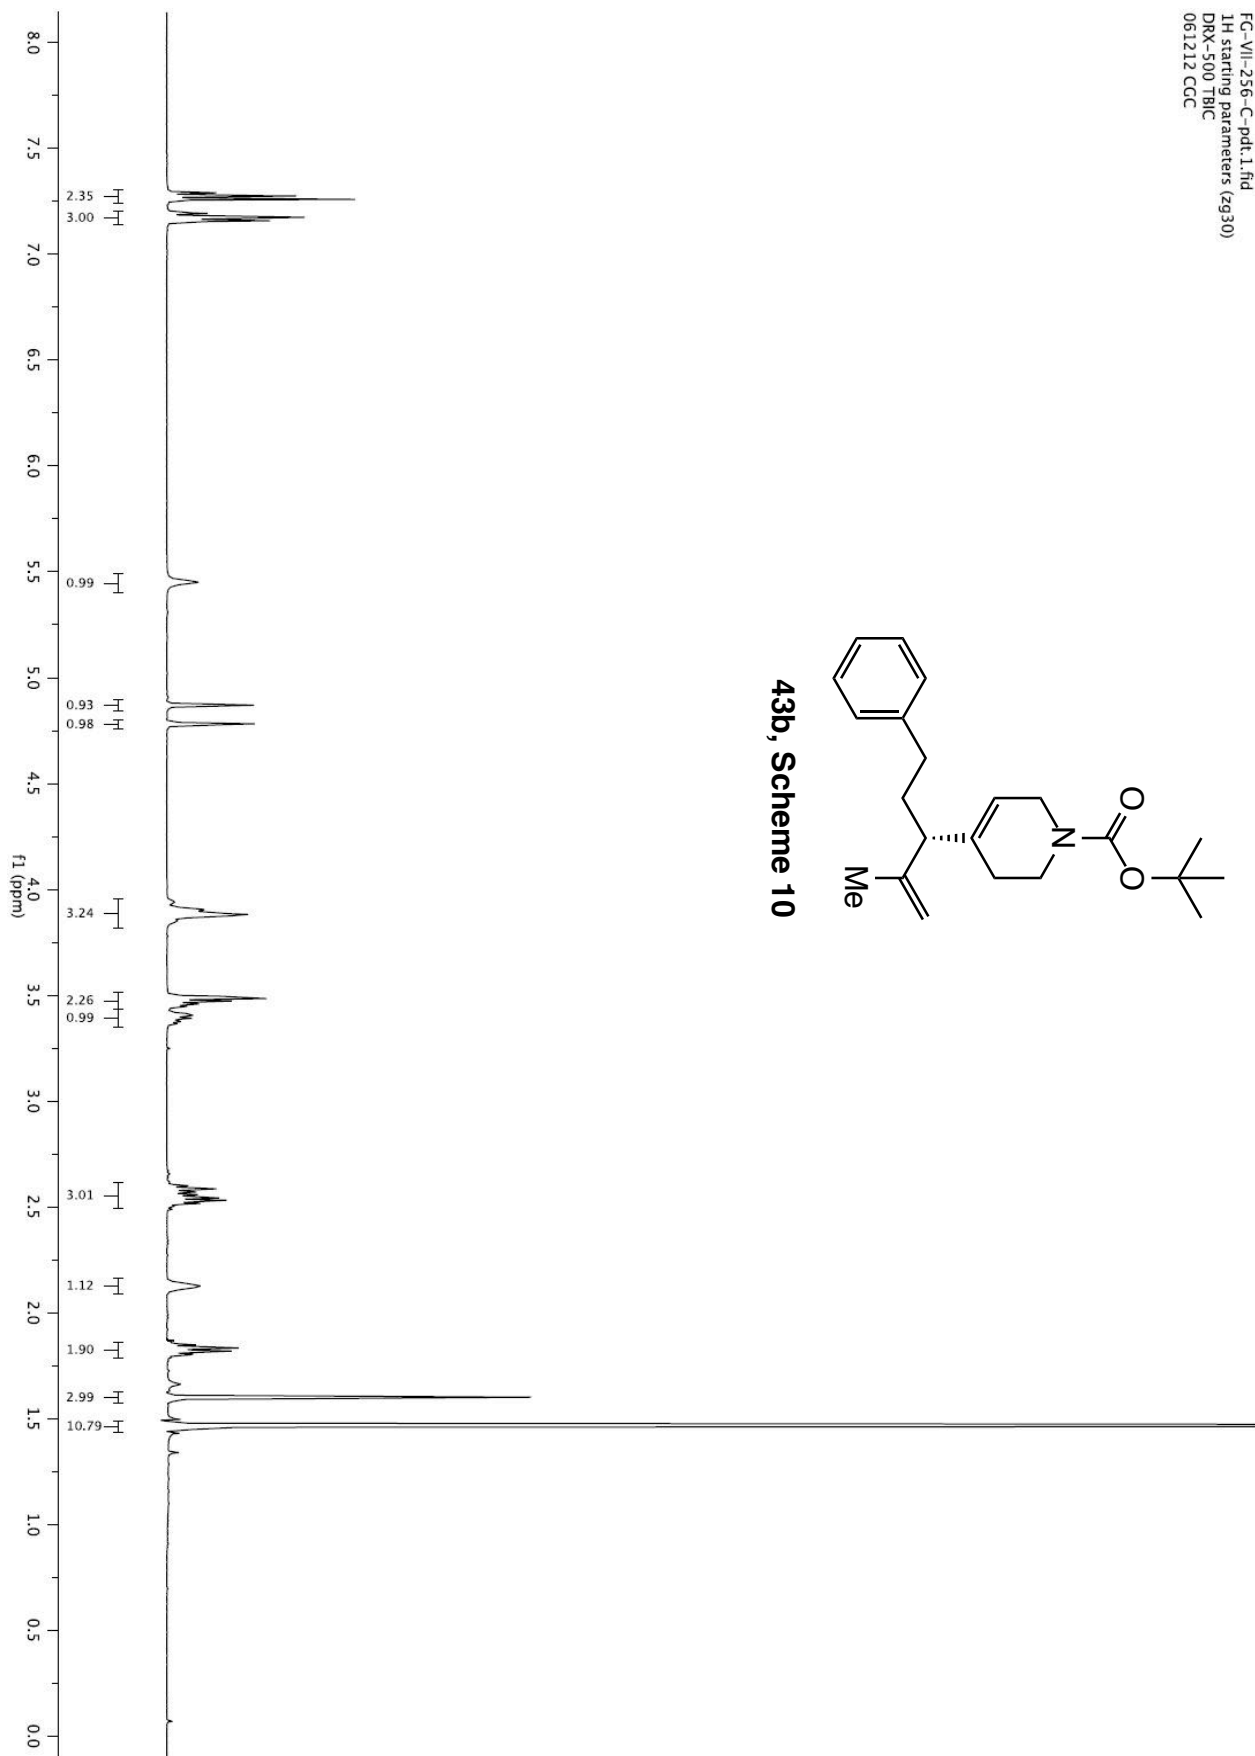

JLC-II-50\_F136-48

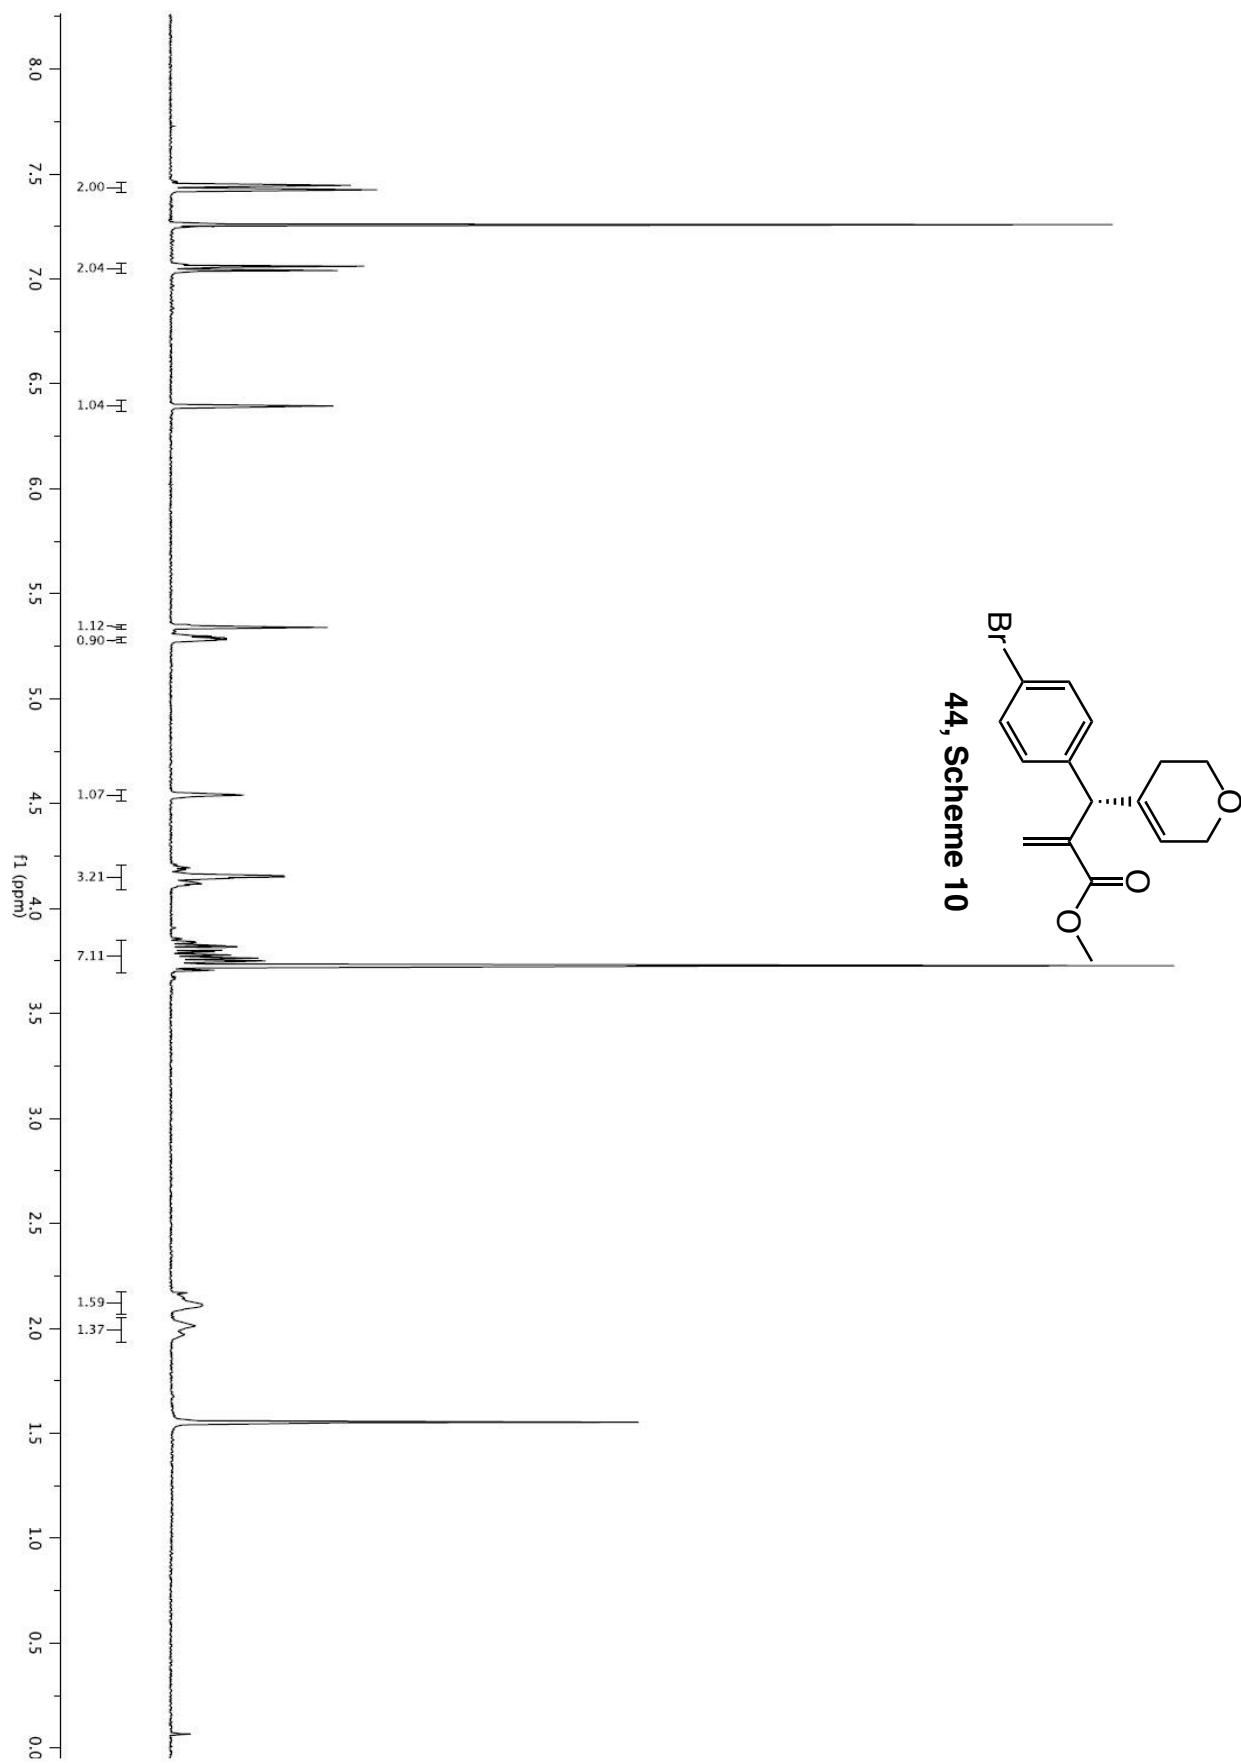

Sample: EG-VII-192-B-pdt  
 F-Expt1 expt01n

|                       |            |          |
|-----------------------|------------|----------|
| Pulse Sequence: s2pu1 | SPECIAL    | 25.0     |
| date Oct 22 2012      | temp       | not used |
| solvent cdcl3         | gain       | 20       |
| file                  | spin       | 0.008    |
| sw ACQUISITION        | hsr        | 11.000   |
| at 6410.3             | pw90       | 10.000   |
| np 2.049              | alfa       |          |
| fb 26264              |            |          |
| bs 4000               | 11         | n        |
| ss 4                  | in         | n        |
| d1 1.000              | ds         | y        |
| nt 40                 | hs         | nh       |
| ct 12                 | fn         |          |
|                       | PROCESSING | 65536    |
|                       | DISPLAY    |          |
| tn H1                 | sp         | 143.9    |
| sfreq 399.786         | wp         | 3095.4   |
| tof 399.8             | rf1        | 3701.6   |
| tpwr 60               | rfp        | 2902.4   |
| pw 5.500              | rp         | 59.9     |
|                       | DECOUPLER  | 1p       |
| dn C13                |            | 0        |
| dof 0                 | wc         | 250      |
| dm nnn                | sc         | 0        |
| dmm c                 | vs         | 72       |
| ddwr th               |            | 12       |
| dmf 29412             | at         |          |
|                       | ph         |          |

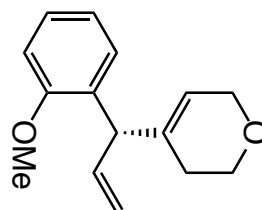

45, Scheme 10

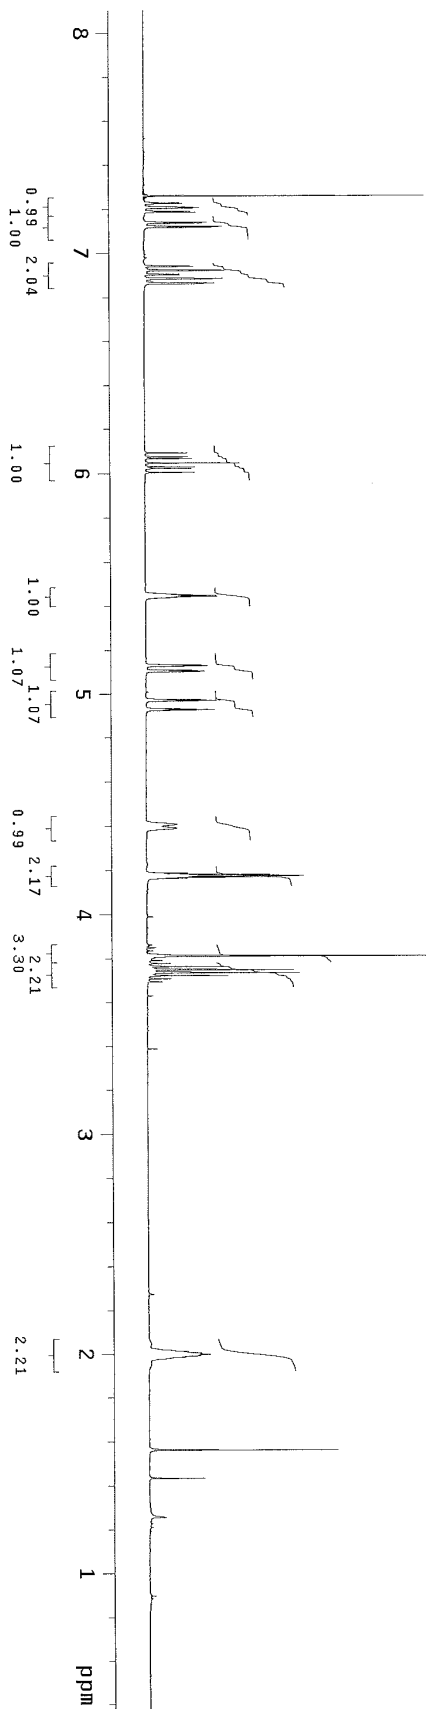



Sample: FG-VII-278-B-pdt  
 Fkpi exp10n

|                       |         |          |
|-----------------------|---------|----------|
| Pulse Sequence: s2pu1 | SPECIAL | 25.0     |
| date: Feb 25 2013     | temp    | not used |
| solvent: cdcl3        | gain    | 20       |
| file: exp             | spn     | 0.008    |
| ACQUISITION           | hst     | 11.000   |
| sw: 6410.3            | pw90    | 10.000   |
| at: 2.049             | alfa    |          |
| np: 26264             | FLAGS   |          |
| fb: 4000              |         |          |
| bs: 4                 |         |          |
| ss: 2                 |         |          |
| d1: 1.000             | hs      | nn       |
| nt: 40                | fn      | nn       |
| ct: 8                 | fn      | 65536    |
| TRANSMITTER           | DISPLAY |          |
| tn: H1                | sp      | 216.1    |
| sfreq: 399.786        | wp      | 3045.7   |
| tof: 399.8            | rf1     | 3701.6   |
| tpwr: 60              | rfd     | 2902.4   |
| pw: 5.500             | lp      | -19.4    |
| DECOUPLER: C13        | lp      | 0        |
| dn: 0                 | WC      | 250      |
| dof: 0                | SC      | 0        |
| dm: mnh               | VS      | 281      |
| dmm: C                | th      | 12       |
| dpwr: 35              | ph      |          |
| dmf: 29412            | ai      |          |

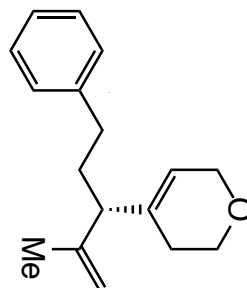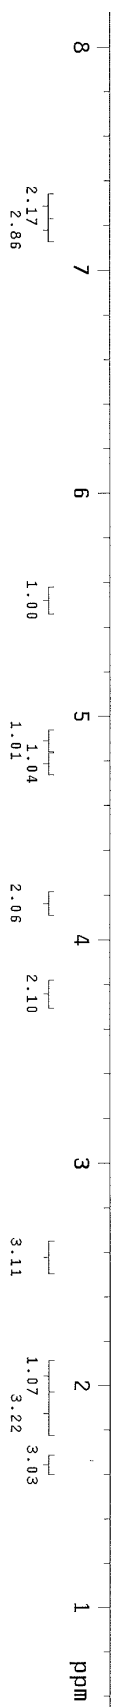

JLC-II-34C\_Fr17-27

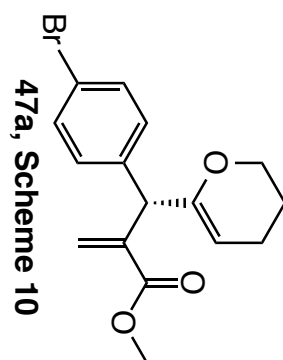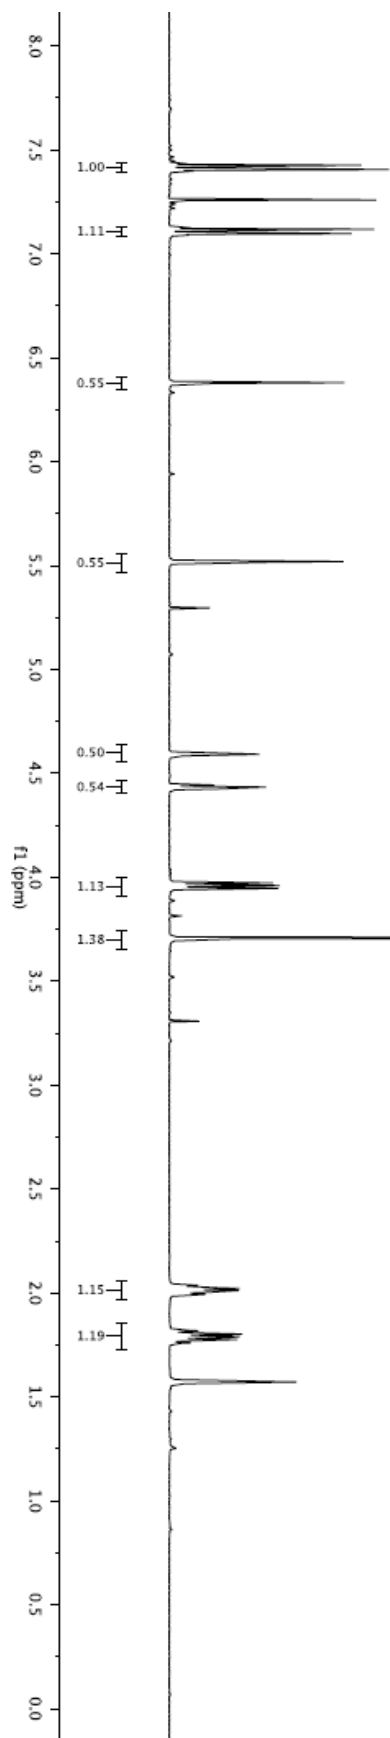

JLC-II-168\_F10-18

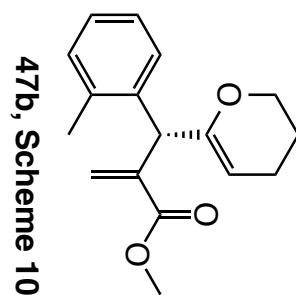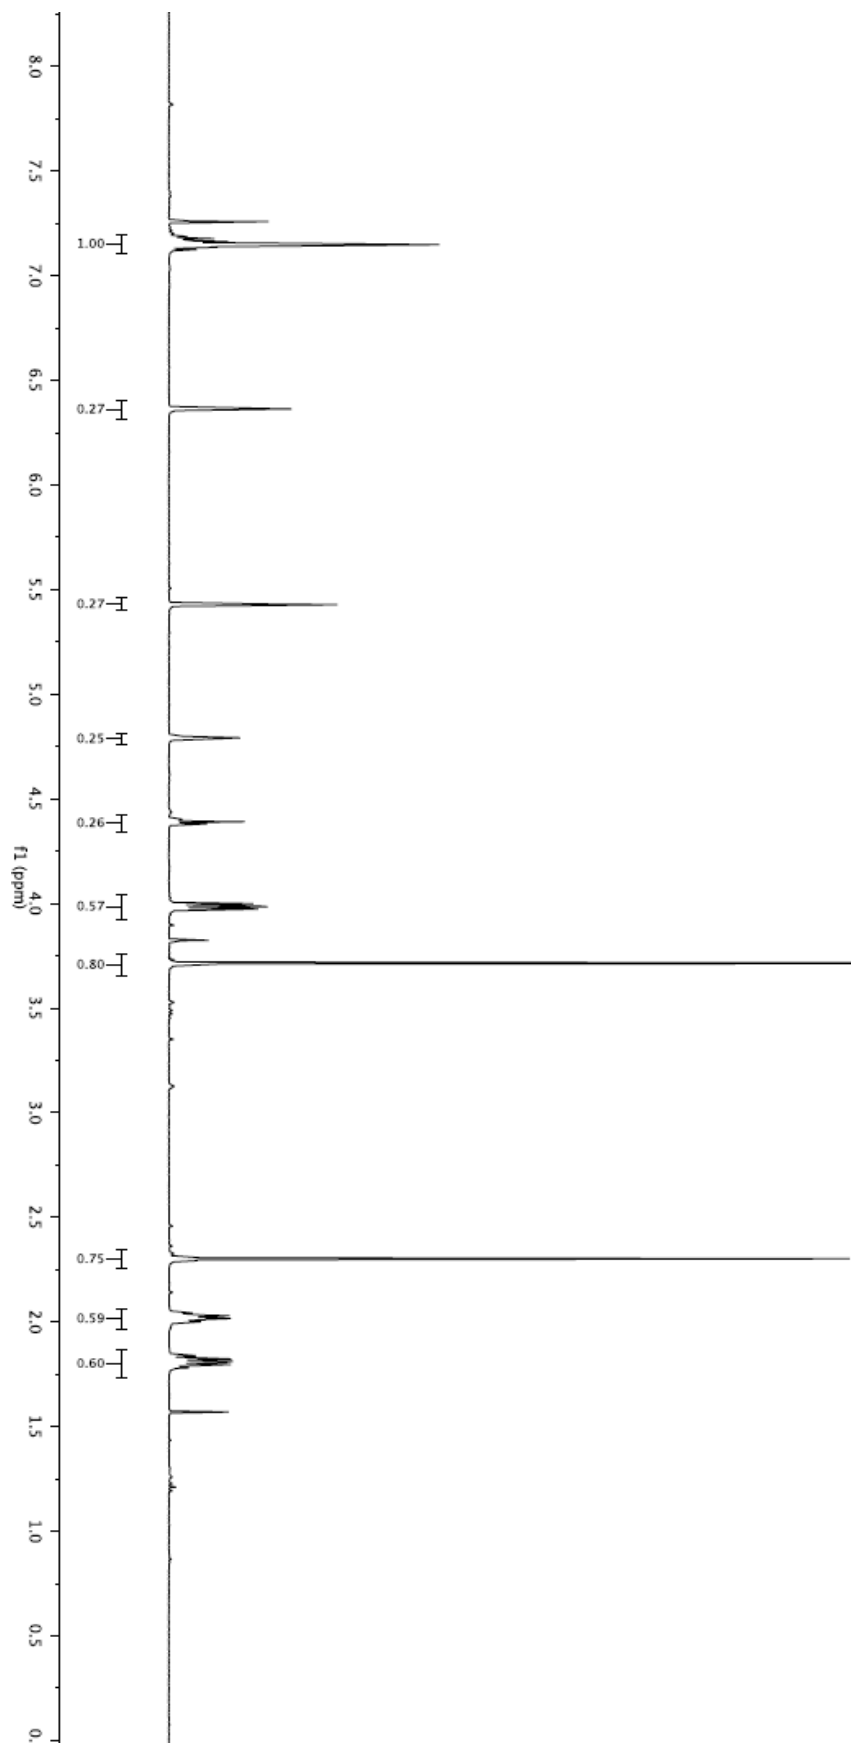

JLC-II-34D\_F10-16

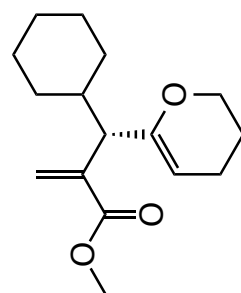

48, Scheme 10

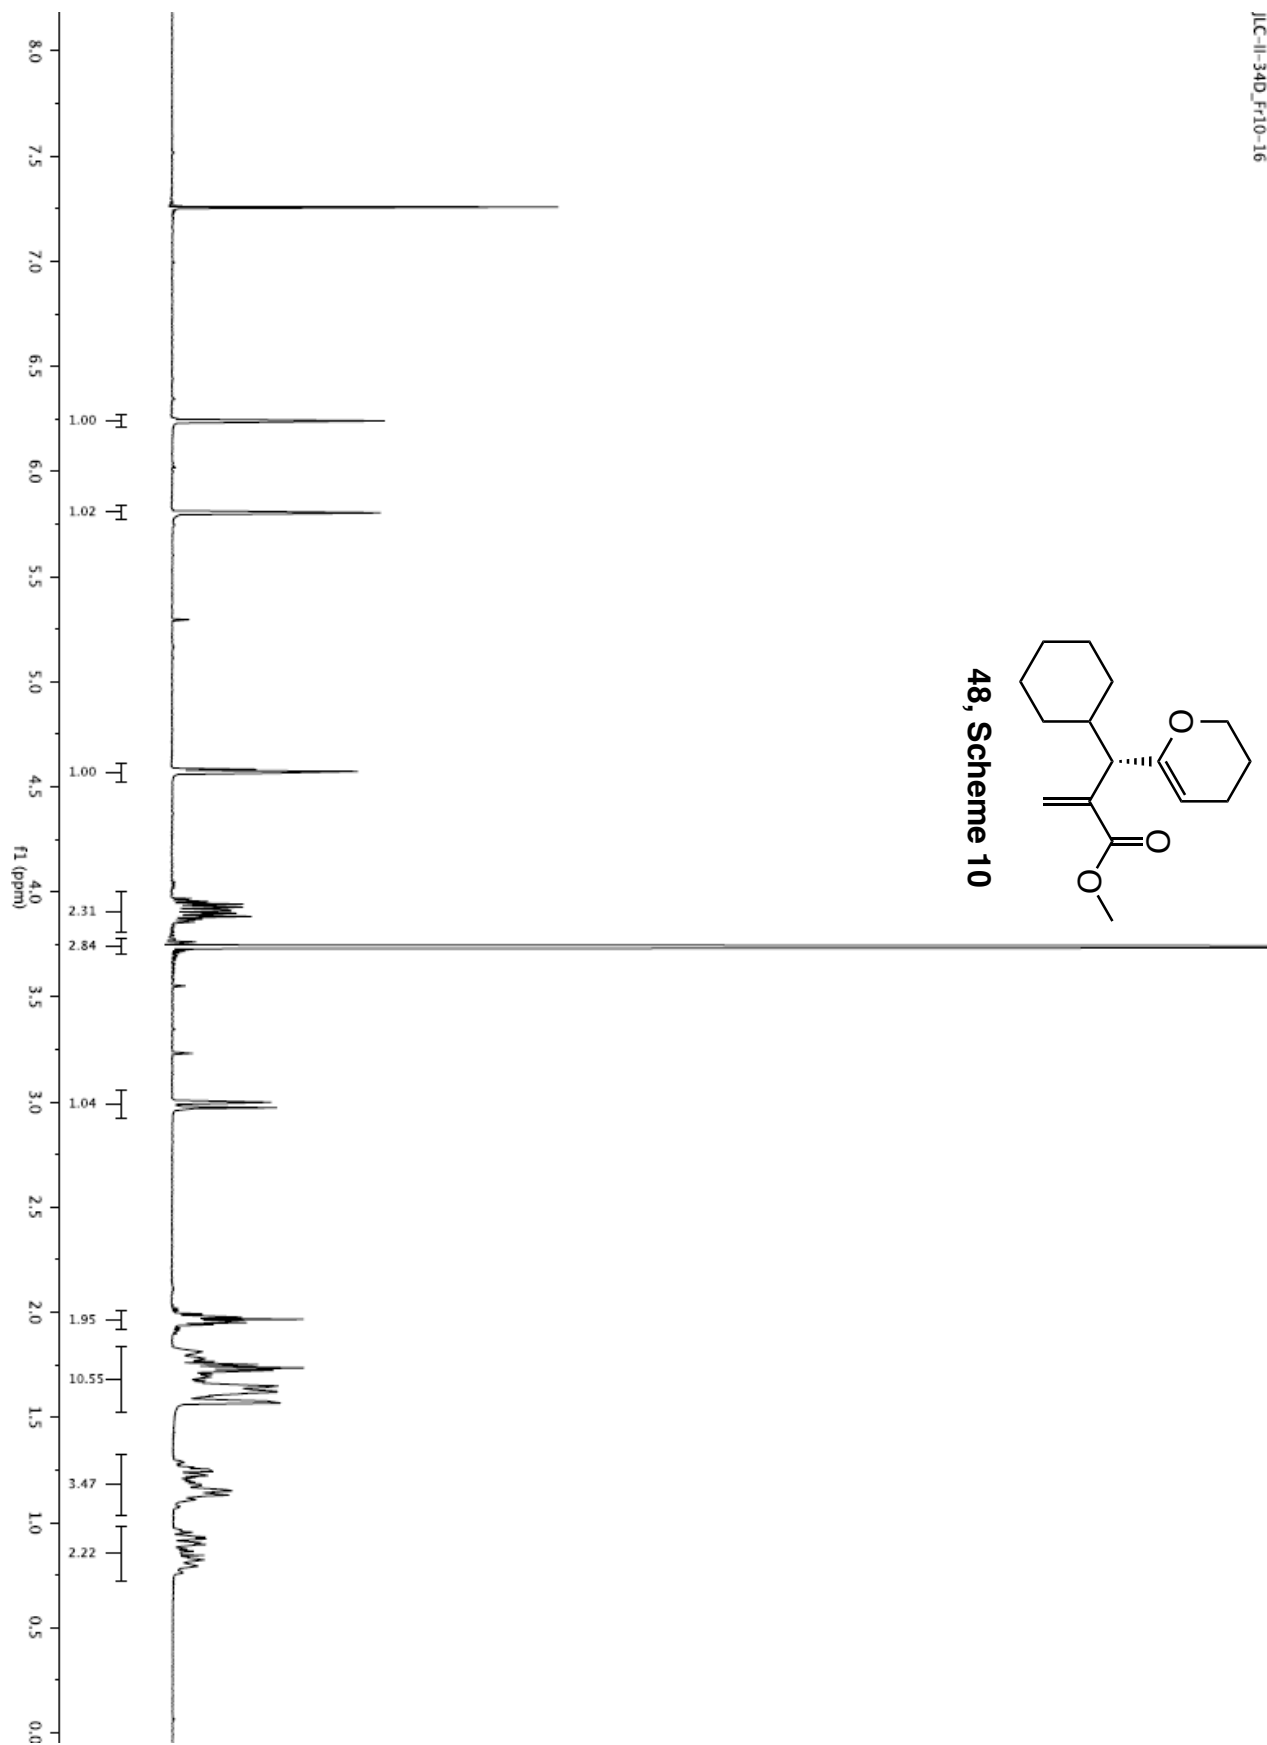

Sample: FG-VII-257-B-pdt  
 F t h x d e x p r o t i o n

|                 |             |            |          |
|-----------------|-------------|------------|----------|
| Pulse Sequence: | s2pul1      | SPECIAL    | 25.0     |
| date            | Feb 25 2013 | temp       | not used |
| solvent         | cdcl3       | gain       | 20       |
| file            | exp         | sp1n       | 0.008    |
| ACQUISITION     | hst         | hst        | 11.000   |
| sw              | 6410.3      | pw90       | 10.000   |
| at              | 2.049       | altfa      | 0        |
| np              | 26284       | FLAGS      | n        |
| fb              | 4000        | in         | y        |
| bs              | 4           | dp         | n        |
| ss              | 2           | hs         | n        |
| d1              | 1.000       | PROCESSING | 65536    |
| nt              | 40          | fn         | 0        |
| ct              | 16          | DISPLAY    | 180.2    |
| TRANSMITTER     | H1          | SP         | 3281.0   |
| stf             | 399.786     | ft1        | 3701.8   |
| tof             | 399.8       | rt1        | 2302.4   |
| tpwr            | 5.500       | TP         | -16.6    |
| pw              | 5.500       | TP         | 0        |
| DECOUPLER       | C13         | PLOT       | 250      |
| dn              | 0           | WC         | 100      |
| dof             | 0           | SC         | 12       |
| dmm             | mm          | VS         |          |
| dmm             | C           | th         |          |
| dpmr            | 35          | ph         |          |
| dpr             | 29412       |            |          |

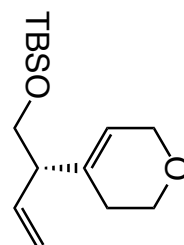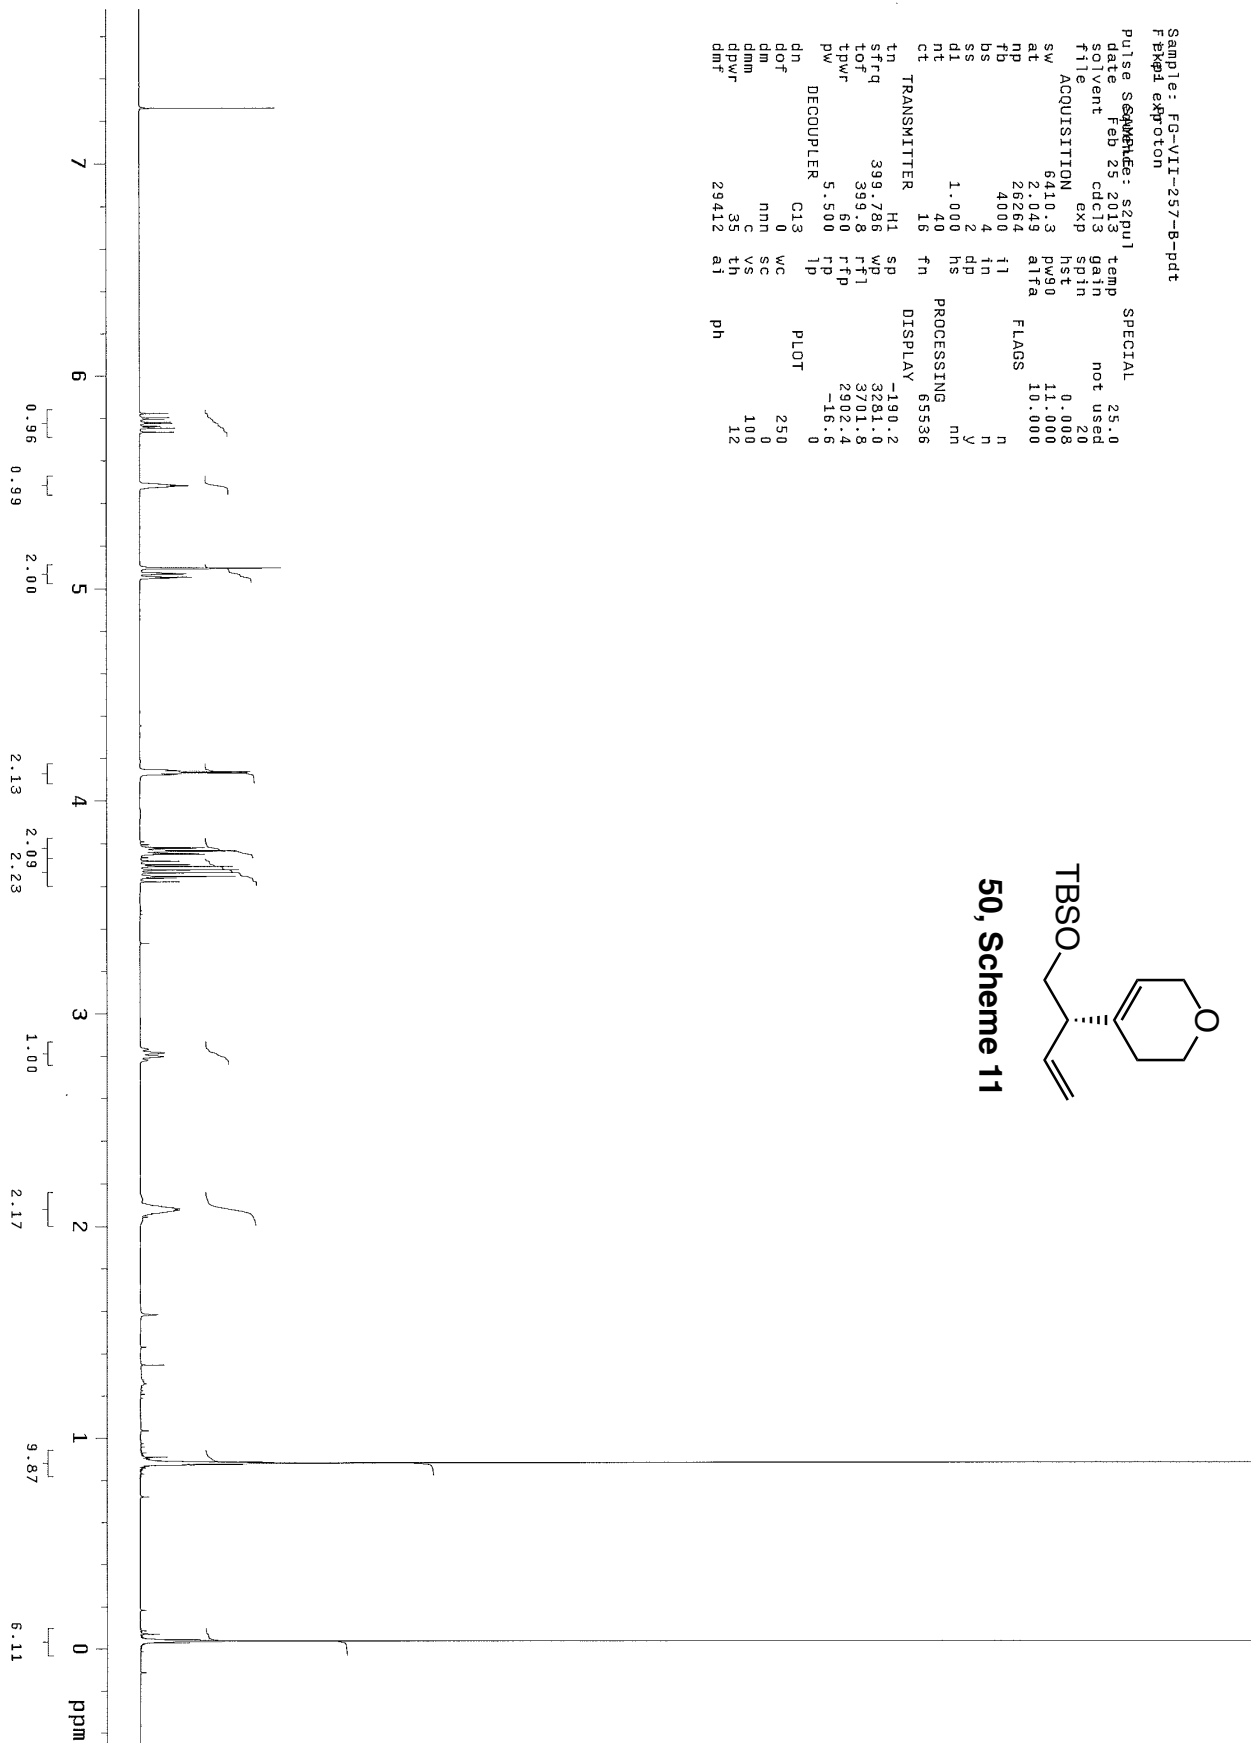

Sample: FG-VII-266-pdt  
 F1K001 exp1 otion

|         |             |            |          |
|---------|-------------|------------|----------|
| date    | Feb 28 2013 | temp       | 25.0     |
| solvent | cdcl3       | gain       | not used |
| file    | exp         | spin       | 20       |
| sw      | 6410.3      | nsf        | 0.008    |
| at      | 2.049       | pv90       | 11.000   |
| np      | 26264       | alfa       | 10.000   |
| fb      | 4000        | flags      | n        |
| bs      | 4           | in         | n        |
| ss      | 2           | dp         | y        |
| d1      | 1.000       | hs         | m        |
| nt      | 40          | processing | 65536    |
| ct      | 8           | fn         |          |

DECOUPLER C13  
 dn dof 0  
 dm dm 0  
 dmm dmm 300  
 dpwr dpwr 35  
 dmf dmf 29412

PH

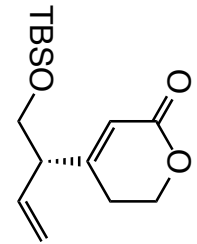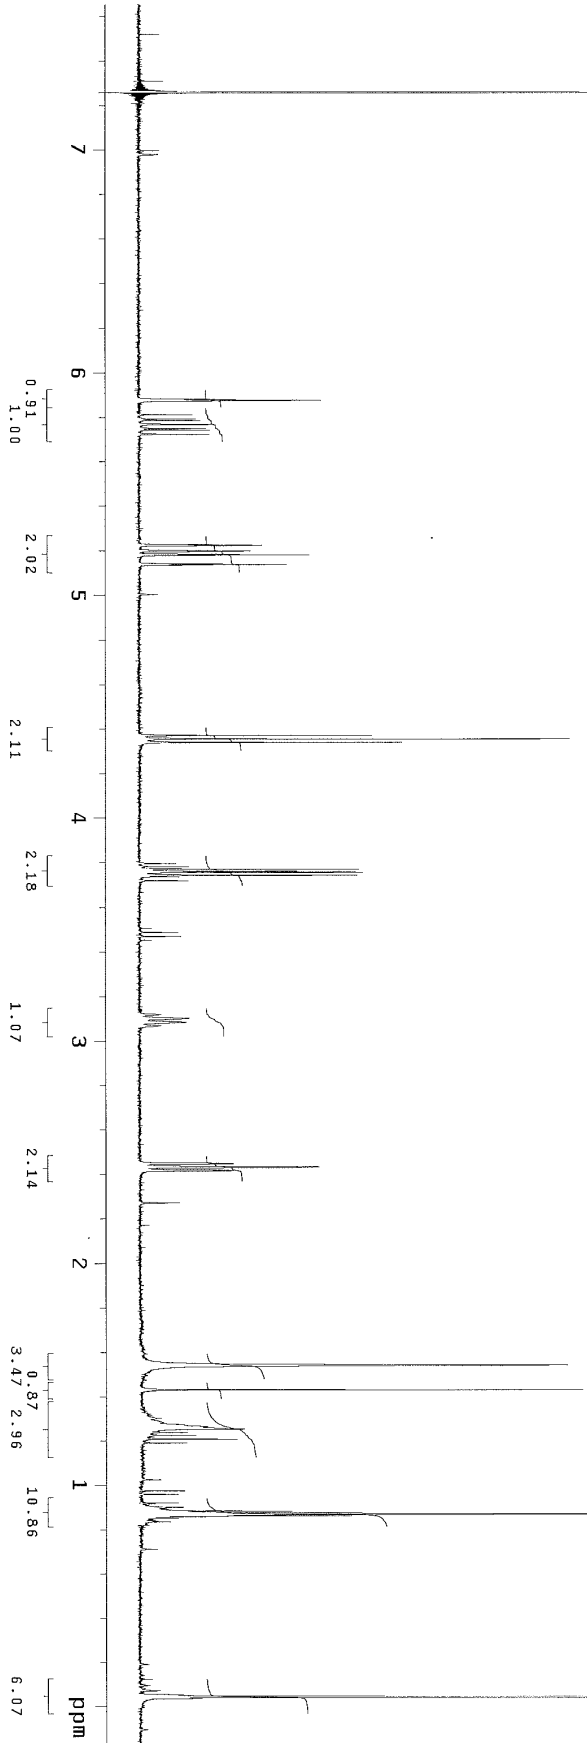



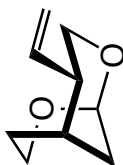

**semburin, Scheme 11**

```

Sample Name: FG-VII-103-pdt-1H
Date Collected on: 18-Nov-2013
nmr18-2013-11-18
Archive APP: 13-2013
Date Sep 13 2013
Sample Director: g46
Title: semburin
File: FG-VII-103-pdt-1H
Fid: 1
Pulse Sequence: zgpg30 (zgpg30)
Solvent: c6d6
NS: 4
DS: 4
AQ: 1.000
RG: 327.88
DE: 1.000
TE: 25.0
D1: 1.000
d11: 1.000
nt: 100
ct: 40
TR: TRANSMITTER H1
tn: 40
sfreq: 499.884
tot: 499.9
cpwr: 39
pw: 4.450
DECOUPLER: C13
dn: 0
dof: 0
dm: nm
decwv: W40_HCN5mm
dpcr: 35
dmf: 32258
temp: 25.0
gain: 30
SFO: 125.761
NUC1: 13C
P1: 0.008
P2: 8.900
P3: 10.000
P4: 10.000
P5: 10.000
P6: 10.000
P7: 10.000
P8: 10.000
P9: 10.000
P10: 10.000
P11: 10.000
P12: 10.000
P13: 10.000
P14: 10.000
P15: 10.000
P16: 10.000
P17: 10.000
P18: 10.000
P19: 10.000
P20: 10.000
P21: 10.000
P22: 10.000
P23: 10.000
P24: 10.000
P25: 10.000
P26: 10.000
P27: 10.000
P28: 10.000
P29: 10.000
P30: 10.000
P31: 10.000
P32: 10.000
P33: 10.000
P34: 10.000
P35: 10.000
P36: 10.000
P37: 10.000
P38: 10.000
P39: 10.000
P40: 10.000
P41: 10.000
P42: 10.000
P43: 10.000
P44: 10.000
P45: 10.000
P46: 10.000
P47: 10.000
P48: 10.000
P49: 10.000
P50: 10.000
P51: 10.000
P52: 10.000
P53: 10.000
P54: 10.000
P55: 10.000
P56: 10.000
P57: 10.000
P58: 10.000
P59: 10.000
P60: 10.000
P61: 10.000
P62: 10.000
P63: 10.000
P64: 10.000
P65: 10.000
P66: 10.000
P67: 10.000
P68: 10.000
P69: 10.000
P70: 10.000
P71: 10.000
P72: 10.000
P73: 10.000
P74: 10.000
P75: 10.000
P76: 10.000
P77: 10.000
P78: 10.000
P79: 10.000
P80: 10.000
P81: 10.000
P82: 10.000
P83: 10.000
P84: 10.000
P85: 10.000
P86: 10.000
P87: 10.000
P88: 10.000
P89: 10.000
P90: 10.000
P91: 10.000
P92: 10.000
P93: 10.000
P94: 10.000
P95: 10.000
P96: 10.000
P97: 10.000
P98: 10.000
P99: 10.000
P100: 10.000

```

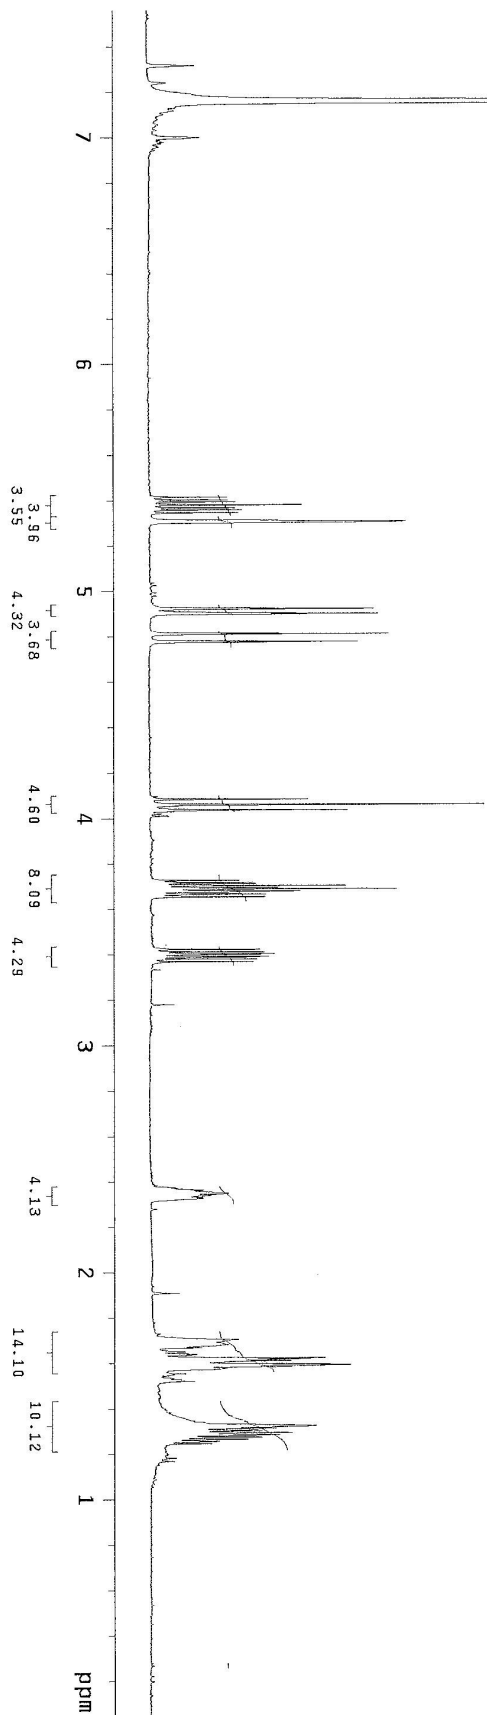



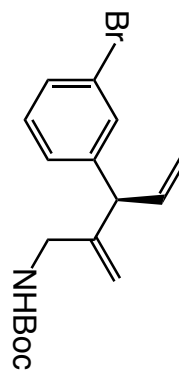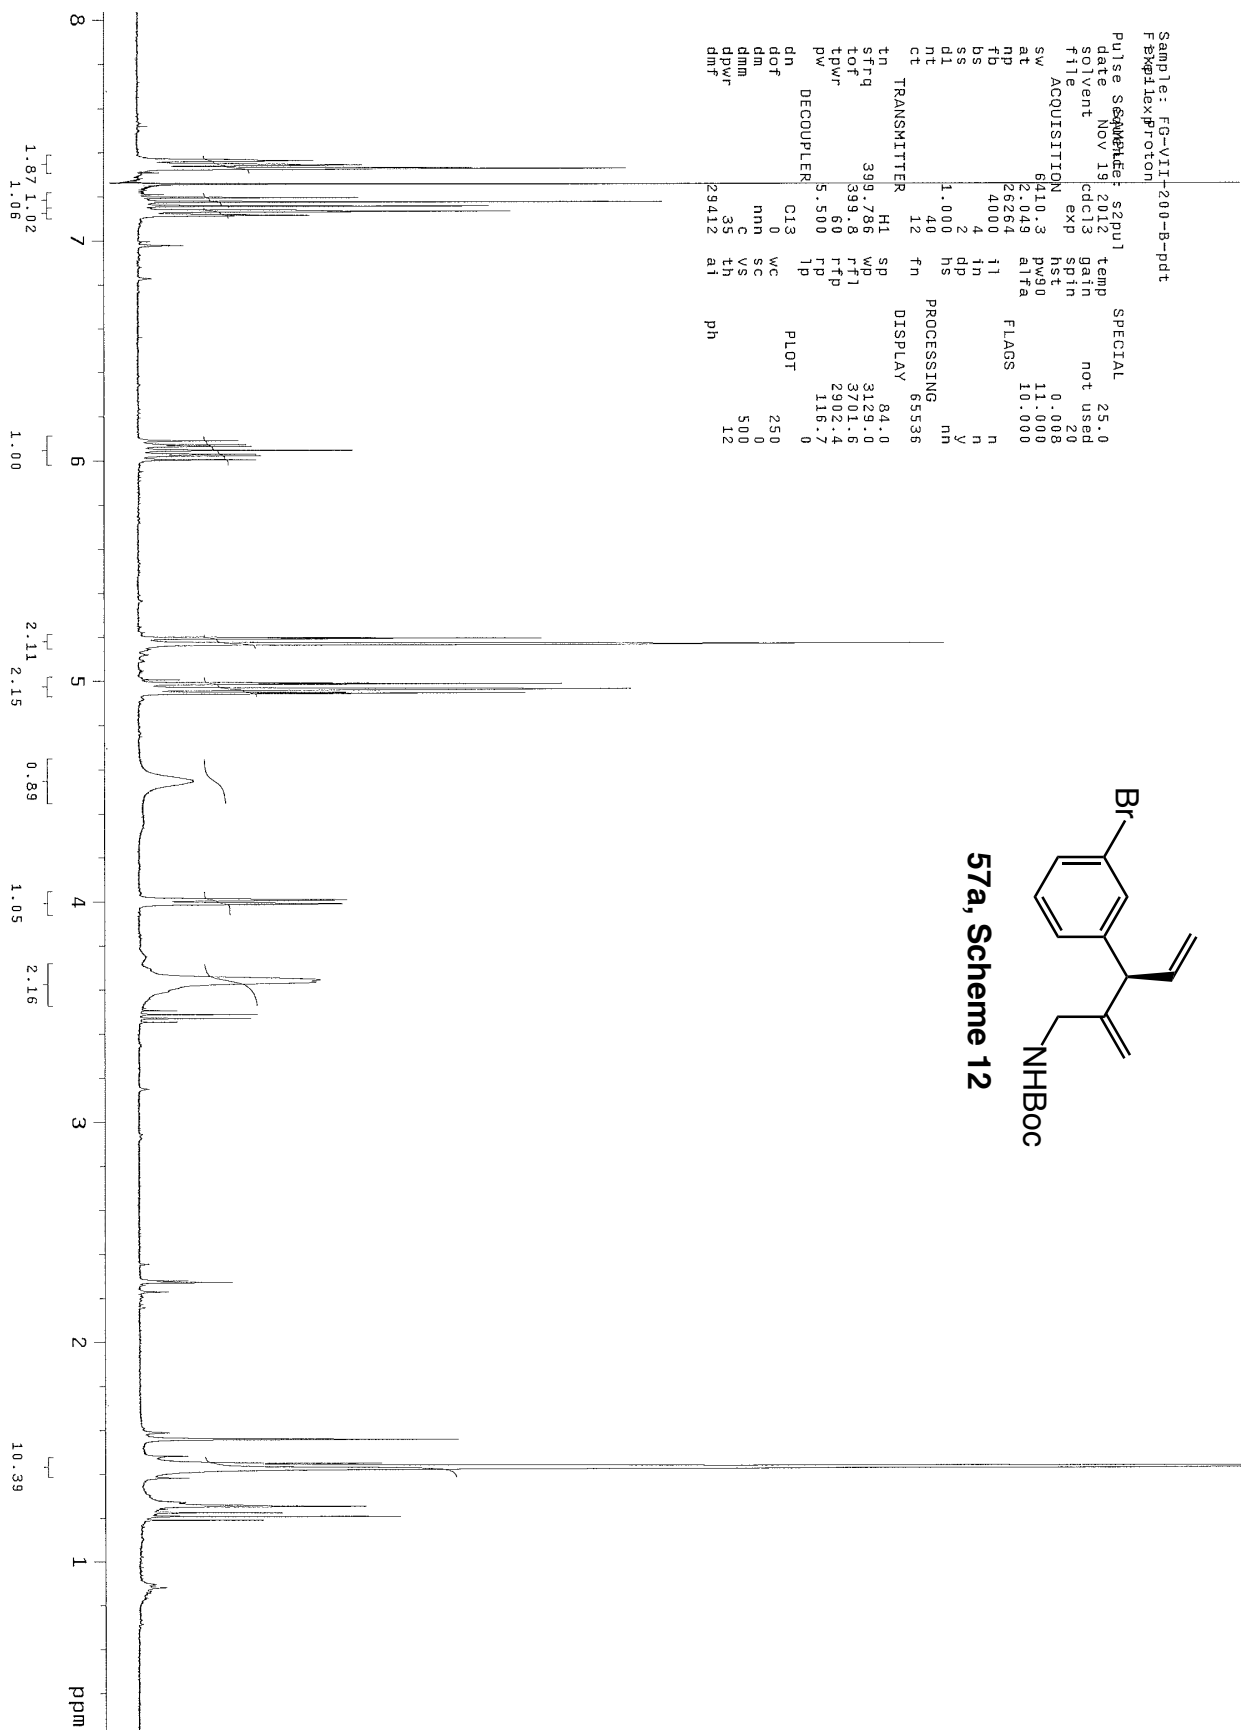

Sample: FG-VII-187-B-pdt  
 F1gpl exproton

|                        |         |          |
|------------------------|---------|----------|
| Pulse Sequence: s2pul1 | SPECIAL | 25.0     |
| date Oct 19 2012       | temp    | not used |
| solvent cdcl3          | gain    | 20       |
| file exp               | spin    | 0.008    |
| ACQUISITION            | hst     | 11.000   |
| sw 6410.3              | pw90    | 10.000   |
| at 2.049               | af1a    |          |
| np 26264               | FLAGS   | n        |
| fb 4000                | t1      | n        |
| bs 4                   | in      | y        |
| ss 2                   | dp      | nn       |
| di 1.000               | hs      |          |
| nt 40                  | fn      |          |
| ct 20                  | DISPLAY | 65536    |
| TRANSMITTER            | H1      | SP       |
| tn 399.786             | WP      | -2.6     |
| sfrq 399.8             | rfl     | 3204.9   |
| tof 60                 | rfd     | 3701.6   |
| tpwr 5.500             | fp      | 2902.4   |
| pw                     | lp      | 61.8     |
| DECOUPLER              | C13     | 1p       |
| dn                     | WC      | 0        |
| dof                    | mn      | 250      |
| dm                     | sc      | 0        |
| dmm                    | c       | 115      |
| dpwr                   | th      | 12       |
| dmf                    | at      | ph       |

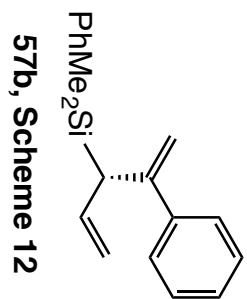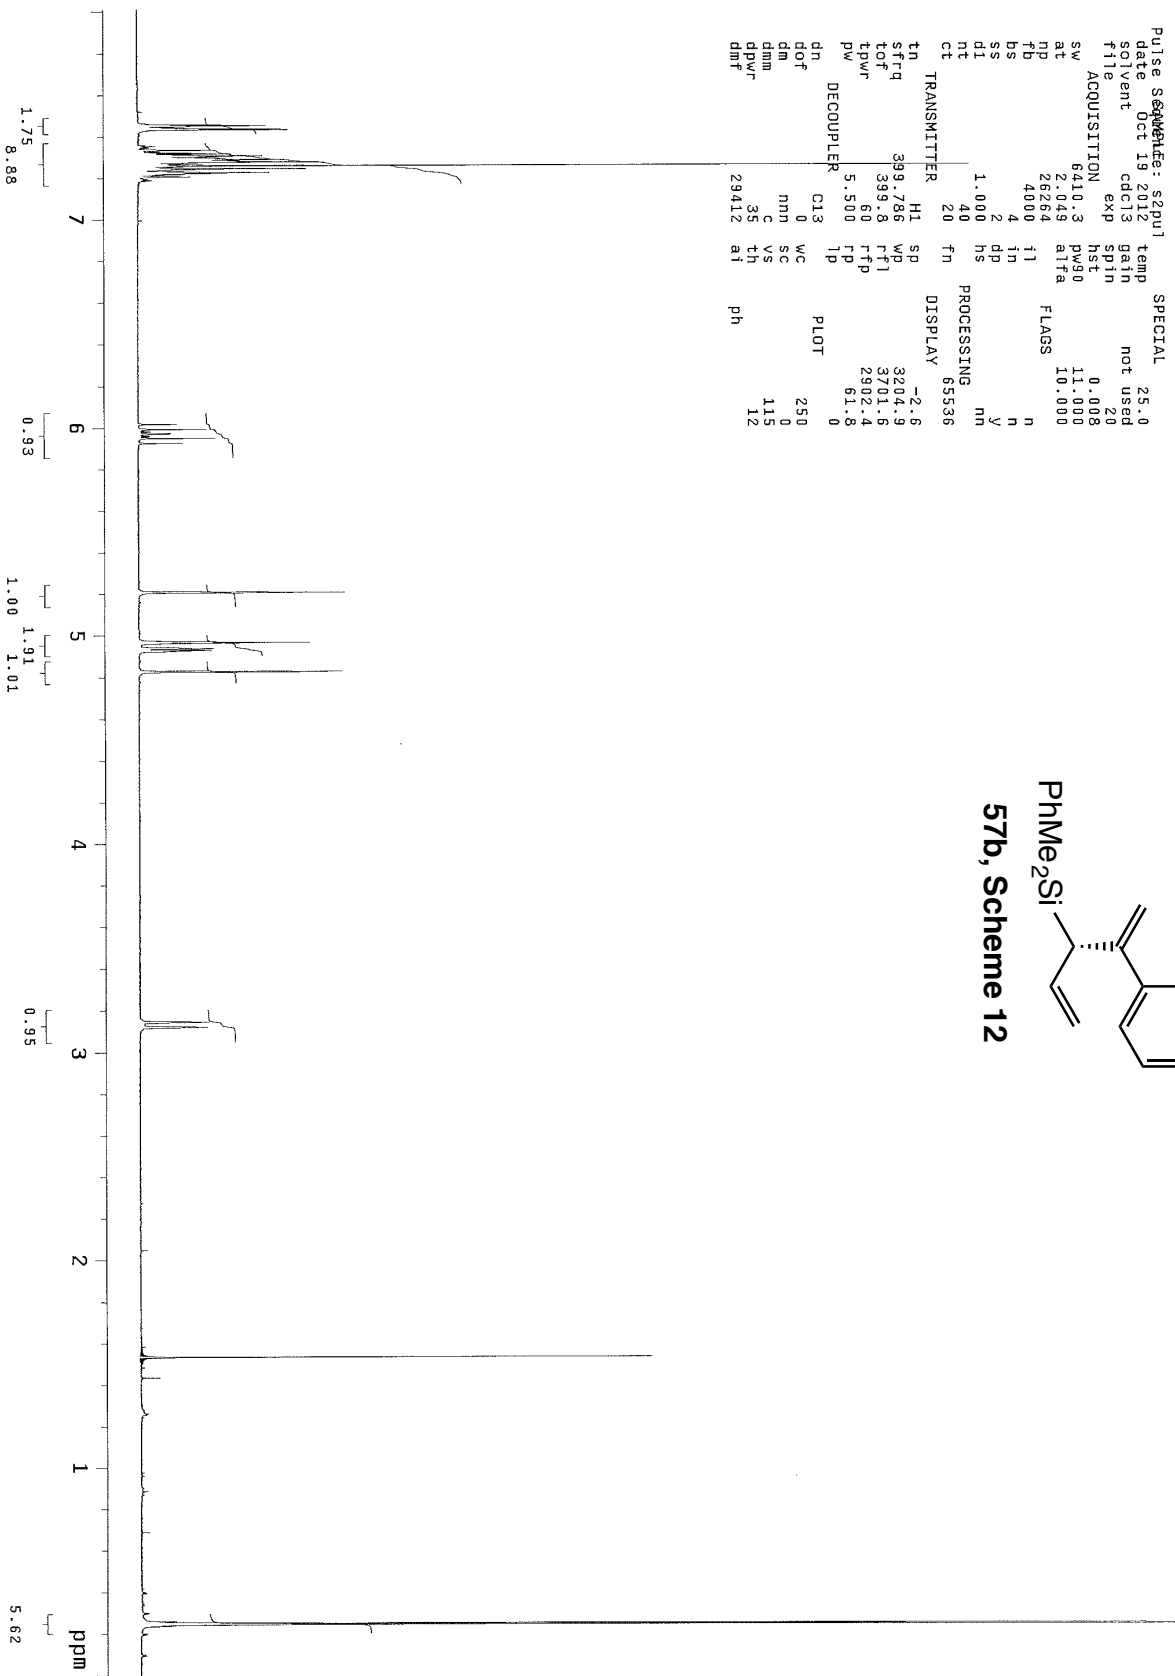

JLC-1275A\_F11-18

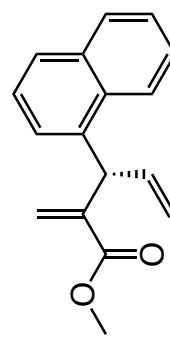

59a, Scheme 13

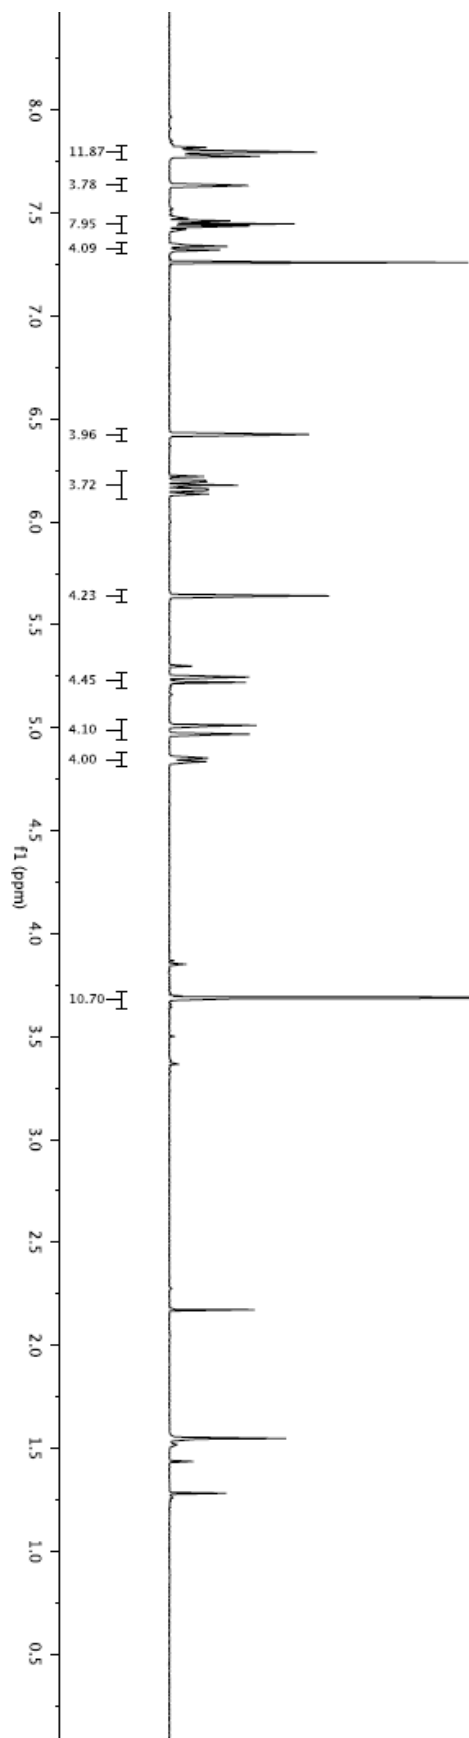

JLC-II-28\_F112-17

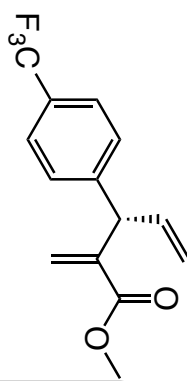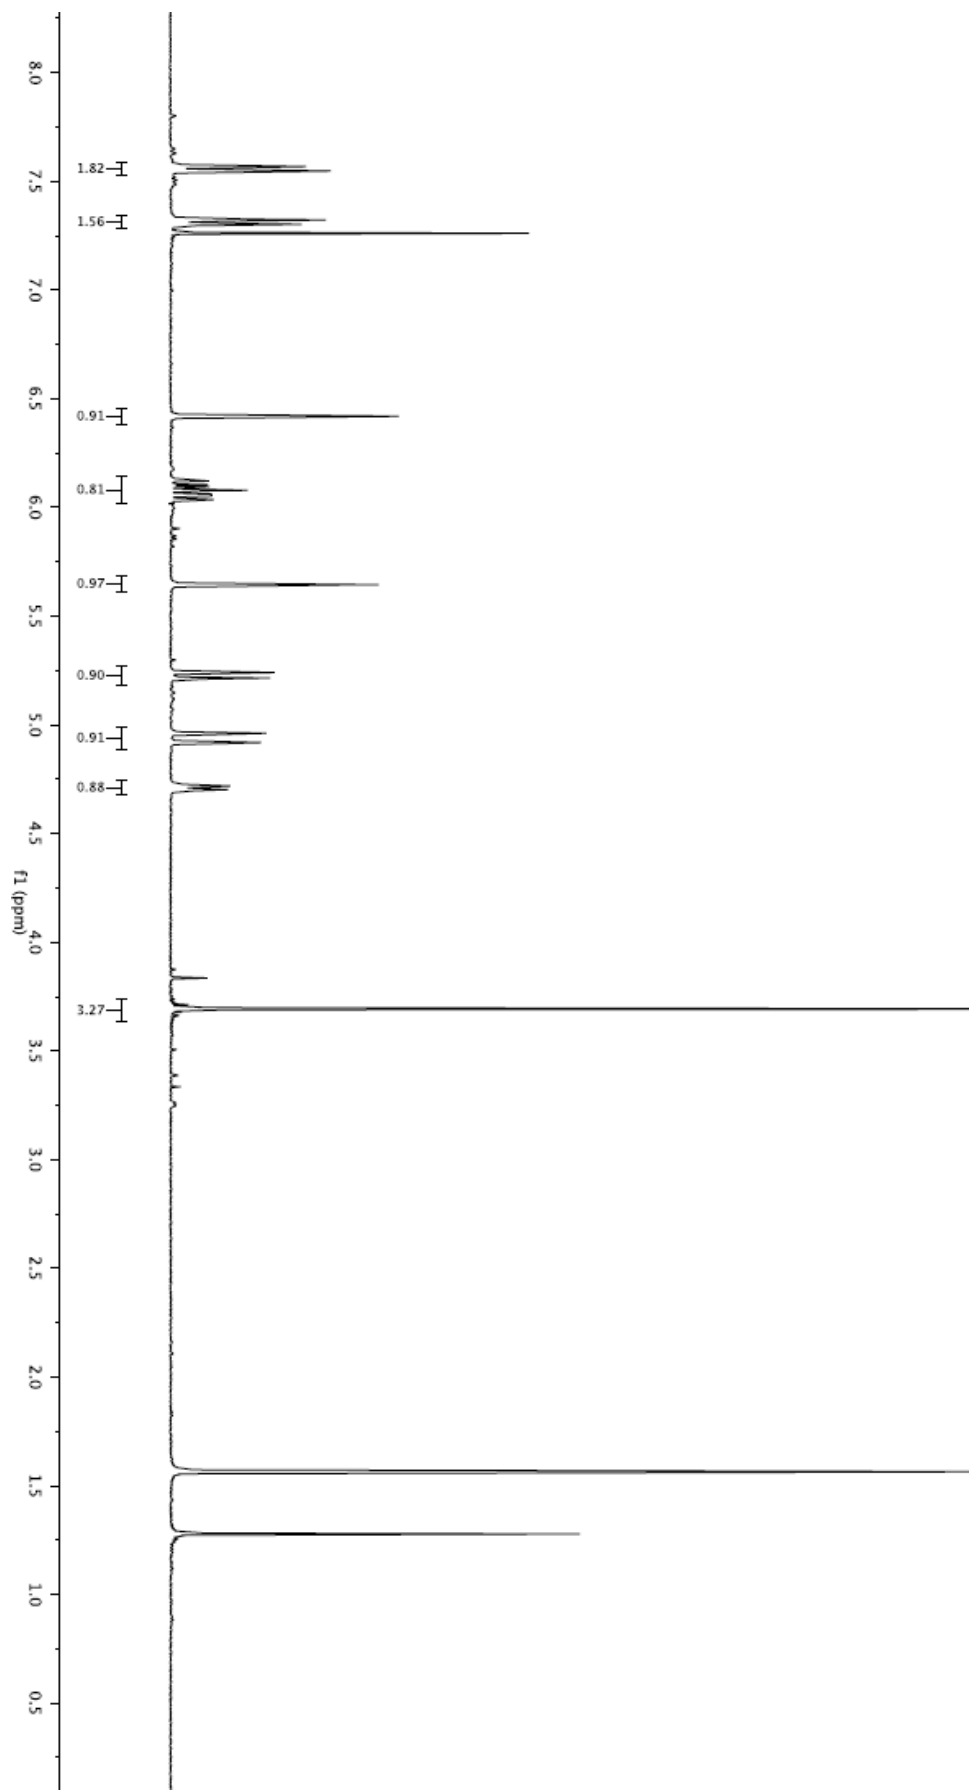

JLC-II-488\_F123-33

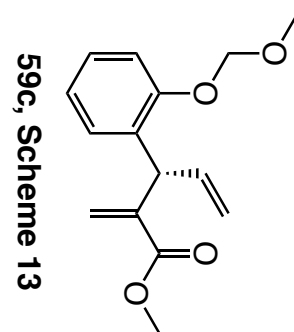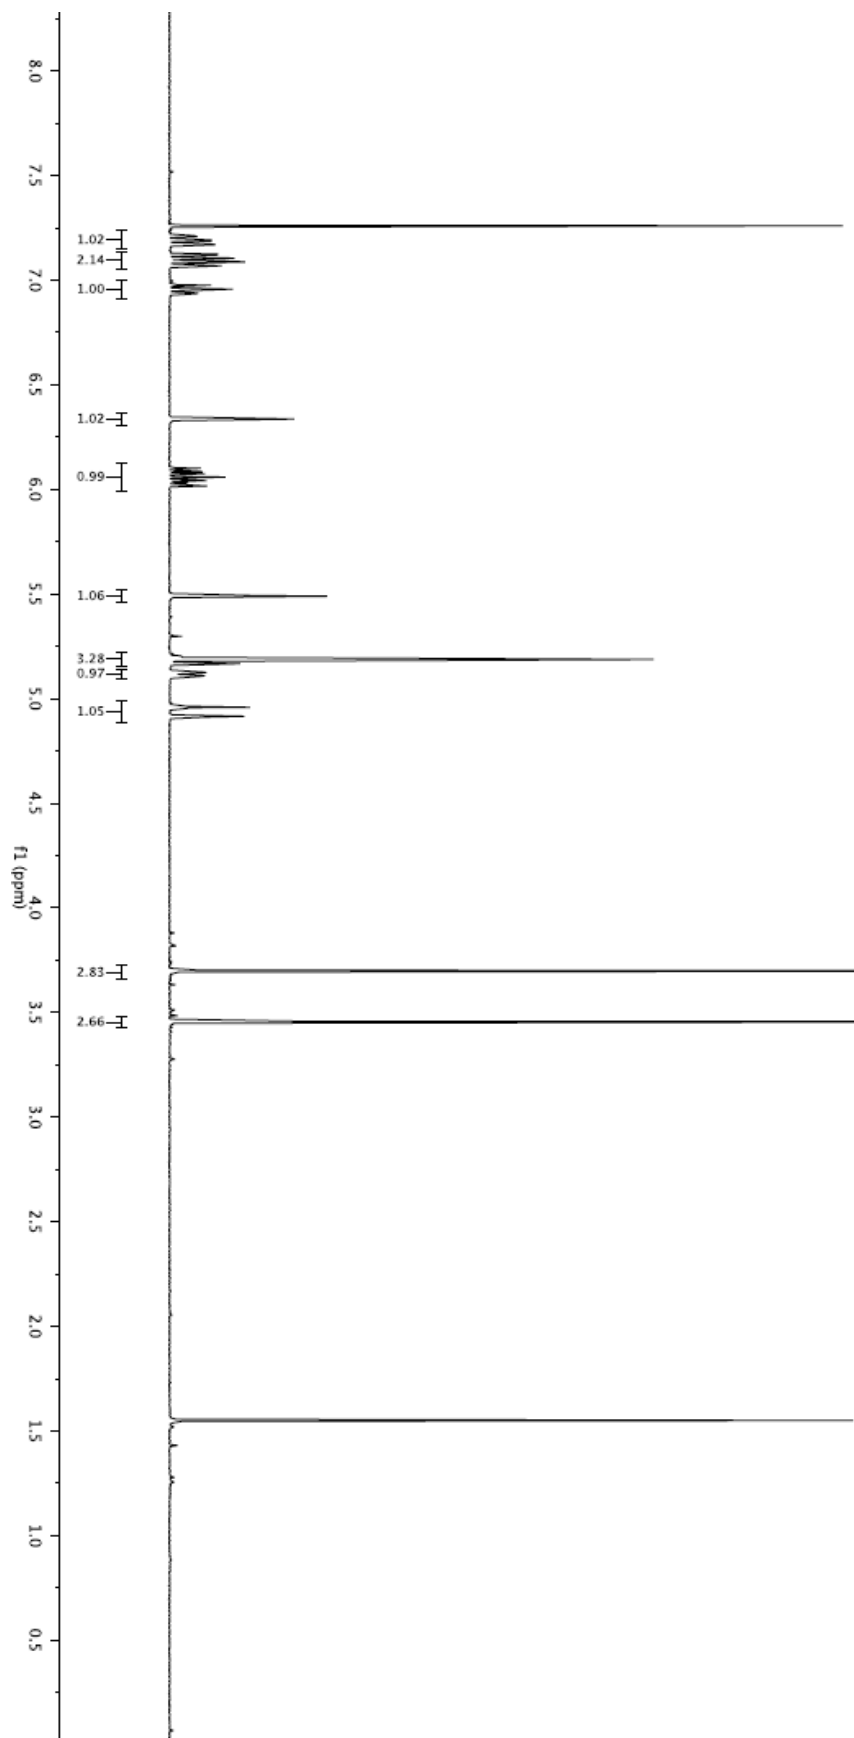

JLC-1-2708\_F13-15

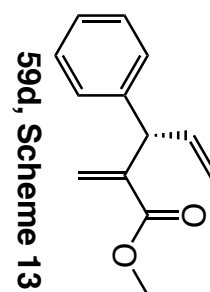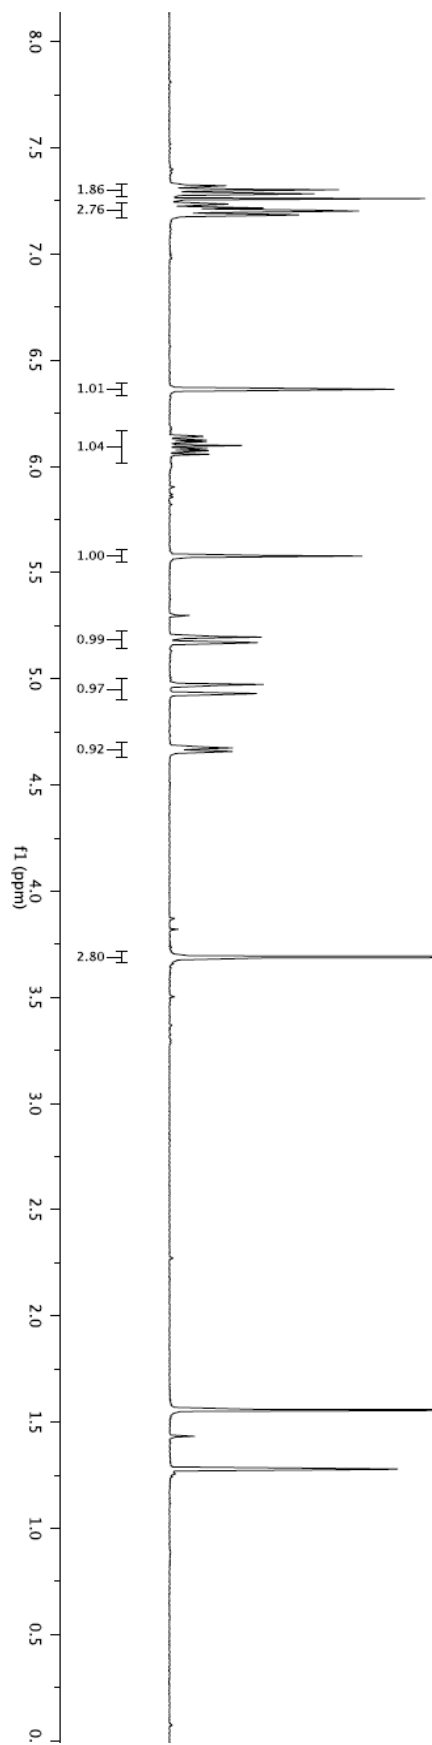

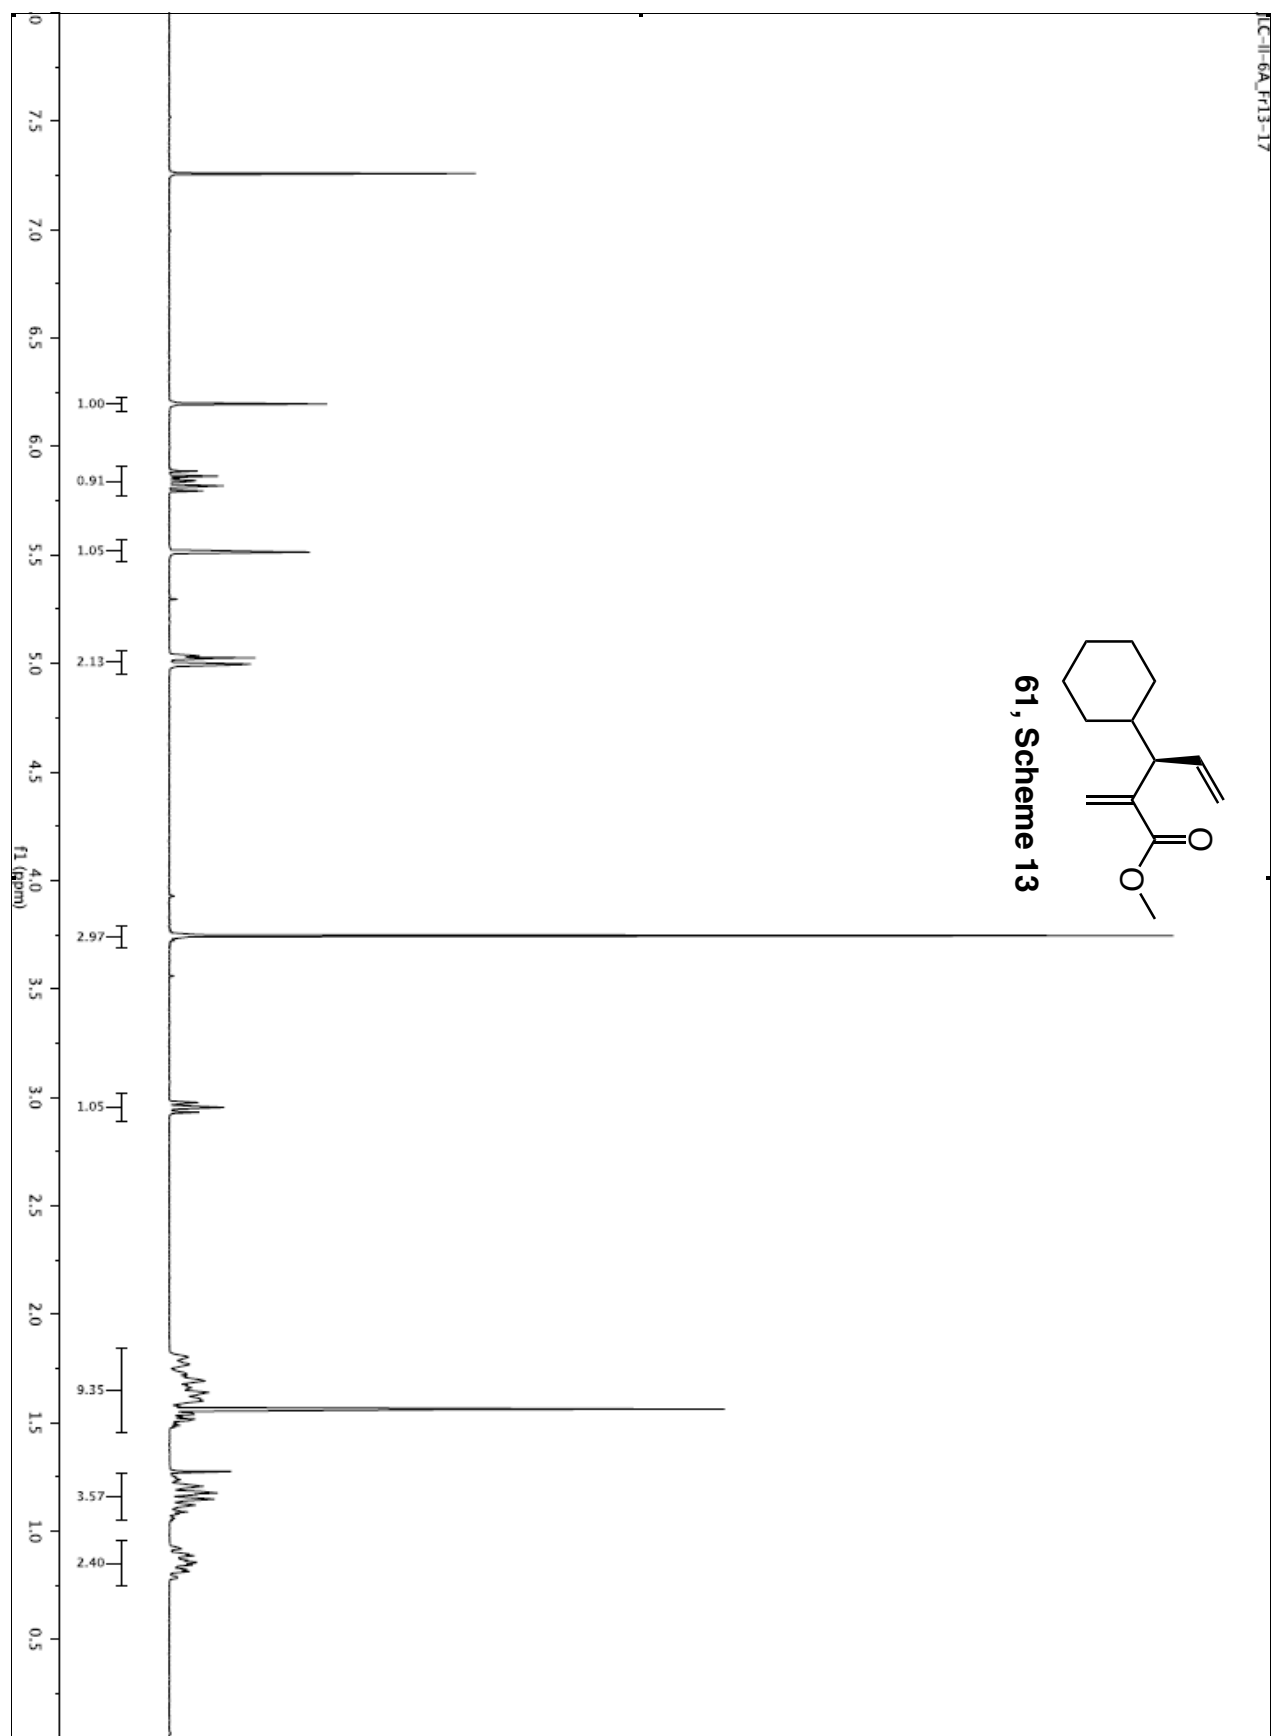

Supplement: ja4126565_si_002.pdf [file ja4126565_si_002.pdf]
